# Supplementary material for: A systematic review of pediatric clinical trials of high dose vitamin D
Source: PeerJ. 2016 Feb 25;4:e1701. doi: 10.7717/peerj.1701 (PMC4782742; doi:10.7717/peerj.1701)
Supplement: Dataset S1 [file peerj-04-1701-s014.xlsx]

## Sheet: PeerJ.csv
Title	Authors	Journal	Language	Year	PMID	Study design	Geographical location	Number of study sites	Patients enrolled in the study	Patients enrolled in the arm	Approved by REB/IRB	Consent obtained from participants	Study setting	Study setting - other	Number of arms in the study	Population details	Age groups	Eligibility age	Gender	Regimen type	Dose group	Frequency	Route	Form	Duration	Constant dose	Variable dose	Dose constant vs. variable	Calcium administered	Dose of calcium	Other medications	25OHD analyzed	Assay to measure 25OHD	Blood calcium analyzed	Urine calcium analyzed	Primary outcomes	Secondary outcomes	Overall risk of bias	Allocation sequence adequately generated	Allocation sequence adequately concealed	Blinding adequately performed	Incomplete outcome data adequately addressed	Free from selective outcome reporting	Free from financial conflicts of interest	Baseline 25(OH)D	Number of patients measured	25(OH)D Mean (nmol/L)	25(OH)D Median (nmol/L)	25(OH)D SD (nmol/L)
Effect of oral and intramuscular massive vitamin D doses on serum calcium in premature infants. [German].	E. Wagner, H. Czermak and W. Swoboda.	Wiener Medizinische Wochenschrift	German	1969	5801630	Controlled non-randomized	Europe	1	72	37	No comment on REB approval	No comment on consent process			2	Premature and/or low birth weight	Neonate	21-28 days	Both female/male	Intermittent	Above 40000	Single	PO	D3		100000		constant dose	No			No		Yes	No	Blood calcium		Medium/Unclear	Unclear	Unclear	Unclear	Yes	Yes	Yes	Not measured/reported
Effect of oral and intramuscular massive vitamin D doses on serum calcium in premature infants. [German].	E. Wagner, H. Czermak and W. Swoboda.	Wiener Medizinische Wochenschrift	German	1969	5801630	Controlled non-randomized	Europe	1	72	31	No comment on REB approval	No comment on consent process			2	Premature and/or low birth weight	Neonate	21-28 days	Both female/male	Intermittent	Above 40000	Single	IM	D3		100000		constant dose	No			No		Yes	No	Blood calcium		Medium/Unclear	Unclear	Unclear	Unclear	Yes	Yes	Yes	Not measured/reported
Effect of a single massive dose vitamin D therapy (oral or intramuscular) on rickets in Addis Ababa children.	M. Gebre-Medhin and B. Vahlquist.	Courrier	English	1972	N/A	RCT/qRCT	Africa	1	297	114	No comment on REB approval	No comment on consent process	Outpatient - hospital clinic		3	Rickets	Neonate, Infants, Toddlers	0-3 years	Both female/male	Intermittent	Above 40000	Single	IM	D2		250000		constant dose	No			No		No	No	Clinical Rickets	ALKP	Medium/Unclear	Unclear	Unclear	Unclear	Yes	Yes	Unclear	Not measured/reported
Effect of a single massive dose vitamin D therapy (oral or intramuscular) on rickets in Addis Ababa children.	M. Gebre-Medhin and B. Vahlquist.	Courrier	English	1972	N/A	RCT/qRCT	Africa	1	297	113	No comment on REB approval	No comment on consent process	Outpatient - hospital clinic		3	Rickets	Neonate, Infants, Toddlers	0-3 years	Both female/male	Intermittent	Above 40000	Single	PO	D2		250000		constant dose	No			No		No	No	Clinical Rickets	ALKP	Medium/Unclear	Unclear	Unclear	Unclear	Yes	Yes	Unclear	Not measured/reported
Effect of a single massive dose vitamin D therapy (oral or intramuscular) on rickets in Addis Ababa children.	M. Gebre-Medhin and B. Vahlquist.	Courrier	English	1972	N/A	RCT/qRCT	Africa	1	297	70	No comment on REB approval	No comment on consent process	Outpatient - hospital clinic		3	Rickets	Neonate, Infants, Toddlers	0-3 years	Both female/male	Daily	4000-39999	Daily	PO	D3	2	10000		constant dose	No			No		No	No	Clinical Rickets	ALKP	Medium/Unclear	Unclear	Unclear	Unclear	Yes	Yes	Unclear	Not measured/reported
Prevalence and treatment of vitamin D defeciency in children on anticonvulsant drugs	J. Silver, T. J. Davies, E. Kupersmitt, M. Orme, A. Petrie and F. Vajda	Archives of Disease in Childhood	English	1974	4151775	Single arm	Europe	1	33	33	No comment on REB approval	No comment on consent process	Inpatient - hospital		1	Epilepsy/Seizure	Primary school age, Adolescents	10-16 years	Both female/male	Weekly	1000-3999	Weekly	PO	D3	12	3000		constant dose	No			No		Yes	No	Clinical Rickets	Blood calcium, Phosphate, Bone mass marker	High	No	No	No	Yes	Yes	Yes	Not measured/reported
Biochemical status in epileptic patients during treatment with vitamin D. A controlled therapeutic trial	C. Christiansen, P. Roodbro and Sjo	Acta Neurologica Scandinavica	English	1975	1155033	RCT/qRCT	Europe	1	21	13	No comment on REB approval	No comment on consent process			2	Epilepsy/Seizure	Primary school age, Adolescents	7-20 years	Both female/male	placebo	none/placebo	Daily	PO		4			Placebo	Yes	500 mg/day		No		Yes	No	Blood calcium, ALKP	ALKP	Medium/Unclear	Unclear	Unclear	Unclear	Unclear	No	Unclear	Not measured/reported
Biochemical status in epileptic patients during treatment with vitamin D. A controlled therapeutic trial	C. Christiansen, P. Roodbro and Sjo	Acta Neurologica Scandinavica	English	1975	1155033	RCT/qRCT	Europe	1	21	8	No comment on REB approval	No comment on consent process			2	Epilepsy/Seizure	Primary school age, Adolescents	7-20 years	Both female/male	Daily	4000-39999	Daily	PO	D2	4	4000		constant dose	Yes	500 mg/day		No		Yes	No	Blood calcium, ALKP	ALKP	Medium/Unclear	Unclear	Unclear	Unclear	Unclear	No	Unclear	Not measured/reported
Growth and mineral metabolism in very low birth weight infants. I. Comparison of the effects of two modes of NaHCO3 treatment of late metabolic acidosis	I. C. Radde, G. W. Chance, K. Bailey, J. O'Brien, G. M. Day and J. Sheepers.	Pediatric Research	English	1975	1161344	RCT/qRCT	North America	1	26	14	No comment on REB approval	No comment on consent process	Inpatient - hospital		2	Premature and/or low birth weight	Neonate	14-14 days	Not specified	Daily	RDA/AI to999	Daily	PO	D2	6	400		constant dose	No		NaHCO3	No		Yes	No	Blood pH	Blood calcium, Bone mass marker	Medium/Unclear	Unclear	Unclear	No	Yes	Yes	Unclear	Not measured/reported
Growth and mineral metabolism in very low birth weight infants. I. Comparison of the effects of two modes of NaHCO3 treatment of late metabolic acidosis	I. C. Radde, G. W. Chance, K. Bailey, J. O'Brien, G. M. Day and J. Sheepers.	Pediatric Research	English	1975	1161344	RCT/qRCT	North America	1	26	12	No comment on REB approval	No comment on consent process	Inpatient - hospital		2	Premature and/or low birth weight	Neonate	14-14 days	Not specified	Daily	RDA/AI to999	Daily	PO	D2	6	400		constant dose	No		NaHCO3	No		Yes	No	Blood pH	Blood calcium, Bone mass marker	Medium/Unclear	Unclear	Unclear	No	Yes	Yes	Unclear	Not measured/reported
Growth and mineral metabolism in very low birth weight infants. II. Effects of calcium supplementation on growth and divalent cations.	G. M. Day, G. W. Chance, I. C. Radde, B. J. Reilly, E. Park and J. Sheepers.	Pediatric Research	English	1975	1161345	RCT/qRCT	North America	1	30	16	No comment on REB approval	No comment on consent process	Inpatient - hospital		2	Premature and/or low birth weight	Neonate	14-21 days	Not specified	Daily	RDA/AI to999	Daily	PO	D2	5.2	500		constant dose	No		Multivitamin preparation, Improved SMA-S26 formula	No		Yes	Yes	Blood calcium	Urine calcium, Phosphate, Clinical Rickets, Blood pH, Magnesium, Plasma protein, Lipids	High	Unclear	Unclear	No	Yes	No	Unclear	Not measured/reported
Growth and mineral metabolism in very low birth weight infants. II. Effects of calcium supplementation on growth and divalent cations.	G. M. Day, G. W. Chance, I. C. Radde, B. J. Reilly, E. Park and J. Sheepers.	Pediatric Research	English	1975	1161345	RCT/qRCT	North America	1	30	14	No comment on REB approval	No comment on consent process	Inpatient - hospital		2	Premature and/or low birth weight	Neonate	14-21 days	Not specified	Daily	RDA/AI to999	Daily	PO	D2	5	500		constant dose	Yes	Calcium lactate 800 mg/Kg/24hr	Multivitamin preparation, Improved SMA-S26 formula	No		Yes	Yes	Blood calcium	Urine calcium, Phosphate, Clinical Rickets, Blood pH, Magnesium, Plasma protein, Lipids	High	Unclear	Unclear	No	Yes	No	Unclear	Not measured/reported
Iatrogenic osteomalacia in epileptic children. A controlled therapeutic trial	C. Christiansen, P. Rodbro and C. T. Nielsen	Acta Paediatrica Scandinavica	English	1975	1130178	RCT/qRCT	Europe	1	25	14	No comment on REB approval	No comment on consent process	Outpatient - hospital clinic		2	Epilepsy/Seizure	Primary school age, Adolescents	7-14 years	Not specified	Daily	1000-3999	Daily	PO	D2	12	2000		constant dose	Yes	500 mg/day		No		Yes	No	Bone mass marker	Blood calcium, ALKP	Medium/Unclear	Yes	Unclear	Unclear	Yes	No	Yes	Not measured/reported
Iatrogenic osteomalacia in epileptic children. A controlled therapeutic trial	C. Christiansen, P. Rodbro and C. T. Nielsen	Acta Paediatrica Scandinavica	English	1975	1130178	RCT/qRCT	Europe	1	25	11	No comment on REB approval	No comment on consent process	Outpatient - hospital clinic		2	Epilepsy/Seizure	Primary school age, Adolescents	7-14 years	Not specified	placebo	none/placebo	Daily	PO		12	0		Placebo	Yes	500 mg/day		No		Yes	No	Bone mass marker	Blood calcium, ALKP	Medium/Unclear	Yes	Unclear	Unclear	Yes	No	Yes	Not measured/reported
Serum alkaline phosphatase and urinary hydroxyproline values in children receiving phenobarbital with and without vitamin D.	D. Liakakos, Z. Papadopoulos, P. Vlachos, E. Boviatsi and D. D. Varonos.	Journal of Pediatrics	English	1975	807698	RCT/qRCT	Europe	1	36	12	No comment on REB approval	No comment on consent process			2	Epilepsy/Seizure	Primary school age, Adolescents	5-14 years	Both female/male	placebo	none/placebo							Placebo	No		Anticonvulsant drugs (Phenobarbitone)	No		No	No	Bone mass marker, ALKP, Urinary hydroxyproline	Clinical Rickets	High	Unclear	Unclear	No	Yes	No	No	Not measured/reported
Serum alkaline phosphatase and urinary hydroxyproline values in children receiving phenobarbital with and without vitamin D.	D. Liakakos, Z. Papadopoulos, P. Vlachos, E. Boviatsi and D. D. Varonos.	Journal of Pediatrics	English	1975	807698	RCT/qRCT	Europe	1	36	8	No comment on REB approval	No comment on consent process			2	Epilepsy/Seizure	Primary school age, Adolescents	5-14 years	Both female/male	Intermittent	Above 40000	Single	PO	D2		200000		constant dose	No		Anticonvulsant drugs (Phenobarbitone)	No		No	No	Bone mass marker, ALKP, Urinary hydroxyproline	Clinical Rickets	High	Unclear	Unclear	No	Yes	No	No	Not measured/reported
Serum alkaline phosphatase and urinary hydroxyproline values in children receiving phenobarbital with and without vitamin D.	D. Liakakos, Z. Papadopoulos, P. Vlachos, E. Boviatsi and D. D. Varonos.	Journal of Pediatrics	English	1975	807698	RCT/qRCT	Europe	1	36	8	No comment on REB approval	No comment on consent process			2	Epilepsy/Seizure	Primary school age, Adolescents	5-14 years	Both female/male	Daily	4000-39999	Daily	PO	D2	8.6	4000		constant dose	No		Anticonvulsant drugs (Phenobarbitone)	No		No	No	Bone mass marker, ALKP, Urinary hydroxyproline	Clinical Rickets	High	Unclear	Unclear	No	Yes	No	No	Not measured/reported
Serum alkaline phosphatase and urinary hydroxyproline values in children receiving phenobarbital with and without vitamin D.	D. Liakakos, Z. Papadopoulos, P. Vlachos, E. Boviatsi and D. D. Varonos.	Journal of Pediatrics	English	1975	807698	RCT/qRCT	Europe	1	36	8	No comment on REB approval	No comment on consent process			2	Epilepsy/Seizure	Primary school age, Adolescents	5-14 years	Both female/male	Daily	4000-39999	Daily	PO	D2	8.6	4000		constant dose	No		Anticonvulsant drugs (Phenobarbitone)	No		No	No	Bone mass marker, ALKP, Urinary hydroxyproline	Clinical Rickets	High	Unclear	Unclear	No	Yes	No	No	Not measured/reported
Therapeutic and collateral effects of 25-hydroxycholecalciferol in vitamin D deficiency	M. Moya, J. Beltran and J. Colomer	European Journal Pediatrics	English	1977	23950	RCT/qRCT	Europe	1	20	11	No comment on REB approval	No comment on consent process	Inpatient - hospital		2	Rickets	Infants, Toddlers	3-18 months	Not specified	Other/non-vitamin	none/placebo	Daily	PO		3			Other/non-vitamin	No		25-Hydroxycholecalciferol	No		Yes	Yes	Clinical Rickets	Blood calcium, Urine calcium, Phosphate, ALKP, Urine pH	Medium/Unclear	Unclear	Unclear	Unclear	Yes	Yes	Unclear	Not measured/reported
Therapeutic and collateral effects of 25-hydroxycholecalciferol in vitamin D deficiency	M. Moya, J. Beltran and J. Colomer	European Journal Pediatrics	English	1977	23950	RCT/qRCT	Europe	1	20	9	No comment on REB approval	No comment on consent process	Inpatient - hospital		2	Rickets	Infants, Toddlers	3-18 months	Not specified	Daily	4000-39999	Daily	Unclear	D3	3	6000		constant dose	No			No		Yes	Yes	Clinical Rickets	Blood calcium, Urine calcium, Phosphate, ALKP, Urine pH	Medium/Unclear	Unclear	Unclear	Unclear	Yes	Yes	Unclear	Not measured/reported
Plasma 25-hydroxycholecalciferol after daily vitamin D administration in comparison with massive single-dose prophylaxis	D. Holst-Gemeiner, M. Gemeiner, I. Pilz and W. Swoboda	Wiener Klinische Wochenschrift	German	1978	676309	Controlled non-randomized	Europe	1	21	10	No comment on REB approval	No comment on consent process	Outpatient - hospital clinic		2	Healthy/Subclinical VDD	Neonate	0-8 days	Both female/male	Daily	1000-3999	Daily	PO	D3	6	1200		constant dose	No			Yes	Immunoassay	No	No	25OHD		Medium/Unclear	Unclear	Unclear	No	Unclear	No	Unclear	< 50 nmol/l	10	30		6.5
Plasma 25-hydroxycholecalciferol after daily vitamin D administration in comparison with massive single-dose prophylaxis	D. Holst-Gemeiner, M. Gemeiner, I. Pilz and W. Swoboda	Wiener Klinische Wochenschrift	German	1978	676309	Controlled non-randomized	Europe	1	21	11	No comment on REB approval	No comment on consent process	Outpatient - hospital clinic		2	Healthy/Subclinical VDD	Neonate	0-8 days	Both female/male	Intermittent	Above 40000	Single	PO	D3		200000		constant dose	No			Yes	Immunoassay	No	No	25OHD		Medium/Unclear	Unclear	Unclear	No	Unclear	No	Unclear	< 50 nmol/l	11	32		28
Plasma 25 hydroxyvitamin D concentrations in preterm infants receiving oral vitamin D supplements.	M. J. Robinson, A. L. Merrett, V. A. Tetlow and J. E. Compston.	Archives of Disease in Childhood	English	1981	6258489	RCT/qRCT	Europe	1	18	9	No comment on REB approval	Yes			2	Premature and/or low birth weight	Neonate	15-15 days	Not specified	Daily	RDA/AI to999	Daily	PO	D3	6	400		constant dose	No			Yes	Other	Yes	No	25OHD	Blood calcium, Clinical Rickets, ALKP	Medium/Unclear	Unclear	Unclear	Unclear	Yes	No	Unclear	< 50 nmol/l	9	22.7
Plasma 25 hydroxyvitamin D concentrations in preterm infants receiving oral vitamin D supplements.	M. J. Robinson, A. L. Merrett, V. A. Tetlow and J. E. Compston.	Archives of Disease in Childhood	English	1981	6258489	RCT/qRCT	Europe	1	18	9	No comment on REB approval	Yes			2	Premature and/or low birth weight	Neonate	15-15 days	Not specified	Daily	1000-3999	Daily	PO	D3	7	1000		constant dose	No			Yes	Other	Yes	No	25OHD	Blood calcium, Clinical Rickets, ALKP	Medium/Unclear	Unclear	Unclear	Unclear	Yes	No	Unclear	< 50 nmol/l	9	22
Vitamin D metabolism in preterm infants: serum calcitriol values during the first five days of life.	F. H. Glorieux, B. L. Salle, E. E. Delvin and L. David.	Journal of Pediatrics	English	1981	6895088	RCT/qRCT	Europe	1	16	8	Yes	Yes	Inpatient - hospital		2	Premature and/or low birth weight	Neonate	0-0 days	Not specified	placebo	none/placebo							Placebo	Yes	50 mg	Phosphorus	Yes	Other	Yes	No	125(OH)2D	25OHD, Blood calcium, Phosphate, PTH	Medium/Unclear	Unclear	Unclear	No	Yes	Yes	Yes	< 50 nmol/l	7	20
Vitamin D metabolism in preterm infants: serum calcitriol values during the first five days of life.	F. H. Glorieux, B. L. Salle, E. E. Delvin and L. David.	Journal of Pediatrics	English	1981	6895088	RCT/qRCT	Europe	1	16	8	Yes	Yes	Inpatient - hospital		2	Premature and/or low birth weight	Neonate	0-0 days	Not specified	Daily	1000-3999	Daily	PO	D3	0.7	2100		constant dose	Yes	50 mg	Phosphorus	Yes	Other	Yes	No	125(OH)2D	25OHD, Blood calcium, Phosphate, PTH	Medium/Unclear	Unclear	Unclear	No	Yes	Yes	Yes	< 50 nmol/l	7	20
25-hydroxy-vitamin-D in serum of newborns and infants during continuous oral vitamin D treatment	C. Kunz, H. von Lilienfeld-Toal, M. Niesen and W. Burmeister	Padiatrie und Padologie	German	1982	6285250	Controlled non-randomized	Europe	1	29	13	No comment on REB approval	Yes	Outpatient - hospital clinic		2	Healthy/Subclinical VDD	Neonate	0-1 months	Both female/male	Daily	RDA/AI to999	Daily	PO	Unclear	6	500		constant dose	No			Yes	Other	No	No	25OHD	Blood calcium, PTH	Medium/Unclear	Unclear	Unclear	Unclear	Yes	No	Unclear	< 50 nmol/l	13	32.5		12.5
25-hydroxy-vitamin-D in serum of newborns and infants during continuous oral vitamin D treatment	C. Kunz, H. von Lilienfeld-Toal, M. Niesen and W. Burmeister	Padiatrie und Padologie	German	1982	6285250	Controlled non-randomized	Europe	1	29	16	No comment on REB approval	Yes	Outpatient - hospital clinic		2	Healthy/Subclinical VDD	Neonate	0-1 months	Both female/male	Daily	1000-3999	Daily	PO	Unclear	6	1000		constant dose	No			Yes	Other	No	No	25OHD	Blood calcium, PTH	Medium/Unclear	Unclear	Unclear	Unclear	Yes	No	Unclear	< 50 nmol/l	16	37.5		17.5
Studies on vitamin D metabolism in malnourished children	N. Raghuramulu and V. Reddy	British Journal of Nutrition	English	1982	6279142	Controlled non-randomized	East Asia	1	10	5	Yes	Yes			2	Healthy/Subclinical VDD	Toddlers, Primary school age	1-5 years	Not specified	Intermittent	Above 40000	Single	PO	D3		600000		constant dose	No			Yes	Immunoassay	Yes	No	25OHD		Medium/Unclear	Unclear	Unclear	No	Yes	Yes	Unclear	> 80 nmol/l	5	95.75
Studies on vitamin D metabolism in malnourished children	N. Raghuramulu and V. Reddy	British Journal of Nutrition	English	1982	6279142	Controlled non-randomized	East Asia	1	27	14	Yes	Yes			2	Malnutrition	Toddlers, Primary school age	1-5 years	Not specified	Intermittent	Above 40000	Single	PO	D3		600000		constant dose	No			Yes	Immunoassay	Yes	No	25OHD		Medium/Unclear	Unclear	Unclear	No	Yes	Yes	Unclear	< 50 nmol/l	14	41
Studies on vitamin D metabolism in malnourished children	N. Raghuramulu and V. Reddy	British Journal of Nutrition	English	1982	6279142	Controlled non-randomized	East Asia	1	10	5	Yes	Yes			2	Healthy/Subclinical VDD	Toddlers, Primary school age	1-5 years	Not specified	Daily	1000-3999	Daily	PO	D3	3	2000		constant dose	No			Yes	Immunoassay	Yes	No	25OHD		Medium/Unclear	Unclear	Unclear	No	Yes	Yes	Unclear	50 - 80 nmol/l	5	65.25
Studies on vitamin D metabolism in malnourished children	N. Raghuramulu and V. Reddy	British Journal of Nutrition	English	1982	6279142	Controlled non-randomized	East Asia	1	27	13	Yes	Yes			2	Malnutrition	Toddlers, Primary school age	1-5 years	Not specified	Daily	1000-3999	Daily	PO	D3	3	2000		constant dose	No			Yes	Immunoassay	Yes	No	25OHD		Medium/Unclear	Unclear	Unclear	No	Yes	Yes	Unclear	50 - 80 nmol/l	13	59.5
Effect of low dose 1 alpha-hydroxycholecalciferol on glomerular filtration rate in moderate renal failure	F. U. Eke and M. H. Winterborn	Archives of Disease in Childhood	English	1983	6357106	RCT/qRCT	Europe	1	16	8	No comment on REB approval	Yes			2	Renal disease	Primary school age, Adolescents	6.5-18 year	Not specified	placebo	none/placebo	Daily	PO		52	0		Placebo	No		1-a-hydroxycholecaliferol	No		Yes	Yes	Renal marker, GFR	Blood calcium, Phosphate, Bone mass marker, PTH, Bone biposy	Medium/Unclear	Unclear	Unclear	Yes	Yes	No	Unclear	Not measured/reported
Effect of low dose 1 alpha-hydroxycholecalciferol on glomerular filtration rate in moderate renal failure	F. U. Eke and M. H. Winterborn	Archives of Disease in Childhood	English	1983	6357106	RCT/qRCT	Europe	1	16	8	No comment on REB approval	Yes			2	Renal disease	Primary school age, Adolescents	6.5-18 year	Not specified	Daily	1000-3999	Daily	PO	D3	52	1750	26 IU/kg	Dose varies by age/weight/bsa	No			No		Yes	Yes	Renal marker, GFR	Blood calcium, Phosphate, Bone mass marker, PTH, Bone biposy	Medium/Unclear	Unclear	Unclear	Yes	Yes	No	Unclear	Not measured/reported
Hypophosphatemic rickets in premature infants weighing less than 1500 grams on oral and parenteral feeding. [German].	A. Westfechtel, T. Tuschen, A. Otten and H. Wolf.	Monatsschrift Kinderheilkunde	German	1984	6328288	Controlled non-randomized	Europe	1	25	9	No comment on REB approval	No comment on consent process	Inpatient - hospital		2	Premature and/or low birth weight	Neonate	0-0 days	Both female/male	Daily	RDA/AI to999	Daily	IV	D3	12	400		constant dose	Yes	30-80 mg per kg body weight	Phosphate	Yes	Immunoassay	Yes	No	Phosphate, ALKP	25OHD	High	Unclear	Unclear	Unclear	Yes	Yes	Yes	Not measured/reported
Hypophosphatemic rickets in premature infants weighing less than 1500 grams on oral and parenteral feeding. [German].	A. Westfechtel, T. Tuschen, A. Otten and H. Wolf.	Monatsschrift Kinderheilkunde	German	1984	6328288	Controlled non-randomized	Europe	1	25	16	No comment on REB approval	No comment on consent process	Inpatient - hospital		2	Premature and/or low birth weight	Neonate	0-0 days	Both female/male	Daily	1000-3999	Daily	PO	D3	12	1000		constant dose	Yes	90 mg/KG(body weight)	phosphate	Yes	Immunoassay	Yes	No	Phosphate, ALKP	25OHD	High	Unclear	Unclear	Unclear	Yes	Yes	Yes	Not measured/reported
Plasma concentrations of vitamin D metabolites before and during treatment of vitamin D deficiency rickets in children	T. Markestad, S. Halvorsen, K. S. Halvorsen, L. Aksnes and D. Aarskog	Acta Paediatrica Scandinavica	English	1984	6331057	Single arm	Europe	3	17	17	No comment on REB approval	No comment on consent process	Inpatient - hospital		1	Rickets	Infants, Toddlers	not stated	Both female/male	Daily	4000-39999	Daily	PO	D2	10	4000	1700-4000	Dose varies by vitamin D stat	Yes	Only to severe hypocalcemia, no defin		Yes	Immunoassay	Yes	No	25OHD	125(OH)2D, Blood calcium, Phosphate, ALKP, PTH, 24-25-(OH)2-D, Urine cAMP	High	No	No	No	Yes	No	Unclear	< 50 nmol/l	16	15.7		9.5
25-Hydroxyvitamin D levels during breast-feeding with or without maternal or infantile supplementation of vitamin D	M. La-Houhala	Journal of Pediatric Gastroenterology & Nutrition	English	1985	3989622	RCT/qRCT	Europe	1	92	32	No comment on REB approval	Yes	Outpatient - hospital clinic		3	Healthy/Subclinical VDD	Neonate	0-7 days	Both female/male	None	none/placebo					0		No drug, control arm	No			Yes	Immunoassay	Yes	No	25OHD	Blood calcium, Phosphate, ALKP, Magnesium	Medium/Unclear	Unclear	Unclear	No	Unclear	Yes	Yes	< 50 nmol/l		33.25		18.25
25-Hydroxyvitamin D levels during breast-feeding with or without maternal or infantile supplementation of vitamin D	M. La-Houhala	Journal of Pediatric Gastroenterology & Nutrition	English	1985	3989622	RCT/qRCT	Europe	1	92	31	No comment on REB approval	Yes	Outpatient - hospital clinic		3	Healthy/Subclinical VDD	Neonate	0-7 days	Both female/male	Daily	Under RDA/AI	Daily	PO	Unclear	20	400		constant dose	No			Yes	Immunoassay	Yes	No	25OHD	Blood calcium, Phosphate, ALKP, Magnesium	Medium/Unclear	Unclear	Unclear	No	Unclear	Yes	Yes	< 50 nmol/l		26.25		19.75
25-Hydroxyvitamin D levels during breast-feeding with or without maternal or infantile supplementation of vitamin D	M. La-Houhala	Journal of Pediatric Gastroenterology & Nutrition	English	1985	3989622	RCT/qRCT	Europe	1	92	29	No comment on REB approval	Yes	Outpatient - hospital clinic		3	Healthy/Subclinical VDD	Neonate	0-7 days	Both female/male	Daily	1000-3999	Daily	PO	Unclear	20	1000		constant dose	No			Yes	Immunoassay	Yes	No	25OHD	Blood calcium, Phosphate, ALKP, Magnesium	Medium/Unclear	Unclear	Unclear	No	Unclear	Yes	Yes	< 50 nmol/l		26.5		17.5
Absorption, dosage, and effect on mineral homeostasis of 25-hydroxycholecalciferol in premature infants: comparison with 400 and 800 IU vitamin D2 supplementation.	L. S. Hillman, B. Hollis, S. Salmons, L. Martin, E. Slatopolsky, W. McAlister and J. Haddad.	Journal of Pediatrics	English	1985	3889260	RCT/qRCT	North America	1	67	21	No comment on REB approval	Yes	Inpatient - hospital		4	Premature and/or low birth weight	Neonate, Infants	0-2 months	Not specified	Daily	RDA/AI to999	Daily	PO	D2	4	400		constant dose	No			Yes	Other	Yes	Yes	25OHD	125(OH)2D, Blood calcium, Urine calcium, Phosphate, Bone mass marker, PTH	High	Unclear	Unclear	No	Unclear	Yes	Yes	< 50 nmol/l	20	32
Absorption, dosage, and effect on mineral homeostasis of 25-hydroxycholecalciferol in premature infants: comparison with 400 and 800 IU vitamin D2 supplementation.	L. S. Hillman, B. Hollis, S. Salmons, L. Martin, E. Slatopolsky, W. McAlister and J. Haddad.	Journal of Pediatrics	English	1985	3889260	RCT/qRCT	North America	1	67	15	No comment on REB approval	Yes	Inpatient - hospital		4	Premature and/or low birth weight	Neonate, Infants	0-2 months	Not specified	Daily	RDA/AI to999	Daily	PO	D2	4	800		constant dose	No			Yes	Other	Yes	Yes	25OHD	125(OH)2D, Blood calcium, Urine calcium, Phosphate, Bone mass marker, PTH	High	Unclear	Unclear	No	Unclear	Yes	Yes	< 50 nmol/l	15	43
Absorption, dosage, and effect on mineral homeostasis of 25-hydroxycholecalciferol in premature infants: comparison with 400 and 800 IU vitamin D2 supplementation.	L. S. Hillman, B. Hollis, S. Salmons, L. Martin, E. Slatopolsky, W. McAlister and J. Haddad.	Journal of Pediatrics	English	1985	3889260	RCT/qRCT	North America	1	67	16	No comment on REB approval	Yes	Inpatient - hospital		4	Premature and/or low birth weight	Neonate, Infants	0-2 months	Not specified	placebo	none/placebo	Daily	PO		4			Placebo	No		25OHD3	Yes	Other	Yes	Yes	25OHD	125(OH)2D, Blood calcium, Urine calcium, Phosphate, Bone mass marker, PTH	High	Unclear	Unclear	No	Unclear	Yes	Yes	< 50 nmol/l	16	35
Absorption, dosage, and effect on mineral homeostasis of 25-hydroxycholecalciferol in premature infants: comparison with 400 and 800 IU vitamin D2 supplementation.	L. S. Hillman, B. Hollis, S. Salmons, L. Martin, E. Slatopolsky, W. McAlister and J. Haddad.	Journal of Pediatrics	English	1985	3889260	RCT/qRCT	North America	1	67	15	No comment on REB approval	Yes	Inpatient - hospital		4	Premature and/or low birth weight	Neonate, Infants	0-2 months	Not specified	placebo	none/placebo	Daily	PO		4			Placebo	No		25OHD3	Yes	Other	Yes	Yes	25OHD	125(OH)2D, Blood calcium, Urine calcium, Phosphate, Bone mass marker, PTH	High	Unclear	Unclear	No	Unclear	Yes	Yes	< 50 nmol/l	16	43.75
Treatment of childhood renal osteodystrophy with calcitriol or ergocalciferol.	E. M. Hodson, R. A. Evans, C. R. Dunstan, E. Hills, S. Y. Wong, A. R. Rosenberg and L. P. Roy.	Clinical Nephrology	English	1985	3877585	RCT/qRCT	Australia/New Zealand	1	24	11	Yes	Yes	Outpatient - hospital clinic		2	Renal disease	Toddlers, Primary school age, Adolescents	not stated	Both female/male	Daily	Above 40000	Daily	PO	D2	52	110000	6000-11-01	Dose varies by vitamin D stat	No			Yes	Other	Yes	No	Bone mass marker, Bone histology	25OHD, Blood calcium, Phosphate, Clinical Rickets, ALKP, PTH	High	Unclear	Unclear	No	Yes	No	Unclear	> 80 nmol/l	7	212.5		140
Treatment of childhood renal osteodystrophy with calcitriol or ergocalciferol.	E. M. Hodson, R. A. Evans, C. R. Dunstan, E. Hills, S. Y. Wong, A. R. Rosenberg and L. P. Roy.	Clinical Nephrology	English	1985	3877585	RCT/qRCT	Australia/New Zealand	1	24	13	Yes	Yes	Outpatient - hospital clinic		2	Renal disease	Toddlers, Primary school age, Adolescents	not stated	Both female/male	placebo	none/placebo							Placebo	No		Calcitriol	Yes	Other	Yes	No	Bone mass marker, Bone histology	25OHD, Blood calcium, Phosphate, Clinical Rickets, ALKP, PTH	High	Unclear	Unclear	No	Yes	No	Unclear	Not measured/reported
Vitamin D deficiency rickets: single-dose therapy versus continuous therapy	W. Stogmann, M. Sacher, P. Blumel and W. Woloszczuk	Padiatrie und Padologie	German	1985	3001619	Controlled non-randomized	Europe	1	10	5	No comment on REB approval	Yes	Inpatient - hospital		2	Rickets	Infants, Toddlers	not stated	Both female/male	Intermittent	Above 40000	Single	PO	D2		200000		constant dose	No			Yes	Other	Yes	No	25OHD, Calcitonin	Blood calcium, Phosphate, ALKP, PTH	Medium/Unclear	Unclear	Unclear	No	Yes	Yes	Yes	< 50 nmol/l	5	10
Vitamin D deficiency rickets: single-dose therapy versus continuous therapy	W. Stogmann, M. Sacher, P. Blumel and W. Woloszczuk	Padiatrie und Padologie	German	1985	3001619	Controlled non-randomized	Europe	1	10	5	No comment on REB approval	Yes	Inpatient - hospital		2	Rickets	Infants, Toddlers	not stated	Both female/male	Daily	4000-39999	Daily	PO	D2	2.5	9600		constant dose	No			Yes	Other	Yes	No	25OHD, Calcitonin	Blood calcium, Phosphate, ALKP, PTH	Medium/Unclear	Unclear	Unclear	No	Yes	Yes	Yes	< 50 nmol/l	5	5.5
Vitamin D metabolism in children with malabsorption syndrome	M. Goncerzewicz, J. Ryzko and R. Lorenc	Klinische Padiatrie	German	1985	3974166	Controlled non-randomized	Europe	1	30	15	No comment on REB approval	No comment on consent process				Malabsorption	Neonate, Infants, Toddlers, Primary school age, Adolescents	0-18 years	Both female/male	Intermittent	4000-39999	Single	PO	D3		29400	1200 IU/k	Dose varies by age/weight/bsa	No			Yes	LC/MS	No	No	25OHD	Previtamin D	Medium/Unclear	No	No	No	Unclear	Yes	Unclear	50 - 80 nmol/l	15	77.75		28.5
Vitamin D metabolism in children with malabsorption syndrome	M. Goncerzewicz, J. Ryzko and R. Lorenc	Klinische Padiatrie	German	1985	3974166	Controlled non-randomized	Europe	1	30	15	No comment on REB approval	No comment on consent process				Malabsorption	Neonate, Infants, Toddlers, Primary school age, Adolescents	0-18 years	Both female/male	Intermittent	4000-39999	Single	PO	D3		29400	12000 IU/	Dose varies by age/weight/bsa	No			Yes	LC/MS	No	No	25OHD	Previtamin D	Medium/Unclear	No	No	No	Unclear	Yes	Unclear	> 80 nmol/l	15	121.75		57.5
Hypercalcemia in infants with congenital hypothyroidism and its relation to vitamin D and thyroid hormones	C. Tau, M. Garabedian, J. P. Farriaux, P. Czernichow, R. Pomarede and S. Balsan	The Journal of Pediatrics	English	1986	3490559	RCT/qRCT	Europe	2	25	13	No comment on REB approval	Yes			2	Other, Hypothyroidism	Neonate	0-1 months	Both female/male	placebo	none/placebo	Daily	PO		26	0		Placebo	No		L-thyroxine	Yes	Immunoassay	Yes	No	Blood calcium	25OHD , 125(OH)2D, Phosphate, Clinical Rickets, ALKP, Anthropometric measures, T4	Medium/Unclear	Unclear	Unclear	No	Unclear	Unclear	Unclear	< 50 nmol/l		22		8.25
Hypercalcemia in infants with congenital hypothyroidism and its relation to vitamin D and thyroid hormones	C. Tau, M. Garabedian, J. P. Farriaux, P. Czernichow, R. Pomarede and S. Balsan	The Journal of Pediatrics	English	1986	3490559	RCT/qRCT	Europe	2	25	12	No comment on REB approval	Yes			2	Other, Hypothyroidism	Neonate	0-1 months	Both female/male	Daily	1000-3999	Daily	PO	D2	26	1200		constant dose	No		L-thyroxine	Yes	Immunoassay	Yes	No	Blood calcium	25OHD , 125(OH)2D, Phosphate, Clinical Rickets, ALKP, Anthropometric measures, T4	Medium/Unclear	Unclear	Unclear	No	Unclear	Unclear	Unclear	< 50 nmol/l		22		8.25
Mineral homeostasis in very low birth weight infants fed either own mother's milk or pooled pasteurized preterm milk.	J. M. Pettifor, H. Stein, A. Herman, F. P. Ross, T. Blumenfeld and G. P. Moodley.	Journal of Pediatric Gastroenterology & Nutrition	English	1986	3514833	RCT/qRCT	Africa	1	68	33	No comment on REB approval	No comment on consent process	Inpatient - hospital		2	Premature and/or low birth weight	Neonate	4-4 days	Not specified	Daily	RDA/AI to999	Daily	PO	D2	27	750		constant dose	No			Yes	Other	Yes	No	25OHD	Blood calcium, Phosphate, Bone mass marker, ALKP, Magnesium, Serum bone-gla-protein	Medium/Unclear	Yes	Unclear	Unclear	Yes	Yes	Yes	< 50 nmol/l	22	27.25		19.5
Mineral homeostasis in very low birth weight infants fed either own mother's milk or pooled pasteurized preterm milk.	J. M. Pettifor, H. Stein, A. Herman, F. P. Ross, T. Blumenfeld and G. P. Moodley.	Journal of Pediatric Gastroenterology & Nutrition	English	1986	3514833	RCT/qRCT	Africa	1	68	35	No comment on REB approval	No comment on consent process	Inpatient - hospital		2	Premature and/or low birth weight	Neonate	4-4 days	Not specified	Daily	RDA/AI to999	Daily	PO	D2	27	750		constant dose	No			Yes	Other	Yes	No	25OHD	Blood calcium, Phosphate, Bone mass marker, ALKP, Magnesium, Serum bone-gla-protein	Medium/Unclear	Yes	Unclear	Unclear	Yes	Yes	Yes	< 50 nmol/l	17	26.5		23.25
Vitamin D nutrition and vitamin D metabolism in the premature human neonate.	E. B. Mawer, W. Stanbury, M. J. Robinson, J. James and C. Close.	Clinical Endocrinology	English	1986	3652468	RCT/qRCT	Europe	1	38	19	Yes	Yes	Inpatient - hospital		2	Premature and/or low birth weight	Neonate	0-21 days	Not specified	Daily	1000-3999	Daily	PO	D2	6	1000		constant dose	No			Yes	Other	Yes	No	25OHD	125(OH)2D, Blood calcium	High	Unclear	Unclear	Unclear	Unclear	No	Yes	< 50 nmol/l	19	25.8		18
Vitamin D nutrition and vitamin D metabolism in the premature human neonate.	E. B. Mawer, W. Stanbury, M. J. Robinson, J. James and C. Close.	Clinical Endocrinology	English	1986	3652468	RCT/qRCT	Europe	1	38	19	Yes	Yes	Inpatient - hospital		2	Premature and/or low birth weight	Neonate	0-21 days	Not specified	Daily	1000-3999	Daily	PO	D2	6	3000		constant dose	No			Yes	Other	Yes	No	25OHD	125(OH)2D, Blood calcium	High	Unclear	Unclear	Unclear	Unclear	No	Yes	< 50 nmol/l	19	25.8		18
Intermittent high-dose vitamin D prophylaxis during infancy: effect on vitamin D metabolites, calcium, and phosphorus	T. Markestad, V. Hesse, M. Siebenhuner, G. Jahreis, L. Aksnes, W. Plenert and D. Aarskog	American Journal of Clinical Nutrition	English	1987	3499065	Single arm	Europe	1	43	43	Yes	Yes	Outpatient - hospital clinic		1	Healthy/Subclinical VDD	Infants, Toddlers	1-20 months	Both female/male	Intermittent	Above 40000	Single	PO	D2		600000		constant dose	No			Yes	Immunoassay	Yes	No	25OHD	125(OH)2D, Blood calcium, Phosphate, Vitamin D metabolites	High	No	No	No	Yes	Yes	Yes	50 - 80 nmol/l	43	51.5		27.6
Preliminary experiences in the prevention of rickets with reduced vitamin D doses	P. Schmidt, I. Szilagyi, M. Ecsi and R. Varga	Kinderarztliche Praxis	German	1988	2842538	Controlled non-randomized	Europe		120	40	No comment on REB approval	No comment on consent process	Outpatient - hospital clinic		3	Healthy/Subclinical VDD	Neonate	0-1 months	Both female/male	Weekly	Above 40000	Weekly	IM	D3	52	200000	200000 IU	Dose varies by vitamin D stat	No			No		Yes	Yes	Blood calcium	Urine calcium, Phosphate	High	Unclear	Unclear	No	Unclear	Yes	Unclear	Not measured/reported
Preliminary experiences in the prevention of rickets with reduced vitamin D doses	P. Schmidt, I. Szilagyi, M. Ecsi and R. Varga	Kinderarztliche Praxis	German	1988	2842538	Controlled non-randomized	Europe		120	40	No comment on REB approval	No comment on consent process	Outpatient - hospital clinic		3	Healthy/Subclinical VDD	Neonate	0-1 months	Both female/male	Weekly	4000-39999	Weekly	PO	D3	52	6000		constant dose	No			No		Yes	Yes	Blood calcium	Urine calcium, Phosphate	High	Unclear	Unclear	No	Unclear	Yes	Unclear	Not measured/reported
Preliminary experiences in the prevention of rickets with reduced vitamin D doses	P. Schmidt, I. Szilagyi, M. Ecsi and R. Varga	Kinderarztliche Praxis	German	1988	2842538	Controlled non-randomized	Europe		120	40	No comment on REB approval	No comment on consent process	Outpatient - hospital clinic		3	Healthy/Subclinical VDD	Neonate	0-1 months	Both female/male	Weekly	1000-3999	Weekly	PO	D3	52	3000		constant dose	No			No		Yes	Yes	Blood calcium	Urine calcium, Phosphate	High	Unclear	Unclear	No	Unclear	Yes	Unclear	Not measured/reported
Bone disease in chronic childhood cholestasis. I. Vitamin D absorption and metabolism.	J. E. Heubi, B. W. Hollis, B. Specker and R. C. Tsang.	Hepatology	English	1989	2783577	Single arm	North America	1	6	6	Yes	Yes	Inpatient - hospital		1	Malabsorption, Chronic cholestasis	Primary school age, Adolescents	not stated	Both female/male	Intermittent	Above 40000	Single	PO	D2		61100	1000 IU/K	Dose varies by age/weight/bsa	No		Vitamins AEK	Yes	Other	Yes	No	Vitamin D absorption	25OHD , 125(OH)2D, Blood calcium, Phosphate, Clinical Rickets, Bone mass marker, PTH, Magnesium	High	No	No	No	Yes	Yes	Yes	> 80 nmol/l	6	82.75
Bone disease in chronic childhood cholestasis. I. Vitamin D absorption and metabolism.	J. E. Heubi, B. W. Hollis, B. Specker and R. C. Tsang.	Hepatology	English	1989	2783577	Single arm	North America	1	6	6	Yes	Yes	Inpatient - hospital		1	Other, Random Conditions	Toddlers, Primary school age, Adolescents	not stated	Both female/male	Intermittent	Above 40000	Single	PO	D2		49500	1000 IU/k	Dose varies by age/weight/bsa	No			Yes	Other	Yes	No	Vitamin D absorption	25OHD , 125(OH)2D, Blood calcium, Phosphate, Clinical Rickets, Bone mass marker, PTH, Magnesium	High	No	No	No	Yes	Yes	Yes	> 80 nmol/l	4	86.5
Bone mineralization and mineral homeostasis in very low-birth-weight infants fed either human milk or fortified human milk.	JM. Pettifor, R. Rajah, A. Venter, G. P. Moodley, L. Opperman, M. Cavaleros and F. P. Ross.	Journal of Pediatric Gastroenterology and Nutrition	English	1989	2709252	RCT/qRCT	Africa	1	100		Yes	Yes	Inpatient - hospital		2	Premature and/or low birth weight	Neonate	4-4 days	Not specified	Daily	RDA/AI to999	Daily	PO	D2		750		constant dose	No			Yes	Immunoassay	Yes	Yes	Bone mass marker	25OHD , 125(OH)2D, Blood calcium, Urine calcium, Phosphate, ALKP	Medium/Unclear	Yes	Unclear	No	Yes	Yes	Yes	< 50 nmol/l	15	42.5		17.5
Bone mineralization and mineral homeostasis in very low-birth-weight infants fed either human milk or fortified human milk.	JM. Pettifor, R. Rajah, A. Venter, G. P. Moodley, L. Opperman, M. Cavaleros and F. P. Ross.	Journal of Pediatric Gastroenterology and Nutrition	English	1989	2709252	RCT/qRCT	Africa	1	100		Yes	Yes	Inpatient - hospital		2	Premature and/or low birth weight	Neonate	4-4 days	Not specified	Daily	RDA/AI to999	Daily	PO	D2		750		constant dose	No			Yes	Immunoassay	Yes	Yes	Bone mass marker	25OHD , 125(OH)2D, Blood calcium, Urine calcium, Phosphate, ALKP	Medium/Unclear	Yes	Unclear	No	Yes	Yes	Yes	< 50 nmol/l	15	40		18.25
Effect of high-dose vitamin D supplementation on radiographically detectable bone disease of very low birth weight infants.	J. R. Evans, A. C. Allen, D. A. Stinson, D. C. Hamilton, B. B. St John, M. J. Vincer, M. A. Raad, C. M. Gundberg and D. E. Cole.	Journal of Pediatrics	English	1989	2809913	RCT/qRCT	North America	1	87	42	No comment on REB approval	Yes	Inpatient - hospital		2	Premature and/or low birth weight	Neonate	3-3 days	Not specified	Daily	RDA/AI to999	Daily	PO	D2	6	400		constant dose	No			Yes	Immunoassay	Yes	Yes	Clinical Rickets	25OHD, Blood calcium, Urine calcium, Phosphate, ALKP	Low	Yes	No	No	Yes	No	Unclear	Not measured/reported
Effect of high-dose vitamin D supplementation on radiographically detectable bone disease of very low birth weight infants.	J. R. Evans, A. C. Allen, D. A. Stinson, D. C. Hamilton, B. B. St John, M. J. Vincer, M. A. Raad, C. M. Gundberg and D. E. Cole.	Journal of Pediatrics	English	1989	2809913	RCT/qRCT	North America	1	87	45	No comment on REB approval	Yes	Inpatient - hospital		2	Premature and/or low birth weight	Neonate	3-3 days	Not specified	Daily	1000-3999	Daily	PO	D2	6	2000		constant dose	No			Yes	Immunoassay	Yes	Yes	Clinical Rickets	25OHD, Blood calcium, Urine calcium, Phosphate, ALKP	Low	Yes	No	No	Yes	No	Unclear	Not measured/reported
Persistent limb pain and raised serum alkaline phosphatase the earliest markers of subclinical hypovitaminosis D in Kashmir	H. Masood, A. P. Narang, I. A. Bhat and G. N. Shah	Indian Journal of Physiology & Pharmacology	English	1989	2620972	Single arm	East Asia	1	100	100	No comment on REB approval	No comment on consent process	Outpatient - hospital clinic		1	Healthy/Subclinical VDD	Primary school age, Adolescents	5-14 years	Both female/male	Intermittent	Above 40000	Single	IM	Unclear		300000		constant dose	No			No		Yes	No	Limb pain	Blood calcium, Phosphate, ALKP, Renal marker, Hematology, Immune/Inflammatory marker, Antistreptolysin O-titer, Glucose, Liver enzymes	High	No	No	No	Yes	No	Unclear	Not measured/reported
Prophylaxis of vitamin D deficiency in hypothyroidism in the newborn infant	J. Leger, C. Tau, M. Garabedian, J. P. Farriaux and P. Czernichow	Archives Francaises de Pediatrie	French	1989	2604508	RCT/qRCT	Europe	2	24	13	No comment on REB approval	Yes			2	Other, Hypothyroidism	Neonate	0-1 months	Both female/male	placebo	none/placebo	Daily	PO		26			Placebo	No		L-thyroxine	Yes	Other	Yes	No	Blood calcium	25OHD , 125(OH)2D, Phosphate, T4	Medium/Unclear	Unclear	Unclear	No	Unclear	No	Unclear	< 50 nmol/l	13	25		10
Prophylaxis of vitamin D deficiency in hypothyroidism in the newborn infant	J. Leger, C. Tau, M. Garabedian, J. P. Farriaux and P. Czernichow	Archives Francaises de Pediatrie	French	1989	2604508	RCT/qRCT	Europe	2	24	11	No comment on REB approval	Yes			2	Other, Hypothyroidism	Neonate	0-1 months	Both female/male	Daily	1000-3999	Daily	PO	D2	26	1200		constant dose	No		L-thyroxine	Yes	Other	Yes	No	Blood calcium	25OHD , 125(OH)2D, Phosphate, T4	Medium/Unclear	Unclear	Unclear	No	Unclear	No	Unclear	< 50 nmol/l	11	25		7.5
The effect of osteopenia prevention in very small premature infants on hormonal parameters of calcium metabolism and bone mineralization[German].	L. Reinken, M. Obladen, F. Dockx-Reinken and C. Lindemann.	Klinische Padiatrie	German	1989	2739343	RCT/qRCT	Europe	1	23	8	No comment on REB approval	Yes	Outpatient - hospital clinic		3	Premature and/or low birth weight	Neonate	0-0 days	Both female/male	Daily	1000-3999	Daily	PO	D3	7	1000		constant dose	Yes	0.4 mmol/dl	Glucose 1-phosphate	Yes	Immunoassay	Yes	No	25OHD	Blood calcium, Phosphate, ALKP, PTH, Calcitonin	Medium/Unclear	Unclear	Unclear	Yes	Yes	Yes	Yes	> 80 nmol/l	8	107.75		52
The effect of osteopenia prevention in very small premature infants on hormonal parameters of calcium metabolism and bone mineralization[German].	L. Reinken, M. Obladen, F. Dockx-Reinken and C. Lindemann.	Klinische Padiatrie	German	1989	2739343	RCT/qRCT	Europe	1	23	7	No comment on REB approval	Yes	Outpatient - hospital clinic		3	Premature and/or low birth weight	Neonate	0-0 days	Both female/male	Daily	1000-3999	Daily	PO	D3	7	1000		constant dose	Yes	0.4 mmol/dl	Glucose-1-phosphate	Yes	Immunoassay	Yes	No	25OHD	Blood calcium, Phosphate, ALKP, PTH, Calcitonin	Medium/Unclear	Unclear	Unclear	Yes	Yes	Yes	Yes	> 80 nmol/l	7	88.25		38.25
The effect of osteopenia prevention in very small premature infants on hormonal parameters of calcium metabolism and bone mineralization[German].	L. Reinken, M. Obladen, F. Dockx-Reinken and C. Lindemann.	Klinische Padiatrie	German	1989	2739343	RCT/qRCT	Europe	1	23	8	No comment on REB approval	Yes	Outpatient - hospital clinic		3	Premature and/or low birth weight	Neonate	0-0 days	Both female/male	Daily	1000-3999	Daily	PO	D3	7	1000		constant dose	No			Yes	Immunoassay	Yes	No	25OHD	Blood calcium, Phosphate, ALKP, PTH, Calcitonin	Medium/Unclear	Unclear	Unclear	Yes	Yes	Yes	Yes	> 80 nmol/l	8	226		96.5
Vitamin-D-deficiency rickets in Kuwait: the prevalence of a preventable disease	M. M. Lubani, T. S. al-Shab, Q. A. al-Saleh, D. C. Sharda, S. A. Quattawi, S. A. Ahmed, M. A. Moussa and P. C. Reavey	Annals of Tropical Paediatrics	English	1989	2475056	RCT/qRCT	Middle East	1	250	125	No comment on REB approval	No comment on consent process	Outpatient - hospital clinic		2	Rickets	Infants, Toddlers	1-24 months	Both female/male	Intermittent	Above 40000	Single	IM	Unclear		600000		constant dose	No			No		Yes	No	Clinical Rickets	Blood calcium, Phosphate, ALKP	High	Unclear	Unclear	No	Unclear	No	Unclear	Not measured/reported
Vitamin-D-deficiency rickets in Kuwait: the prevalence of a preventable disease	M. M. Lubani, T. S. al-Shab, Q. A. al-Saleh, D. C. Sharda, S. A. Quattawi, S. A. Ahmed, M. A. Moussa and P. C. Reavey	Annals of Tropical Paediatrics	English	1989	2475056	RCT/qRCT	Middle East	1	250	125	No comment on REB approval	No comment on consent process	Outpatient - hospital clinic		2	Rickets	Infants, Toddlers	1-24 months	Both female/male	Daily	1000-3999	Daily	PO	Unclear	52	2000	2000 IU f	Dose varies by age/weight/bsa	No			No		Yes	No	Clinical Rickets	Blood calcium, Phosphate, ALKP	High	Unclear	Unclear	No	Unclear	No	Unclear	Not measured/reported
Bone disease in chronic childhood cholestasis. II. Better absorption of 25-OH vitamin D than vitamin D in extrahepatic biliary atresia.	J. E. Heubi, B. W. Hollis and R. C. Tsang.	Pediatric research	English	1990	2296467	Single arm	North America	1	6	6	Yes	Yes	Inpatient - hospital		1	Malabsorption, Chronic cholestasis	Infants, Toddlers	0.33-1.83 y	Both female/male	Intermittent	4000-39999	Single	PO	D2		11300	1000 IU/K	Dose varies by age/weight/bsa	No			Yes	Other	Yes	No	Vitamin D absorption	25OHD , 125(OH)2D, Blood calcium, Phosphate, Clinical Rickets, Bone mass marker, PTH, Magnesium	High	No	No	No	Yes	No	Yes	< 50 nmol/l	6	32.5
Bone disease in chronic childhood cholestasis. II. Better absorption of 25-OH vitamin D than vitamin D in extrahepatic biliary atresia.	J. E. Heubi, B. W. Hollis and R. C. Tsang.	Pediatric research	English	1990	2296467	Single arm	North America	1	5	5	Yes	Yes	Inpatient - hospital		1	Malabsorption, Chronic cholestasis	Toddlers, Primary school age	1-8.33 year	Both female/male	Intermittent	4000-39999	Single	PO	D2		25700	1000 IU/k	Dose varies by age/weight/bsa	No			Yes	Other	Yes	No	Vitamin D absorption	25OHD , 125(OH)2D, Blood calcium, Phosphate, Clinical Rickets, Bone mass marker, PTH, Magnesium	High	No	No	No	Yes	No	Yes	50 - 80 nmol/l	5	62.7
Bone disease in chronic childhood cholestasis. II. Better absorption of 25-OH vitamin D than vitamin D in extrahepatic biliary atresia.	J. E. Heubi, B. W. Hollis and R. C. Tsang.	Pediatric research	English	1990	2296467	Single arm	North America	1	6	6	Yes	Yes	Inpatient - hospital		1	Other, Divers conditions	Primary school age, Adolescents	10.1-19.1 y	Both female/male	Intermittent	Above 40000	Single	PO	D2		67300	1000 IU/K	Dose varies by age/weight/bsa	No			Yes	Other	Yes	No	Vitamin D absorption	25OHD , 125(OH)2D, Blood calcium, Phosphate, Clinical Rickets, Bone mass marker, PTH, Magnesium	High	No	No	No	Yes	No	Yes	Not measured/reported
How much vitamin D for neonates?.	W. B. Pittard 3rd, K. M. Geddes, T. C. Hulsey, B. W. Hollis	American journal of diseases of children	English	1991	1928007	RCT/qRCT	North America	1	25	11	Yes	Yes			4	Healthy/Subclinical VDD	Neonate	0-0 days	Both female/male	Daily	Under RDA/AI	Daily	PO	Unclear	16	400		constant dose	No			Yes	Not stated	Yes	No	25OHD	Blood calcium, Phosphate, PTH	Medium/Unclear	Unclear	Unclear	No	Unclear	No	Yes	< 50 nmol/l	11	27.5		22.5
How much vitamin D for neonates?.	W. B. Pittard 3rd, K. M. Geddes, T. C. Hulsey, B. W. Hollis	American journal of diseases of children	English	1991	1928007	RCT/qRCT	North America	1	27	8	Yes	Yes	Inpatient - hospital		4	Premature and/or low birth weight	Neonate	0-0 days	Both female/male	Daily	RDA/AI to999	Daily	PO	Unclear	16	400		constant dose	No			Yes	Not stated	Yes	No	25OHD	Blood calcium, Phosphate, PTH	Medium/Unclear	Unclear	Unclear	No	Unclear	No	Yes	< 50 nmol/l	8	27.5		12.5
How much vitamin D for neonates?.	W. B. Pittard 3rd, K. M. Geddes, T. C. Hulsey, B. W. Hollis	American journal of diseases of children	English	1991	1928007	RCT/qRCT	North America	1	25	5	Yes	Yes			4	Healthy/Subclinical VDD	Neonate	0-0 days	Both female/male	Daily	RDA/AI to999	Daily	PO	Unclear	16	800		constant dose	No			Yes	Not stated	Yes	No	25OHD	Blood calcium, Phosphate, PTH	Medium/Unclear	Unclear	Unclear	No	Unclear	No	Yes	< 50 nmol/l	5	22.5		12.5
How much vitamin D for neonates?.	W. B. Pittard 3rd, K. M. Geddes, T. C. Hulsey, B. W. Hollis	American journal of diseases of children	English	1991	1928007	RCT/qRCT	North America	1	27	9	Yes	Yes	Inpatient - hospital		4	Premature and/or low birth weight	Neonate	0-0 days	Both female/male	Daily	RDA/AI to999	Daily	PO	Unclear	16	800		constant dose	No			Yes	Not stated	Yes	No	25OHD	Blood calcium, Phosphate, PTH	Medium/Unclear	Unclear	Unclear	No	Unclear	No	Yes	< 50 nmol/l	9	42.5		20
d-Alpha-tocopheryl polyethylene glycol-1000 succinate enhances the absorption of vitamin D in chronic liver disease of infancy and childhood	E.A. Argao, J.E. Heubi, B.W. Hollis, R.C. Tsang	Pediatric Research	English	1992	1542543	Single arm	North America	1	8	8	Yes	Yes	Inpatient - hospital		1	MalabsorptionChronic childhood cholestas	Infants, Toddlers, Primary school age, Adolescents	0.4-19 year	Both female/male	Daily	Above 40000	Daily	PO	D3	26	500000	1000 IU/K	Dose varies by age/weight/bsa	No		TPGS	Yes	LC/MS	Yes	No	25OHD, pre-25OHD level	25OHD, Blood calcium, Phosphate, Bone mass marker, Vitamin E, Lipids, Magnesium, Phosphorous	High	No	No	No	Yes	Yes	No	50 - 80 nmol/l	7	64.1
Reversal of clinical and dental fluorosis.	S. K. Gupta, R. C. Gupta and A. K. Seth.	Indian Pediatrics	English	1994	7875866	Single arm	East Asia	1	20	20	No comment on REB approval	No comment on consent process	Other	Community	1	Healthy/Subclinical VDD	Toddlers, Primary school age	3-12 years	Not specified	Daily	RDA/AI to999	Daily	PO	D3	13	800		constant dose	Yes	250 mg/day	Ascorbic acid	No		Yes	No	Clinical and dental fluorosis	Blood calcium, ALKP, Ascorcic acid (serum, leucocyte), Fluoride (blood, serum, urine)	High	No	No	No	Yes	Yes	Yes	Not measured/reported
Reversal of clinical and dental fluorosis.	S. K. Gupta, R. C. Gupta and A. K. Seth.	Indian Pediatrics	English	1994	7875866	Single arm	East Asia	1	20	20	No comment on REB approval	No comment on consent process	Other	Community	1	Healthy/Subclinical VDD	Toddlers, Primary school age	3-12 years	Not specified	Daily	RDA/AI to999	Daily	PO	D3	13	800		constant dose	Yes	250 mg/day	Ascorbic acid	No		Yes	No	Clinical and dental fluorosis	Blood calcium, ALKP, Ascorcic acid (serum, leucocyte), Fluoride (blood, serum, urine)	High	No	No	No	Yes	Yes	Yes	Not measured/reported
Rickets in very-low-birth-weight infants born at Baragwanath Hospital.	M. Zuckerman and J. M. Pettifor.	South African Medical Journal	English	1994	7974045	RCT/qRCT	Africa	1	56	27	No comment on REB approval	No comment on consent process	Inpatient - hospital		2	Premature and/or low birth weight	Neonate	14-14 days	Not specified	Daily	RDA/AI to999	Daily	PO	Unclear	26	800		constant dose	No			Yes	Not stated	Yes	No	Clinical Rickets	25OHD , 125(OH)2D, Blood calcium, Phosphate, ALKP, PTH, Magnesium	Medium/Unclear	No	Yes	Unclear	Yes	Yes	Unclear	50 - 80 nmol/l	24	54.25		24.5
Rickets in very-low-birth-weight infants born at Baragwanath Hospital.	M. Zuckerman and J. M. Pettifor.	South African Medical Journal	English	1994	7974045	RCT/qRCT	Africa	1	56	29	No comment on REB approval	No comment on consent process	Inpatient - hospital		2	Premature and/or low birth weight	Neonate	14-14 days	Not specified	Daily	RDA/AI to999	Daily	PO	Unclear	26	800		constant dose	No		Alprem formula (Nestle SA)	Yes	Not stated	Yes	No	Clinical Rickets	25OHD , 125(OH)2D, Blood calcium, Phosphate, ALKP, PTH, Magnesium	Medium/Unclear	No	Yes	Unclear	Yes	Yes	Unclear	< 50 nmol/l	29	42.25		16.75
Vitamin D prophylaxis during infancy: comparison of the long-term effects of three intermittent doses (15,5, or 2.5 mg) on 25-hydroxyvitamin D concentrations	F. Zeghoud, H. Ben-Mekhbi, N. Djeghri and M. Garabedian	American Journal of Clinical Nutrition	English	1994	8074071	Single arm	Africa	1	30	30	No comment on REB approval	Yes	Outpatient - hospital clinic		1	Healthy/Subclinical VDD	Neonate	15-15 days	Both female/male	Intermittent	Above 40000	Single	PO	D3		600000		constant dose	No			Yes	Immunoassay	Yes	No	25OHD	Blood calcium, Phosphate	High	No	No	No	Yes	Yes	Unclear	< 50 nmol/l	30	14
Vitamin D prophylaxis during infancy: comparison of the long-term effects of three intermittent doses (15,5, or 2.5 mg) on 25-hydroxyvitamin D concentrations	F. Zeghoud, H. Ben-Mekhbi, N. Djeghri and M. Garabedian	American Journal of Clinical Nutrition	English	1994	8074071	RCT/qRCT	Africa	1	30	15	No comment on REB approval	Yes	Outpatient - hospital clinic		2	Healthy/Subclinical VDD	Neonate	1-1 days	Both female/male	Intermittent	Above 40000	q3 monthly	PO	D3		100000		constant dose	No			Yes	Immunoassay	Yes	No	25OHD	Blood calcium, Phosphate	Medium/Unclear	Unclear	Unclear	No	No	Yes	No	< 50 nmol/l	15		7
Vitamin D prophylaxis during infancy: comparison of the long-term effects of three intermittent doses (15,5, or 2.5 mg) on 25-hydroxyvitamin D concentrations	F. Zeghoud, H. Ben-Mekhbi, N. Djeghri and M. Garabedian	American Journal of Clinical Nutrition	English	1994	8074071	RCT/qRCT	Africa	1	30	15	No comment on REB approval	Yes	Outpatient - hospital clinic		2	Healthy/Subclinical VDD	Neonate	1-1 days	Both female/male	Intermittent	Above 40000	Single	PO	D3		200000		constant dose	No			Yes	Immunoassay	Yes	No	25OHD	Blood calcium, Phosphate	Medium/Unclear	Unclear	Unclear	No	No	Yes	No	< 50 nmol/l	15		1
Vitamin D and pubertal maturation. Value and tolerance of vitamin D supplementation during the winter season	F. Zeghoud, R. Delaveyne, P. Rehel, J. Chalas, M. Garabedian and M. Odievre	Archives de pÃ©diatrie	French	1995	7742905	RCT/qRCT	Europe	1	15	6	Yes	Yes	Outpatient - hospital clinic		2	Healthy/Subclinical VDD	Primary school age, Adolescents	10-17 years	Both female/male	placebo	none/placebo	Single	PO			0		Placebo	No			Yes	Immunoassay	Yes	No	25OHD	125(OH)2D, Blood calcium, PTH	High	Unclear	Unclear	Unclear	Yes	Yes	Unclear	< 50 nmol/l	6	30		8.5
Vitamin D and pubertal maturation. Value and tolerance of vitamin D supplementation during the winter season	F. Zeghoud, R. Delaveyne, P. Rehel, J. Chalas, M. Garabedian and M. Odievre	Archives de pÃ©diatrie	French	1995	7742905	RCT/qRCT	Europe	1	15	9	Yes	Yes	Outpatient - hospital clinic		2	Healthy/Subclinical VDD	Primary school age, Adolescents	10-17 years	Both female/male	Intermittent	Above 40000	Single	PO	D3		100000		constant dose	No			Yes	Immunoassay	Yes	No	25OHD	125(OH)2D, Blood calcium, PTH	High	Unclear	Unclear	Unclear	Yes	Yes	Unclear	< 50 nmol/l	9	30		16
Effects of two forms of vitamin D supplementation on bone metabolism and infants growth	L. F. Edda, A. G. Pilar, V. C. Pablo, H. R. Felipe, C. A. Marisol, C. J. P. Maria and F. C. Arnaldo	Revista Chilena de Pediatria	Spanish	1996	N/A	RCT/qRCT	Central & South America	1	78	35	Yes	Yes	Inpatient - hospital		2	Healthy/Subclinical VDD	Neonate	15-30 days	Both female/male	Intermittent	Above 40000	q5 monthly	PO	D3		600000		constant dose	No			No		Yes	No	125(OH)2D	Blood calcium, Phosphate, PTH, Anthropometric measures, Cardiovascular marker, Blood pressure	Medium/Unclear	No	No	No	Unclear	No	Yes	Not measured/reported
Effects of two forms of vitamin D supplementation on bone metabolism and infants growth	L. F. Edda, A. G. Pilar, V. C. Pablo, H. R. Felipe, C. A. Marisol, C. J. P. Maria and F. C. Arnaldo	Revista Chilena de Pediatria	Spanish	1996	N/A	RCT/qRCT	Central & South America	1	78	43	Yes	Yes	Inpatient - hospital		2	Healthy/Subclinical VDD	Neonate	15-30 days	Both female/male	Daily	Under RDA/AI	Daily	PO	D3	22	400		constant dose	No			No		Yes	No	125(OH)2D	Blood calcium, Phosphate, PTH, Anthropometric measures, Cardiovascular marker, Blood pressure	Medium/Unclear	No	No	No	Unclear	No	Yes	Not measured/reported
Reversal of fluorosis in children.	S. K. Gupta, R. C. Gupta, A. K. Seth and A. Gupta.	Acta Paediatrica Japonica	English	1996	8942013	RCT/qRCT	East Asia	1	25	15	No comment on REB approval	Yes	Other	Community	2	Healthy/Subclinical VDD	Primary school age	6-12 years	Not specified	Weekly	Above 40000	Weekly	PO	D3	26	60000		constant dose	Yes	125 mg q12h	Ascorbic acid	No		Yes	No	Clinical, dental, skeletal fluorosis.	Blood calcium, ALKP, Ascorcic acid (serum, leucocyte), Fluoride (blood, serum, urine)	Medium/Unclear	Unclear	Unclear	Yes	Yes	No	Yes	Not measured/reported
Reversal of fluorosis in children.	S. K. Gupta, R. C. Gupta, A. K. Seth and A. Gupta.	Acta Paediatrica Japonica	English	1996	8942013	RCT/qRCT	East Asia	1	25	10	No comment on REB approval	Yes	Other	Community	2	Healthy/Subclinical VDD	Primary school age	6-12 years	Not specified	placebo	none/placebo							Placebo	No		Lactose (placebo)	No		Yes	No	Clinical, dental, skeletal fluorosis.	Blood calcium, ALKP, Ascorcic acid (serum, leucocyte), Fluoride (blood, serum, urine)	Medium/Unclear	Unclear	Unclear	Yes	Yes	No	Yes	Not measured/reported
Vitamin D prophylaxis in children with a single dose of 150000 IU of vitamin D	B. Oliveri, H. Cassinelli, C. Mautalen and M. Ayala	European Journal of Clinical Nutrition	English	1996	8968701	Single arm	Central & South America	1	79	79	No comment on REB approval	Yes	Outpatient - hospital clinic		1	Healthy/Subclinical VDD	Primary school age	5-11 years	Both female/male	Intermittent	Above 40000	Single	PO	D2		150000		constant dose	No			Yes	Immunoassay	Yes	Yes	25OHD	Blood calcium, Urine calcium, Phosphate, ALKP, PTH	High	No	No	No	Yes	Unclear	Unclear	< 50 nmol/l	30	46.75		26.75
Fortified milk and supplements of oral vitamin D. Comparison of the effect of two doses of vitamin D (500 and 1,000 UI/d) during the first trimester of life	C. Vervel, F. Zeghoud, H. Boutignon, J. C. Tjani, O. Walrant-Debray and M. Garabedian	Archives de Pediatrie	French	1997	9097822	RCT/qRCT	Europe	1	80	40	Yes	Yes	Inpatient - hospital		2	Healthy/Subclinical VDD	Neonate	3-6 days	Both female/male	Daily	RDA/AI to999	Daily	PO	D2	12	500		constant dose	No			Yes	Other	Yes	No	25OHD	PTH	Medium/Unclear	Unclear	Unclear	Unclear	Yes	Yes	Unclear	< 50 nmol/l	34	30.45		14.9
Fortified milk and supplements of oral vitamin D. Comparison of the effect of two doses of vitamin D (500 and 1,000 UI/d) during the first trimester of life	C. Vervel, F. Zeghoud, H. Boutignon, J. C. Tjani, O. Walrant-Debray and M. Garabedian	Archives de Pediatrie	French	1997	9097822	RCT/qRCT	Europe	1	80	40	Yes	Yes	Inpatient - hospital		2	Healthy/Subclinical VDD	Neonate	3-6 days	Both female/male	Daily	1000-3999	Daily	PO	D2	12	1000		constant dose	No			Yes	Other	Yes	No	25OHD	PTH	Medium/Unclear	Unclear	Unclear	Unclear	Yes	Yes	Unclear	< 50 nmol/l	36	30.575		13.35
Influence of nutrition on urinary oxalate and calcium in preterm and term infants	B. Hoppe, A. Hesse, T. Neuhaus, S. Fanconi, N. Blau, B. Roth and E. Leumann	Pediatric Nephrology	English	1997	9438643	Single arm	Europe	2	37	37	Yes	Yes	Inpatient - hospital		1	Healthy/Subclinical VDD	Neonate, Infants	0-2 months	Not specified	Daily	RDA/AI to999	Daily	PO	D3	8.6	500		constant dose	No			No		Yes	Yes	Urine calcium, Bone mass marker, Urinary Ox	Blood calcium	High	No	No	No	Unclear	No	Yes	Not measured/reported
Subclinical vitamin D deficiency in neonates: definition and response to vitamin D supplements	F. Zeghoud, C. Vervel, H. Guillozo, O. Walrant-Debray, H. Boutignon and M. GarabâˆšÂ©dian	American Journal of Clinical Nutrition	English	1997	9062528	RCT/qRCT	Europe	1	80	40	Yes	Yes	Outpatient - hospital clinic		2	Healthy/Subclinical VDD	Neonate	0-6 days	Both female/male	Daily	RDA/AI to999	Daily	PO	D2	13	500		constant dose	No			Yes	Immunoassay	Yes	No	25OHD	Blood calcium, Phosphate, ALKP, PTH	Medium/Unclear	Yes	Unclear	Unclear	Yes	No	Unclear	< 50 nmol/l	40	29.6		13.8
Subclinical vitamin D deficiency in neonates: definition and response to vitamin D supplements	F. Zeghoud, C. Vervel, H. Guillozo, O. Walrant-Debray, H. Boutignon and M. GarabâˆšÂ©dian	American Journal of Clinical Nutrition	English	1997	9062528	RCT/qRCT	Europe	1	80	40	Yes	Yes	Outpatient - hospital clinic		2	Healthy/Subclinical VDD	Neonate	0-6 days	Both female/male	Daily	1000-3999	Daily	PO	D2	13	1000		constant dose	No			Yes	Immunoassay	Yes	No	25OHD	Blood calcium, Phosphate, ALKP, PTH	Medium/Unclear	Yes	Unclear	Unclear	Yes	No	Unclear	< 50 nmol/l	40	29.5		13.8
Vitamin D administration to tuberculous children and its value	M. M. Morcos, A. A. Gabr, S. Samuel, M. Kamel, M. el Baz, M. el Beshry and R. R. Michail	Bollettino Chimico Farmaceutico	English	1998	9689902	RCT/qRCT	Middle East	1	24	12	No comment on REB approval	No comment on consent process	Combined inpatient-outpatient	Combined inpatient-outpa	2	Other, Tuberculosis	Toddlers, Primary school age	not stated	Both female/male	placebo	none/placebo	Daily			8			Placebo	No		Isoniazid, Rifampicin, Streptomycin	No		Yes	No	125(OH)2D	Blood calcium	Medium/Unclear	Yes	Unclear	No	Yes	Yes	Unclear	Not measured/reported
Vitamin D administration to tuberculous children and its value	M. M. Morcos, A. A. Gabr, S. Samuel, M. Kamel, M. el Baz, M. el Beshry and R. R. Michail	Bollettino Chimico Farmaceutico	English	1998	9689902	RCT/qRCT	Middle East	1	24	12	No comment on REB approval	No comment on consent process	Combined inpatient-outpatient	Combined inpatient-outpa	2	Other, Tuberculosis	Toddlers, Primary school age	not stated	Both female/male	Daily	1000-3999	Daily	PO	Unclear	8	1000		constant dose	No		Isoniazid, Rifampicin, Streptomycin	No		Yes	No	125(OH)2D	Blood calcium	Medium/Unclear	Yes	Unclear	No	Yes	Yes	Unclear	Not measured/reported
Vitamin D status in the adolescent: seasonal variations and effects of winter supplementation with vitamin D3	J. Guillemant, A. Allemandou, S. Cabrol, G. Peres and S. Guillemant	Archives de Pediatrie	French	1998	9853057	RCT/qRCT	Europe	1	56	24	Yes	Yes	School-based		2	Healthy/Subclinical VDD	Adolescents	13-16 years	Males only	Intermittent	Above 40000	q2 monthly	PO	D3		100000		constant dose	No			Yes	Immunoassay	Yes	No	25OHD	PTH	Medium/Unclear	Unclear	Unclear	Unclear	Unclear	No	Unclear	< 50 nmol/l	24	41.5		9.5
Vitamin D status in the adolescent: seasonal variations and effects of winter supplementation with vitamin D3	J. Guillemant, A. Allemandou, S. Cabrol, G. Peres and S. Guillemant	Archives de Pediatrie	French	1998	9853057	RCT/qRCT	Europe	1	56	32	Yes	Yes	School-based		2	Healthy/Subclinical VDD	Adolescents	13-16 years	Males only	placebo	none/placebo	q2 monthly	PO					Placebo	No			Yes	Immunoassay	Yes	No	25OHD	PTH	Medium/Unclear	Unclear	Unclear	Unclear	Unclear	No	Unclear	< 50 nmol/l	32	44.5		11.925
A comparison of calcium, vitamin D, or both for nutritional rickets in Nigerian children	T. D. Thacher, P. R. Fischer, J. M. Pettifor, J. O. Lawson, C. O. Isichei, J. C. Reading and G. M. Chan	The New England Journal of Medicine	English	1999	10451461	RCT/qRCT	Africa	1	123	41	Yes	Yes	Outpatient - hospital clinic		3	Rickets	Toddlers, Primary school age, Adolescents	1-14 years	Both female/male	placebo	none/placebo	q3 monthly	IM			0		Placebo	Yes	200 mg X 5 per day		Yes	Immunoassay	Yes	No	Clinical Rickets	25OHD, Blood calcium, ALKP	Low	Yes	Yes	Yes	Yes	Yes	Yes	< 50 nmol/l	34	40		42.5
A comparison of calcium, vitamin D, or both for nutritional rickets in Nigerian children	T. D. Thacher, P. R. Fischer, J. M. Pettifor, J. O. Lawson, C. O. Isichei, J. C. Reading and G. M. Chan	The New England Journal of Medicine	English	1999	10451461	RCT/qRCT	Africa	1	123	41	Yes	Yes	Outpatient - hospital clinic		3	Rickets	Toddlers, Primary school age, Adolescents	1-14 years	Both female/male	Intermittent	Above 40000	q3 monthly	IM	Unclear		600000		constant dose	No			Yes	Immunoassay	Yes	No	Clinical Rickets	25OHD, Blood calcium, ALKP	Low	Yes	Yes	Yes	Yes	Yes	Yes	< 50 nmol/l	37	35		15
A comparison of calcium, vitamin D, or both for nutritional rickets in Nigerian children	T. D. Thacher, P. R. Fischer, J. M. Pettifor, J. O. Lawson, C. O. Isichei, J. C. Reading and G. M. Chan	The New England Journal of Medicine	English	1999	10451461	RCT/qRCT	Africa	1	123	41	Yes	Yes	Outpatient - hospital clinic		3	Rickets	Toddlers, Primary school age, Adolescents	1-14 years	Both female/male	Intermittent	Above 40000	q3 monthly	IM	Unclear		600000		constant dose	Yes	200 mg X 5 per day		Yes	Immunoassay	Yes	No	Clinical Rickets	25OHD, Blood calcium, ALKP	Low	Yes	Yes	Yes	Yes	Yes	Yes	< 50 nmol/l	38	32.5		12.5
Randomised controlled trial of vitamin D supplementation on bone density and biochemical indices in preterm infants.	M. C. Backstrom, R. Maki, A. L. Kuusela, H. Sievanen, A. M. Koivisto, R. S. Ikonen, T. Kouri and M. Maki.	Archives of Disease in Childhood Fetal &amp; Neonat	English	1999	10212074	RCT/qRCT	Europe	1	43	21	Yes	Yes	Inpatient - hospital		2	Premature and/or low birth weight	Neonate	0-2 days	Not specified	Daily	RDA/AI to999	Daily	PO	Unclear		400	200 IU/Kg	Dose varies by age/weight/bsa	Yes		Breast milk fortification FM 85 or Presemp. Phosphorus supplements.	Yes	LC/MS	Yes	No	25OHD	125(OH)2D, Blood calcium, Phosphate, Bone mass marker, ALKP, PTH, Anthropometric measures	Medium/Unclear	Yes	Yes	Unclear	Yes	No	Unclear	< 50 nmol/l	6	29.8		10
Randomised controlled trial of vitamin D supplementation on bone density and biochemical indices in preterm infants.	M. C. Backstrom, R. Maki, A. L. Kuusela, H. Sievanen, A. M. Koivisto, R. S. Ikonen, T. Kouri and M. Maki.	Archives of Disease in Childhood Fetal &amp; Neonat	English	1999	10212074	RCT/qRCT	Europe	1	43	18	Yes	Yes	Inpatient - hospital		2	Premature and/or low birth weight	Neonate	0-2 days	Not specified	Daily	RDA/AI to999	Daily	PO	Unclear		960		constant dose	Yes		Breast milk fortification FM 85 or Presemp. Phosphorus supplements.	Yes	LC/MS	Yes	No	25OHD	125(OH)2D, Blood calcium, Phosphate, Bone mass marker, ALKP, PTH, Anthropometric measures	Medium/Unclear	Yes	Yes	Unclear	Yes	No	Unclear	< 50 nmol/l	8	29.2		11.8
The long-term effect of early mineral, vitamin D, and breast milk intake on bone mineral status in 9- to 11-year-old children born prematurely.	M. C. Backstrom, R. Maki, A. L. Kuusela, H. Sievanen, A. M. Koivisto, M. Koskinen, R. S. Ikonen and M. Maki.	Journal of Pediatric Gastroenterology and Nutrition	English	1999	10554126	RCT/qRCT	Europe	1	70	22	Yes	Yes	Inpatient - hospital		4	Premature and/or low birth weight	Neonate	0-0 days	Both female/male	Daily	RDA/AI to999	Daily	PO	Unclear	11.4	500		constant dose	No			Yes	LC/MS	No	No	Bone mass marker	25OHD , 125(OH)2D, Anthropometric measures	Medium/Unclear	Yes	Yes	No	Yes	Yes	Unclear	Not measured/reported
The long-term effect of early mineral, vitamin D, and breast milk intake on bone mineral status in 9- to 11-year-old children born prematurely.	M. C. Backstrom, R. Maki, A. L. Kuusela, H. Sievanen, A. M. Koivisto, M. Koskinen, R. S. Ikonen and M. Maki.	Journal of Pediatric Gastroenterology and Nutrition	English	1999	10554126	RCT/qRCT	Europe	1	70	12	Yes	Yes	Inpatient - hospital		4	Premature and/or low birth weight	Neonate	0-0 days	Both female/male	Daily	RDA/AI to999	Daily	PO	Unclear	11.7	500		constant dose	Yes	108 mg/kg/day	Phosphorus	Yes	LC/MS	No	No	Bone mass marker	25OHD , 125(OH)2D, Anthropometric measures	Medium/Unclear	Yes	Yes	No	Yes	Yes	Unclear	Not measured/reported
The long-term effect of early mineral, vitamin D, and breast milk intake on bone mineral status in 9- to 11-year-old children born prematurely.	M. C. Backstrom, R. Maki, A. L. Kuusela, H. Sievanen, A. M. Koivisto, M. Koskinen, R. S. Ikonen and M. Maki.	Journal of Pediatric Gastroenterology and Nutrition	English	1999	10554126	RCT/qRCT	Europe	1	70	23	Yes	Yes	Inpatient - hospital		4	Premature and/or low birth weight	Neonate	0-0 days	Both female/male	Daily	1000-3999	Daily	PO	Unclear	11.4	1000		constant dose	No			Yes	LC/MS	No	No	Bone mass marker	25OHD , 125(OH)2D, Anthropometric measures	Medium/Unclear	Yes	Yes	No	Yes	Yes	Unclear	Not measured/reported
The long-term effect of early mineral, vitamin D, and breast milk intake on bone mineral status in 9- to 11-year-old children born prematurely.	M. C. Backstrom, R. Maki, A. L. Kuusela, H. Sievanen, A. M. Koivisto, M. Koskinen, R. S. Ikonen and M. Maki.	Journal of Pediatric Gastroenterology and Nutrition	English	1999	10554126	RCT/qRCT	Europe	1	70	13	Yes	Yes	Inpatient - hospital		4	Premature and/or low birth weight	Neonate	0-0 days	Both female/male	Daily	1000-3999	Daily	PO	Unclear	11.4	1000		constant dose	Yes	108 mg/Kg/day	Phosphorus	Yes	LC/MS	No	No	Bone mass marker	25OHD , 125(OH)2D, Anthropometric measures	Medium/Unclear	Yes	Yes	No	Yes	Yes	Unclear	Not measured/reported
Bone turnover in children with vitamin D deficiency rickets before and during treatment	G. I. Baroncelli, S. Bertelloni, C. Ceccarelli, V. Amato and G. Saggese	Acta Paediatrica	English	2000	10852183	Single arm	Europe	1	14	14	Yes	Yes			2	Rickets	Neonate	not stated	Both female/male	Daily	4000-39999	Daily	PO	D3	8	4000	3000-4000	Dose varies by vitamin D stat	Yes	1000 mg/day		Yes	Immunoassay	Yes	No	Bone mass marker, Serum osteocalcin/PICP/ICTP and urine NTX	25OHD, Blood calcium, Phosphate, ALKP	High	No	No	No	Yes	No	Unclear	< 50 nmol/l	14	40		8.75
Prevention of vitamin D deficiency in adolescents and pre-adolescents. An interventional multicenter study on the biological effect of repeated doses of 100,000 IU of vitamin D3	J. F. Duhamel, F. Zeghoud, M. Sempe, B. Boudailliez, M. Odievre, M. Laurans, M. Garabedian and E. Mallet	Archives de Pediatrie	French	2000	10701059	RCT/qRCT	Europe	4	68	33	Yes	Yes	Inpatient - hospital		2	Healthy/Subclinical VDD	Primary school age, Adolescents	10-15 years	Both female/male	Intermittent	Above 40000	q3 monthly	PO	D3		100000		constant dose	No			Yes	Other	Yes	Yes	25OHD	Blood calcium, Urine calcium, Phosphate, Bone mass marker, ALKP, PTH	Low	Unclear	Unclear	Unclear	Yes	Yes	Unclear	< 50 nmol/l	33	45		21.5
Prevention of vitamin D deficiency in adolescents and pre-adolescents. An interventional multicenter study on the biological effect of repeated doses of 100,000 IU of vitamin D3	J. F. Duhamel, F. Zeghoud, M. Sempe, B. Boudailliez, M. Odievre, M. Laurans, M. Garabedian and E. Mallet	Archives de Pediatrie	French	2000	10701059	RCT/qRCT	Europe	4	68	35	Yes	Yes	Inpatient - hospital		2	Healthy/Subclinical VDD	Primary school age, Adolescents	10-15 years	Both female/male	placebo	none/placebo	q3 monthly	PO			0		Placebo	No			Yes	Other	Yes	Yes	25OHD	Blood calcium, Urine calcium, Phosphate, Bone mass marker, ALKP, PTH	Low	Unclear	Unclear	Unclear	Yes	Yes	Unclear	< 50 nmol/l	35	49		25.75
The role of the vitamin D receptor in regulating vitamin D metabolism: a study of vitamin D-dependent rickets, type II.	D. Tiosano, Y. Weisman and Z. Hochberg.	Journal of Clinical Endocrinology & Metabolism	English	2001	11344183	Single arm	Middle East	1	7	7	No comment on REB approval	Yes	Outpatient - hospital clinic		1	Healthy/Subclinical VDD	Primary school age, Adolescents	4-16 years	Both female/male	Intermittent	Above 40000	Single	PO	D3		86000	50000 IU/	Dose varies by age/weight/bsa	No			Yes	Other	Yes	Yes	25OHD	125(OH)2D, Blood calcium, Urine calcium, Phosphate, ALKP, PTH, Renal marker, GFR, 24,25(OH)2D, 24OHase%, 1OHase%	High	No	No	No	Yes	Yes	Unclear	< 50 nmol/l	7	40.2
The role of the vitamin D receptor in regulating vitamin D metabolism: a study of vitamin D-dependent rickets, type II.	D. Tiosano, Y. Weisman and Z. Hochberg.	Journal of Clinical Endocrinology & Metabolism	English	2001	11344183	Single arm	Middle East	1	7	7	No comment on REB approval	Yes	Outpatient - hospital clinic		1	Rickets	Primary school age, Adolescents	4-16 years	Both female/male	Intermittent	Above 40000	Single	PO	D3		86000	50000 IU/	Dose varies by age/weight/bsa	Yes	7.5 g/m2		Yes	Other	Yes	Yes	25OHD	125(OH)2D, Blood calcium, Urine calcium, Phosphate, ALKP, PTH, Renal marker, GFR, 24,25(OH)2D, 24OHase%, 1OHase%	High	No	No	No	Yes	Yes	Unclear	< 50 nmol/l	7	46.2
The role of the vitamin D receptor in regulating vitamin D metabolism: a study of vitamin D-dependent rickets, type II.	D. Tiosano, Y. Weisman and Z. Hochberg.	Journal of Clinical Endocrinology & Metabolism	English	2001	11344183	Single arm	Middle East	1	3	3	No comment on REB approval	Yes	Outpatient - hospital clinic		1	Rickets	Primary school age, Adolescents	4-16 years	Both female/male	Intermittent	Above 40000	Single	PO	D3		86000	50000 IU/	Dose varies by age/weight/bsa	Yes	7.5 g/m2		Yes	Other	Yes	Yes	25OHD	125(OH)2D, Blood calcium, Urine calcium, Phosphate, ALKP, PTH, Renal marker, GFR, 24,25(OH)2D, 24OHase%, 1OHase%	High	No	No	No	Yes	Yes	Unclear	< 50 nmol/l	3	40
Wintertime vitamin D deficiency in male adolescents: effect on parathyroid function and response to vitamin D3 supplements	J. Guillemant, H. T. Le, A. Maria, A. Allemandou, G. Peres and S. Guillemant	Osteoporosis International	English	2001	11716192	RCT/qRCT	Europe	1	58	28	Yes	Yes	School-based		2	Healthy/Subclinical VDD	Adolescents	13-17 years	Males only	None	none/placebo							No drug, control arm	No			Yes	Immunoassay	No	No	25OHD	PTH	Medium/Unclear	Unclear	Unclear	No	Yes	No	Yes	50 - 80 nmol/l	28	61		15.5
Wintertime vitamin D deficiency in male adolescents: effect on parathyroid function and response to vitamin D3 supplements	J. Guillemant, H. T. Le, A. Maria, A. Allemandou, G. Peres and S. Guillemant	Osteoporosis International	English	2001	11716192	RCT/qRCT	Europe	1	58	29	Yes	Yes	School-based		2	Healthy/Subclinical VDD	Adolescents	13-17 years	Males only	Intermittent	Above 40000	q2 monthly	PO	D3		100000		constant dose	No			Yes	Immunoassay	No	No	25OHD	PTH	Medium/Unclear	Unclear	Unclear	No	Yes	No	Yes	50 - 80 nmol/l	29	53.7		12.2
Comparisons of oral calcium, high dose vitamin D and a combination of these in the treatment of nutritional rickets in children	G. Kutluk, F. Cetinkaya and M. Basak	Journal of tropical pediatrics	English	2002	12521277	RCT/qRCT	Middle East	1	42	14	No comment on REB approval	No comment on consent process	Outpatient - hospital clinic		3	Rickets	Infants, Toddlers	not stated	Both female/male	placebo	none/placebo	Single	IM			0		Placebo	Yes	1 g, 3 times per week		No		Yes	No	Clinical Rickets	Blood calcium, Phosphate, Bone mass marker, ALKP	Medium/Unclear	Unclear	Unclear	Yes	Unclear	No	Yes	Not measured/reported
Comparisons of oral calcium, high dose vitamin D and a combination of these in the treatment of nutritional rickets in children	G. Kutluk, F. Cetinkaya and M. Basak	Journal of tropical pediatrics	English	2002	12521277	RCT/qRCT	Middle East	1	42	14	No comment on REB approval	No comment on consent process	Outpatient - hospital clinic		3	Rickets	Infants, Toddlers	not stated	Both female/male	Intermittent	Above 40000	Single	IM	Unclear		300000		constant dose	No			No		Yes	No	Clinical Rickets	Blood calcium, Phosphate, Bone mass marker, ALKP	Medium/Unclear	Unclear	Unclear	Yes	Unclear	No	Yes	Not measured/reported
Comparisons of oral calcium, high dose vitamin D and a combination of these in the treatment of nutritional rickets in children	G. Kutluk, F. Cetinkaya and M. Basak	Journal of tropical pediatrics	English	2002	12521277	RCT/qRCT	Middle East	1	42	14	No comment on REB approval	No comment on consent process	Outpatient - hospital clinic		3	Rickets	Infants, Toddlers	not stated	Both female/male	Intermittent	Above 40000	Single	IM	Unclear		300000		constant dose	Yes	1 g q8h		No		Yes	No	Clinical Rickets	Blood calcium, Phosphate, Bone mass marker, ALKP	Medium/Unclear	Unclear	Unclear	Yes	Unclear	No	Yes	Not measured/reported
The effect of conventional vitamin D2 supplementation on serum 25(OH)D concentration is weak among peripubertal Finnish girls: A 3-y prospective study.	M. Lehtonen-Veromaa, T. Mottonen, I. Nuotio, K. Irjala and J. Viikari.	European Journal of Clinical Nutrition	English	2002	12001014	Single arm	Europe	1	191	191	Yes	Yes	School-based		2	Healthy/Subclinical VDD	Primary school age, Adolescents	11-17 years	Females only	Daily	RDA/AI to999	Daily	PO	D2	52	800		constant dose	Yes	500 mg/day	Multivitamin (Optivit)	Yes	Immunoassay	No	No	25OHD	Blood calcium, Phosphate, Bone mass marker, ALKP, Osteocalcin	High	No	No	No	Yes	No	Yes	Not measured/reported
Comparison of low and high dose of vitamin D treatment in nutritional vitamin D deficiency rickets	Y. Cesur, H. Caksen, A. Gundem, E. Kirimi and D. Odabas	Journal of Pediatric Endocrinology & Metabolism	English	2003	14594170	RCT/qRCT	Middle East	1	56	20	No comment on REB approval	No comment on consent process	Inpatient - hospital		3	Rickets	Infants, Toddlers	3-36 months	Both female/male	Intermittent	Above 40000	Single	PO	Unclear		150000		constant dose	Yes	The patients admitted with hypocalcem		Yes	Immunoassay	Yes	Yes	Clinical Rickets	Blood calcium, Urine calcium, Phosphate, ALKP	Medium/Unclear	Unclear	Unclear	No	Yes	No	Unclear	< 50 nmol/l	20	15.25		5.25
Comparison of low and high dose of vitamin D treatment in nutritional vitamin D deficiency rickets	Y. Cesur, H. Caksen, A. Gundem, E. Kirimi and D. Odabas	Journal of Pediatric Endocrinology & Metabolism	English	2003	14594170	RCT/qRCT	Middle East	1	56	20	No comment on REB approval	No comment on consent process	Inpatient - hospital		3	Rickets	Infants, Toddlers	3-36 months	Both female/male	Intermittent	Above 40000	Single	PO	Unclear		300000		constant dose	Yes	The patients admitted with hypocalcem		Yes	Immunoassay	Yes	Yes	Clinical Rickets	Blood calcium, Urine calcium, Phosphate, ALKP	Medium/Unclear	Unclear	Unclear	No	Yes	No	Unclear	< 50 nmol/l	20	15.25		5.25
Comparison of low and high dose of vitamin D treatment in nutritional vitamin D deficiency rickets	Y. Cesur, H. Caksen, A. Gundem, E. Kirimi and D. Odabas	Journal of Pediatric Endocrinology & Metabolism	English	2003	14594170	RCT/qRCT	Middle East	1	56	16	No comment on REB approval	No comment on consent process	Inpatient - hospital		3	Rickets	Infants, Toddlers	3-36 months	Both female/male	Intermittent	Above 40000	Single	PO	Unclear		600000		constant dose	Yes	The patients admitted with hypocalcem		Yes	Immunoassay	Yes	Yes	Clinical Rickets	Blood calcium, Urine calcium, Phosphate, ALKP	Medium/Unclear	Unclear	Unclear	No	Yes	No	Unclear	< 50 nmol/l	16	15.25		5.25
Maternal vitamin D defiency and vitamin D supplementation in healthy infants.	I. Pehlivan, S. Hatun, M. Aydogan, K. Babaoglu and S. A. Gokalp.	Turkish Journal of Pediatrics	English	2003	14768796	RCT/qRCT	Middle East	2	40	19	Yes	No comment on consent process	Outpatient - hospital clinic		2	Healthy/Subclinical VDD	Neonate	7-7 days	Not specified	Daily	Under RDA/AI	Daily	PO	Unclear	14	400		constant dose	No			Yes	Immunoassay	Yes	No	25OHD	Blood calcium, Phosphate, Clinical Rickets, ALKP	High	Unclear	Unclear	Unclear	Unclear	No	Unclear	> 80 nmol/l		83.7		53.7
Maternal vitamin D defiency and vitamin D supplementation in healthy infants.	I. Pehlivan, S. Hatun, M. Aydogan, K. Babaoglu and S. A. Gokalp.	Turkish Journal of Pediatrics	English	2003	14768796	RCT/qRCT	Middle East	2	40	21	Yes	No comment on consent process	Outpatient - hospital clinic		2	Healthy/Subclinical VDD	Neonate	7-7 days	Not specified	Daily	RDA/AI to999	Daily	PO	Unclear	14	800		constant dose	No			Yes	Immunoassay	Yes	No	25OHD	Blood calcium, Phosphate, Clinical Rickets, ALKP	High	Unclear	Unclear	Unclear	Unclear	No	Unclear	> 80 nmol/l	21	83.7		53.7
Varying role of vitamin D deficiency in the etiology of rickets in young children vs. adolescents in northern India.	K. Balasubramanian, J. Rajeswari, Gulab, Y. C. Govil, A. K. Agarwal, A. Kumar and V. Bhatia.	Journal of Tropical Pediatrics	English	2003	12929879	Single arm	East Asia	1	34	34	Yes	Yes	Outpatient - hospital clinic		1	Other, Acute Illnesses	Neonate, Infants, Toddlers, Primary school age	0-120 month	Both female/male	None	none/placebo							No drug, control arm	No			Yes	Immunoassay	Yes	No	25OHD	125(OH)2D, Blood calcium, Phosphate, ALKP	High	No	No	No	Yes	Yes	Unclear	50 - 80 nmol/l	34	61.3		35.9
Varying role of vitamin D deficiency in the etiology of rickets in young children vs. adolescents in northern India.	K. Balasubramanian, J. Rajeswari, Gulab, Y. C. Govil, A. K. Agarwal, A. Kumar and V. Bhatia.	Journal of Tropical Pediatrics	English	2003	12929879	Single arm	East Asia	1	16	16	Yes	Yes	Outpatient - hospital clinic		1	Rickets	Primary school age, Adolescents	120-240 mon	Females only	Intermittent	Above 40000	Single	PO	Unclear		600000		constant dose	Yes	1 g		Yes	Immunoassay	Yes	No	25OHD	125(OH)2D, Blood calcium, Phosphate, ALKP	High	No	No	No	Yes	No	No	Not measured/reported
Varying role of vitamin D deficiency in the etiology of rickets in young children vs. adolescents in northern India.	K. Balasubramanian, J. Rajeswari, Gulab, Y. C. Govil, A. K. Agarwal, A. Kumar and V. Bhatia.	Journal of Tropical Pediatrics	English	2003	12929879	Single arm	East Asia	1	19	19	Yes	Yes	Outpatient - hospital clinic		1	Other, Exogenous obesity, or Euthyroid goiter	Primary school age, Adolescents	120-240 mon	Both female/male	None	none/placebo							No drug, control arm	No			Yes	Immunoassay	Yes	No	25OHD	125(OH)2D, Blood calcium, Phosphate, ALKP	High	No	No	No	Yes	Yes	Unclear	Not measured/reported
Varying role of vitamin D deficiency in the etiology of rickets in young children vs. adolescents in northern India.	K. Balasubramanian, J. Rajeswari, Gulab, Y. C. Govil, A. K. Agarwal, A. Kumar and V. Bhatia.	Journal of Tropical Pediatrics	English	2003	12929879	RCT/qRCT	East Asia	1	24	10	Yes	Yes	Outpatient - hospital clinic		2	Rickets	Neonate, Infants, Toddlers, Primary school age	0-120 month	Both female/male	placebo	none/placebo							Placebo	Yes	1 g		Yes	Immunoassay	Yes	No	25OHD	125(OH)2D, Blood calcium, Phosphate, ALKP	High	Unclear	Unclear	No	No	No	No	Not measured/reported
Varying role of vitamin D deficiency in the etiology of rickets in young children vs. adolescents in northern India.	K. Balasubramanian, J. Rajeswari, Gulab, Y. C. Govil, A. K. Agarwal, A. Kumar and V. Bhatia.	Journal of Tropical Pediatrics	English	2003	12929879	RCT/qRCT	East Asia	1	24		Yes	Yes	Outpatient - hospital clinic		2	Rickets	Neonate, Infants, Toddlers, Primary school age	0-120 month	Both female/male	Daily	4000-39999	Daily	PO	Unclear	13	6000		constant dose	Yes	1 g		Yes	Immunoassay	Yes	No	25OHD	125(OH)2D, Blood calcium, Phosphate, ALKP	High	Unclear	Unclear	No	No	No	No	Not measured/reported
Varying role of vitamin D deficiency in the etiology of rickets in young children vs. adolescents in northern India.	K. Balasubramanian, J. Rajeswari, Gulab, Y. C. Govil, A. K. Agarwal, A. Kumar and V. Bhatia.	Journal of Tropical Pediatrics	English	2003	12929879	RCT/qRCT	East Asia	1	24		Yes	Yes	Outpatient - hospital clinic		2	Rickets	Neonate, Infants, Toddlers, Primary school age	0-120 month	Both female/male	Intermittent	Above 40000	Single	PO	Unclear		600000		constant dose	Yes	1 g		Yes	Immunoassay	Yes	No	25OHD	125(OH)2D, Blood calcium, Phosphate, ALKP	High	Unclear	Unclear	No	No	No	No	Not measured/reported
Alendronate in the treatment of low bone mass in steroid-treated boys with Duchennes muscular dystrophy.	G. A. Hawker, R. Ridout, V. A. Harris, C. C. Chase, L. J. Fielding and W. D. Biggar.	Archives of Physical Medicine & Rehabilitation	English	2005	15706555	Single arm	North America	1	16	16	Yes	Yes	Outpatient - hospital clinic		1	Other, Cerebral palsy/Neuromuscular disorder	Primary school age, Adolescents	not stated	Males only	Daily	1000-3999	Daily	PO	Unclear	104	1000		constant dose	Yes	750 mg/day	Alendronate	No		Yes	No	Bone mass marker	Adverse effects	High	No	No	No	Yes	No	Yes	Not measured/reported
Benefits of pamidronate in children with osteogenesis imperfecta: An open prospective study.	V. Forin, A. Arabi, V. Guigonis, G. Filipe, A. Bensman and C. Roux.	Joint Bone Spine	English	2005	16038843	Single arm	Europe	1	29	29	No comment on REB approval	No comment on consent process	Outpatient - hospital clinic		1	Other, Osteogenesis imperfecta	Infants, Toddlers, Primary school age, Adolescents	not stated	Both female/male	Daily	1000-3999	Daily	PO	Unclear	69.3	1200		constant dose	Yes	250 mg (weight <15 kg), 500 mg (weigh	Pamidronate	Yes	LC/MS	Yes	Yes	Bone mass marker	25OHD, Blood calcium, Urine calcium, Phosphate, ALKP, PTH, urine N-telopeptide collagen cross link(NTX), Pain, Fractures, Creatinine	High	No	No	No	Yes	No	Unclear	< 50 nmol/l	29
Oral vitamin A, E and D supplementation of pre-term newborns either breast-fed or formula-fed: a 3-month longitudinal study.	E. E. Delvin, B. L. Salle, O. Claris, G. Putet, J.-M. Hascoet, L. Desnoulez, S. Messai and E. Levy	Journal of Pediatric Gastroenterology and Nutrition	English	2005	15625425	Controlled non-randomized	Europe	3	96	23	Yes	Yes	Inpatient - hospital		2	Premature and/or low birth weight	Neonate	not stated	Not specified	Daily	1000-3999	Daily	PO	Unclear	12.9	1000		constant dose	No		Uvesterol ADEC (Vitamins)	Yes	Immunoassay	No	No	25OHD, Vitamin A, Vitamin E		Medium/Unclear	No	No	No	Yes	Yes	Yes	< 50 nmol/l	19	34.4		25.6
Oral vitamin A, E and D supplementation of pre-term newborns either breast-fed or formula-fed: a 3-month longitudinal study.	E. E. Delvin, B. L. Salle, O. Claris, G. Putet, J.-M. Hascoet, L. Desnoulez, S. Messai and E. Levy	Journal of Pediatric Gastroenterology and Nutrition	English	2005	15625425	Controlled non-randomized	Europe	3	96	62	Yes	Yes	Inpatient - hospital		2	Premature and/or low birth weight	Neonate	not stated	Not specified	Daily	1000-3999	Daily	PO	Unclear	12.9	1000		constant dose	No		Prenatal Formula, Uvesterol ADEC:(A 3000 IU, vitamin E 5 IU, vitamin C 50mg)	Yes	Immunoassay	No	No	25OHD, Vitamin A, Vitamin E		Medium/Unclear	No	No	No	Yes	Yes	Yes	< 50 nmol/l	47	47.5		26.7
A randomized clinical trial of prophylactic effects of vitamin D on different indices of osteopenia of prematurity.	P. Alizade, F. Naderi and K. Sotoudeh.	Iranian Journal of Public Health	English	2006	N/A	RCT/qRCT	Middle East	1	96	32	Yes	Yes	Other	Inpatient and Outpatient	2	Premature and/or low birth weight	Neonate	0-14 days	Both female/male	Daily	RDA/AI to999	Daily	PO	Unclear	6.7	400		constant dose	Yes		Infants who could tolerate breast milk, received calcium supplement as calcium gluconate (90-120 mg/kg/d) and phosphate supplement as phosphate sandose, effervescent tablet (55-75 mg/kg/d). For infants deprived human milk, premature formula (Prenon), enriched in calcium and phosphate, was calculated and prescribed.	No		Yes	No	Clinical Rickets	Blood calcium, Phosphate, Bone mass marker, ALKP	Medium/Unclear	Yes	Yes	No	Yes	No	Unclear	Not measured/reported
A randomized clinical trial of prophylactic effects of vitamin D on different indices of osteopenia of prematurity.	P. Alizade, F. Naderi and K. Sotoudeh.	Iranian Journal of Public Health	English	2006	N/A	RCT/qRCT	Middle East	1	96	36	Yes	Yes	Other	Inpatient and Outpatient	2	Premature and/or low birth weight	Neonate	0-14 days	Both female/male	Daily	1000-3999	Daily	PO	Unclear	6.8	1000		constant dose	Yes		Infants who could tolerate breast milk, received calcium supplement as calcium gluconate (90-120 mg/kg/d) and phosphate supplement as phosphate sandose, effervescent tablet (55-75 mg/kg/d). For infants deprived human milk, premature formula (Prenon), enriched in calcium and phosphate, was calculated and prescribed.	No		Yes	No	Clinical Rickets	Blood calcium, Phosphate, Bone mass marker, ALKP	Medium/Unclear	Yes	Yes	No	Yes	No	Unclear	Not measured/reported
Bone mineral density in response to two different regimes in rickets	M. Akcam, M. Yildiz, A. Yilmaz and R. Artan	Indian Pediatrics	English	2006	16735766	RCT/qRCT	Middle East	1	20	10	Yes	Yes	Outpatient - hospital clinic		2	Rickets	Infants, Toddlers	5-13 months	Both female/male	Intermittent	Above 40000	Single	PO	D3		600000		constant dose	No			Yes	Not stated	Yes	No	Bone mass marker	25OHD, Blood calcium, Phosphate, Clinical Rickets, ALKP	High	No	No	No	Unclear	Unclear	Yes	< 50 nmol/l	10	15		6
Bone mineral density in response to two different regimes in rickets	M. Akcam, M. Yildiz, A. Yilmaz and R. Artan	Indian Pediatrics	English	2006	16735766	RCT/qRCT	Middle East	1	20	10	Yes	Yes	Outpatient - hospital clinic		2	Rickets	Infants, Toddlers	5-13 months	Both female/male	Daily	4000-39999	Daily	PO	D3	4.2	20000		constant dose	No			Yes	Not stated	Yes	No	Bone mass marker	25OHD, Blood calcium, Phosphate, Clinical Rickets, ALKP	High	No	No	No	Unclear	Unclear	Yes	< 50 nmol/l	10	14.25		4.5
Early response to vitamin D2 in children with calcium deficiency rickets	T. D. Thacher, P. R. Fischer, C. O. Isichei and J. M. Pettifor	The Journal of Pediatrics	English	2006	17137904	Single arm	Africa	1	16	16	Yes	Yes	Outpatient - hospital clinic		1	Rickets	Toddlers	not stated	Both female/male	Intermittent	Above 40000	Single	PO	D2		50000		constant dose	No			Yes	Immunoassay	Yes	No	125(OH)2D	25OHD, Blood calcium, Phosphate, ALKP, PTH	High	No	No	No	Unclear	No	Yes	< 50 nmol/l	16	28.5		6
Effect of vitamin D replacement on musculoskeletal parameters in school children: A randomized controlled trial	F. G. El-Hajj, M. Nabulsi, H. Tamim, J. Maalouf, M. Salamoun, H. Khalife, M. Choucair, A. Arabi, R. Vieth and G. E. H. Fuleihan	The Journal of Clinical Endocrinology and Metabolis	English	2006	16278262	RCT/qRCT	Middle East	1	179	58	Yes	Yes	School-based		3	Healthy/Subclinical VDD	Primary school age, Adolescents	10-17 years	Females only	placebo	none/placebo	Weekly	PO		52	0		Placebo	No			Yes	Immunoassay	Yes	No	Bone mass marker	25OHD , 125(OH)2D, Blood calcium, Clinical Rickets, Anthropometric measures, Sick days	Medium/Unclear	Yes	Yes	Yes	Yes	No	Unclear	< 50 nmol/l	55	35		17.5
Effect of vitamin D replacement on musculoskeletal parameters in school children: A randomized controlled trial	F. G. El-Hajj, M. Nabulsi, H. Tamim, J. Maalouf, M. Salamoun, H. Khalife, M. Choucair, A. Arabi, R. Vieth and G. E. H. Fuleihan	The Journal of Clinical Endocrinology and Metabolis	English	2006	16278262	RCT/qRCT	Middle East	1	179	62	Yes	Yes	School-based		3	Healthy/Subclinical VDD	Primary school age, Adolescents	10-17 years	Females only	Weekly	1000-3999	Weekly	PO	D3	52	1400		constant dose	No			Yes	Immunoassay	Yes	No	Bone mass marker	25OHD , 125(OH)2D, Blood calcium, Clinical Rickets, Anthropometric measures, Sick days	Medium/Unclear	Yes	Yes	Yes	Yes	No	Unclear	< 50 nmol/l	58	35		22.5
Effect of vitamin D replacement on musculoskeletal parameters in school children: A randomized controlled trial	F. G. El-Hajj, M. Nabulsi, H. Tamim, J. Maalouf, M. Salamoun, H. Khalife, M. Choucair, A. Arabi, R. Vieth and G. E. H. Fuleihan	The Journal of Clinical Endocrinology and Metabolis	English	2006	16278262	RCT/qRCT	Middle East	1	179	59	Yes	Yes	School-based		3	Healthy/Subclinical VDD	Primary school age, Adolescents	10-17 years	Females only	Weekly	4000-39999	Weekly	PO	D3	52	14000		constant dose	No			Yes	Immunoassay	Yes	No	Bone mass marker	25OHD , 125(OH)2D, Blood calcium, Clinical Rickets, Anthropometric measures, Sick days	Medium/Unclear	Yes	Yes	Yes	Yes	No	Unclear	< 50 nmol/l	55	35		20
Fat-soluble vitamins in breast-fed preterm and term infants.	C. Henriksen, I. B. Helland, A. Ronnestad, M. Gronn, P. O. Iversen and C. A. Drevon.	European Journal of Clinical Nutrition	English	2006	16452918	Single arm	Europe	3	43	43	Yes	Yes	Inpatient - hospital		1	Premature and/or low birth weight	Neonate	0-1 days	Both female/male	Daily	RDA/AI to999	Daily	PO	D3	8	500		constant dose	No		Supplements, Vitamins AEK	Yes	LC/MS	No	No	25OHD		High	No	No	No	Unclear	Yes	Yes	Not measured/reported
Feasibility of a type 1 diabetes primary prevention trial using 2000 IU vitamin D3 in infants from the general population with increased HLA-associated risk.	B. A. Wicklow and S. P. Taback.	Annals of the New York Academy of Sciences	English	2006	17130571	RCT/qRCT	North America	1	7	4	No comment on REB approval	Yes	Outpatient - hospital clinic		2	Healthy/Subclinical VDD	Neonate	0-1 months	Not specified	Daily	1000-3999	Daily	PO	D3	52	2000		constant dose	No			Yes	Not stated	Yes	Yes	Diabetes marker, Type 1 Diabetes incidence	25OHD , 125(OH)2D, Blood calcium, Urine calcium, Phosphate, Bone mass marker, Phosphorus, Urine phosphate, Renal ultrasound	High	Unclear	Unclear	No	Unclear	Unclear	Yes	Not measured/reported
Feasibility of a type 1 diabetes primary prevention trial using 2000 IU vitamin D3 in infants from the general population with increased HLA-associated risk.	B. A. Wicklow and S. P. Taback.	Annals of the New York Academy of Sciences	English	2006	17130571	RCT/qRCT	North America	1	7	3	No comment on REB approval	Yes	Outpatient - hospital clinic		2	Healthy/Subclinical VDD	Neonate	0-1 months	Not specified	Daily	Under RDA/AI	Daily	PO	D3	52	400		constant dose	No			Yes	Not stated	Yes	Yes	Diabetes marker, Type 1 Diabetes incidence	25OHD , 125(OH)2D, Blood calcium, Urine calcium, Phosphate, Bone mass marker, Phosphorus, Urine phosphate, Renal ultrasound	High	Unclear	Unclear	No	Unclear	Unclear	Yes	Not measured/reported
Impact of dietary and lifestyle on vitamin D in healthy student girls aged 11-15 years	H. Dahifar, A. Faraji, A. Ghorbani and S. Yassobi	The Journal of Medical Investigation	English	2006	16953055	RCT/qRCT	Middle East	1	15	8	Yes	Yes	School-based		2	Healthy/Subclinical VDD	Primary school age, Adolescents	11-15 years	Females only	None	none/placebo							No drug, control arm	No			Yes	Immunoassay	Yes	No	25OHD	Blood calcium, Phosphate, ALKP, PTH	Medium/Unclear	Unclear	Unclear	No	Yes	Yes	Unclear	< 50 nmol/l	8	17.5		5
Impact of dietary and lifestyle on vitamin D in healthy student girls aged 11-15 years	H. Dahifar, A. Faraji, A. Ghorbani and S. Yassobi	The Journal of Medical Investigation	English	2006	16953055	RCT/qRCT	Middle East	1	15	7	Yes	Yes	School-based		2	Healthy/Subclinical VDD	Primary school age, Adolescents	11-15 years	Females only	Daily	Above 40000	Daily	PO	Unclear	3	50000		constant dose	No			Yes	Immunoassay	Yes	No	25OHD	Blood calcium, Phosphate, ALKP, PTH	Medium/Unclear	Unclear	Unclear	No	Yes	Yes	Unclear	< 50 nmol/l	7	18.75		5
Two randomized vitamin D trials in ambulatory patients on anticonvulsants: impact on bone	M. A. Mikati, L. Dib, B. Yamout, R. Sawaya, A. C. Rahi and G. Fuleihan	Neurology	English	2006	17159108	RCT/qRCT	Middle East	1	94	46	Yes	Yes	Outpatient - hospital clinic		2	Epilepsy/Seizure	Primary school age, Adolescents	10-18 years	Both female/male	Daily	1000-3999	Daily	PO	D2	52	2000		constant dose	No			Yes	Immunoassay	No	No	Bone mass marker	25OHD	Medium/Unclear	No	No	No	Yes	Yes	Yes	< 50 nmol/l	38	45		22.75
Two randomized vitamin D trials in ambulatory patients on anticonvulsants: impact on bone	M. A. Mikati, L. Dib, B. Yamout, R. Sawaya, A. C. Rahi and G. Fuleihan	Neurology	English	2006	17159108	RCT/qRCT	Middle East	1	94	48	Yes	Yes	Outpatient - hospital clinic		2	Epilepsy/Seizure	Primary school age, Adolescents	10-18 years	Both female/male	Daily	Under RDA/AI	Daily	PO	D2	52	400		constant dose	No			Yes	Immunoassay	No	No	Bone mass marker	25OHD	Medium/Unclear	No	No	No	Yes	Yes	Yes	< 50 nmol/l	40	45.5		17.75
Asymptomatic rickets in adolescent girls	H. Dahifar, A. Faraji, S. Yassobi and A. Ghorbani	The Indian Journal of Pediatrics	English	2007	17595501	RCT/qRCT	Middle East	1	15	8	Yes	Yes	School-based		2	Healthy/Subclinical VDD	Primary school age, Adolescents	11-15 years	Females only	None	none/placebo							No drug, control arm	No			Yes	Immunoassay	Yes	No	25OHD	Blood calcium, Phosphate, ALKP, PTH	Medium/Unclear	Unclear	Unclear	No	Yes	Yes	Unclear	< 50 nmol/l	8	17.75		4.75
Asymptomatic rickets in adolescent girls	H. Dahifar, A. Faraji, S. Yassobi and A. Ghorbani	The Indian Journal of Pediatrics	English	2007	17595501	RCT/qRCT	Middle East	1	15	7	Yes	Yes	School-based		2	Healthy/Subclinical VDD	Primary school age, Adolescents	11-15 years	Females only	Daily	Above 40000	Daily	PO	Unclear	3	50000		constant dose	No			Yes	Immunoassay	Yes	No	25OHD	Blood calcium, Phosphate, ALKP, PTH	Medium/Unclear	Unclear	Unclear	No	Yes	Yes	Unclear	< 50 nmol/l	7	18.5		4.5
High-dose vitamin D supplementation in children with cerebral palsy or neuromuscular disorder	P. Kilpinen-Loisa, H. Nenonen, H. Pihko and O. Makitie	Neuropediatrics	English	2007	18058622	RCT/qRCT	Europe	1	45	23	Yes	Yes	School-based		2	Other, Cerebral palsy/Neuromuscular disorder	Primary school age, Adolescents	9-18 years	Both female/male	None	none/placebo							No drug, control arm	No			Yes	LC/MS	Yes	No	25OHD	Blood calcium, Phosphate, ALKP, PTH	High	No	No	No	Yes	Yes	Yes	< 50 nmol/l	23		4
High-dose vitamin D supplementation in children with cerebral palsy or neuromuscular disorder	P. Kilpinen-Loisa, H. Nenonen, H. Pihko and O. Makitie	Neuropediatrics	English	2007	18058622	RCT/qRCT	Europe	1	45	22	Yes	Yes	School-based		2	Other, Cerebral palsy/Neuromuscular disorder	Primary school age, Adolescents	9-18 years	Both female/male	Daily	1000-3999	Daily	PO	D3	10	1000		constant dose	No			Yes	LC/MS	Yes	No	25OHD	Blood calcium, Phosphate, ALKP, PTH	High	No	No	No	Yes	Yes	Yes	< 50 nmol/l	21		4
Twice single doses of 100,000 IU of vitamin D in winter is adequate and safe for prevention of vitamin D deficiency in healthy children from Ushuaia, Tierra Del Fuego, Argentina	C. Tau, V. Ciriani, E. Scaiola and M. AcuâˆšÂ±a	The Journal of steroid biochemistry and molecular b	English	2007	17257830	Single arm	Central & South America	1	18	18	No comment on REB approval	Yes			1	Healthy/Subclinical VDD	Neonate	not stated	Both female/male	Intermittent	Above 40000	q3 monthly	PO	D2		100000		constant dose	No			Yes	Immunoassay	Yes	No	25OHD	Blood calcium, Phosphate, ALKP, Anthropometric measures	High	No	No	No	Unclear	Yes	Unclear	50 - 80 nmol/l	18	73.25		14.75
Calcium homeostasis in 40 adolescents with beta-thalassemia major: a case-control study of the effects of intramuscular injection of a megadose of cholecalciferol	A. Soliman, A. Adel, M. Wagdy, A. M. Al and N. ElMulla	Pediatric Endocrinology Reviews	English	2008	19337170	Single arm	Middle East	1	40	40	Yes	Yes	Outpatient - hospital clinic		1	Other, beta-Thalassemia	Primary school age, Adolescents	12-19 years	Both female/male	Intermittent	Above 40000	Single	IM	D3		600000	10,000 U/	Dose varies by age/weight/bsa	No			Yes	Immunoassay	Yes	No	25OHD	Blood calcium, Phosphate, Clinical Rickets, Bone mass marker, ALKP, PTH, Ferritin, IGF-1	High	No	No	No	Unclear	No	Unclear	< 50 nmol/l	38	20		11.25
Calcium homeostasis in 40 adolescents with beta-thalassemia major: a case-control study of the effects of intramuscular injection of a megadose of cholecalciferol	A. Soliman, A. Adel, M. Wagdy, A. M. Al and N. ElMulla	Pediatric Endocrinology Reviews	English	2008	19337170	Single arm	Middle East	1	26	26	Yes	Yes	Outpatient - hospital clinic		1	Healthy/Subclinical VDD	Primary school age, Adolescents	12-19 years	Both female/male	Intermittent	Above 40000	Single	IM	D3		600000	10000 U/K	Dose varies by age/weight/bsa	No			Yes	Immunoassay	Yes	No	25OHD	Blood calcium, Phosphate, ALKP, PTH, Ferritin, IGF-1	High	No	No	No	Unclear	No	Unclear	< 50 nmol/l	26	16.75		11.25
Effect of different doses of vitamin D on osteocalcin and deoxypyridinoline in preterm infants.	F. M. Kislal and U. Dilmen.	Pediatrics International	English	2008	18353060	RCT/qRCT	Europe	1	48	11	Yes	Yes	Inpatient - hospital		3	Premature and/or low birth weight	Neonate	0-1 months	Both female/male	Daily	RDA/AI to999	Daily	PO	Unclear	2.14	244	200 IU/kg	Dose varies by age/weight/bsa	No			No		Yes	No	Bone mass marker, Urinary DPD excretion	Blood calcium, Phosphate, ALKP, Osteocalcin	Medium/Unclear	Unclear	Unclear	Unclear	No	No	Unclear	Not measured/reported
Effect of different doses of vitamin D on osteocalcin and deoxypyridinoline in preterm infants.	F. M. Kislal and U. Dilmen.	Pediatrics International	English	2008	18353060	RCT/qRCT	Europe	1	48	15	Yes	Yes	Inpatient - hospital		3	Premature and/or low birth weight	Neonate	0-1 months	Both female/male	Daily	RDA/AI to999	Daily	PO	Unclear	2.14	460	400 IU/kg	Dose varies by age/weight/bsa	No			No		Yes	No	Bone mass marker, Urinary DPD excretion	Blood calcium, Phosphate, ALKP, Osteocalcin	Medium/Unclear	Unclear	Unclear	Unclear	No	No	Unclear	Not measured/reported
Effect of different doses of vitamin D on osteocalcin and deoxypyridinoline in preterm infants.	F. M. Kislal and U. Dilmen.	Pediatrics International	English	2008	18353060	RCT/qRCT	Europe	1	48	11	Yes	Yes	Inpatient - hospital		3	Premature and/or low birth weight	Neonate	0-1 months	Both female/male	Daily	RDA/AI to999	Daily	PO	Unclear	2.14	888	800 IU/kg	Dose varies by age/weight/bsa	No			No		Yes	No	Bone mass marker, Urinary DPD excretion	Blood calcium, Phosphate, ALKP, Osteocalcin	Medium/Unclear	Unclear	Unclear	Unclear	No	No	Unclear	Not measured/reported
Effect of vitamin D supplementation on bone and vitamin D status among Pakistani immigrants in Denmark: a randomised double-blinded placebo-controlled intervention study.	R. Andersen, C. Molgaard, L. T. Skovgaard, C. Brot, K. D. Cashman, J. Jakobsen, C. Lamberg-Allardt and L. Ovesen	British Journal of Nutrition	English	2008	18208636	RCT/qRCT	Europe	1	26	8	Yes	Yes	Other	Community	3	Healthy/Subclinical VDD	Primary school age, Adolescents	10-15 years	Females only	placebo	none/placebo	Daily	PO		52	0		Placebo	No			Yes	LC/MS	Yes	Yes	25OHD	Blood calcium, Urine calcium, Bone mass marker, PTH, Osteocalcin, Urinary Pyridinoline/deoxypyridinoline	Low	Yes	Yes	Yes	Yes	No	Yes	< 50 nmol/l	8		7
Effect of vitamin D supplementation on bone and vitamin D status among Pakistani immigrants in Denmark: a randomised double-blinded placebo-controlled intervention study.	R. Andersen, C. Molgaard, L. T. Skovgaard, C. Brot, K. D. Cashman, J. Jakobsen, C. Lamberg-Allardt and L. Ovesen	British Journal of Nutrition	English	2008	18208636	RCT/qRCT	Europe	1	26	9	Yes	Yes	Other	Community	3	Healthy/Subclinical VDD	Primary school age, Adolescents	10-15 years	Females only	Daily	Under RDA/AI	Daily	PO	D3	52	400		constant dose	No			Yes	LC/MS	Yes	Yes	25OHD	Blood calcium, Urine calcium, Bone mass marker, PTH, Osteocalcin, Urinary Pyridinoline/deoxypyridinoline	Low	Yes	Yes	Yes	Yes	No	Yes	< 50 nmol/l	9		1
Effect of vitamin D supplementation on bone and vitamin D status among Pakistani immigrants in Denmark: a randomised double-blinded placebo-controlled intervention study.	R. Andersen, C. Molgaard, L. T. Skovgaard, C. Brot, K. D. Cashman, J. Jakobsen, C. Lamberg-Allardt and L. Ovesen	British Journal of Nutrition	English	2008	18208636	RCT/qRCT	Europe	1	26	9	Yes	Yes	Other	Community	3	Healthy/Subclinical VDD	Primary school age, Adolescents	10-15 years	Females only	Daily	RDA/AI to999	Daily	PO	D3	52	800		constant dose	No			Yes	LC/MS	Yes	Yes	25OHD	Blood calcium, Urine calcium, Bone mass marker, PTH, Osteocalcin, Urinary Pyridinoline/deoxypyridinoline	Low	Yes	Yes	Yes	Yes	No	Yes	< 50 nmol/l	9		8
Linear growth in relation to the circulating concentrations of insulin-like growth factor I, parathyroid hormone, and 25-hydroxy vitamin D in children with nutritional rickets before and after treatm	A. T. Soliman, K. F. Al, N. Alhemaidi, A. M. Al, Z. M. Al and K. Yakoot	Metabolism	English	2008	18078865	Single arm	Middle East	1	46	46	Yes	Yes	Outpatient - hospital clinic		1	Rickets	Neonate, Infants, Toddlers	0-3.99 year	Both female/male	Intermittent	Above 40000	Single	IM	D3		300000		constant dose	No			Yes	Immunoassay	Yes	No	25OHD	Blood calcium, Clinical Rickets, PTH	High	No	No	No	Unclear	Unclear	Unclear	< 50 nmol/l	46	11.25		1.5
Percent true calcium absorption, mineral metabolism, and bone mass in children with arthritis: effect of supplementation with vitamin D3 and calcium	L. S. Hillman, J. T. Cassidy, F. Chanetsa, J. E. Hewett, B. J. Higgins and J. D. Robertson	Arthritis Rheumatism	English	2008	18821668	RCT/qRCT	North America	1	24	15	Yes	Yes			4	Other, Juvenile arthritis	Toddlers, Primary school age, Adolescents	3-15 years	Both female/male	Daily	Under RDA/AI	Daily	PO	D3	26	400		constant dose	No			Yes	Immunoassay	Yes	Yes	Calcium absorption	25OHD , 125(OH)2D, Blood calcium, Urine calcium, Phosphate, Bone mass marker, Serum osteocalcin, Magnesium	Medium/Unclear	Unclear	Yes	Yes	Unclear	No	Yes	50 - 80 nmol/l	16	55.775		15.3
Percent true calcium absorption, mineral metabolism, and bone mass in children with arthritis: effect of supplementation with vitamin D3 and calcium	L. S. Hillman, J. T. Cassidy, F. Chanetsa, J. E. Hewett, B. J. Higgins and J. D. Robertson	Arthritis Rheumatism	English	2008	18821668	RCT/qRCT	North America	1	24	14	Yes	Yes			4	Other, Juvenile arthritis	Toddlers, Primary school age, Adolescents	3-15 years	Both female/male	Daily	Under RDA/AI	Daily	PO	D3	26	400		constant dose	Yes	1 g/day		Yes	Immunoassay	Yes	Yes	Calcium absorption	25OHD , 125(OH)2D, Blood calcium, Urine calcium, Phosphate, Bone mass marker, Serum osteocalcin, Magnesium	Medium/Unclear	Unclear	Yes	Yes	Unclear	No	Yes	50 - 80 nmol/l	16	55.775		15.3
Percent true calcium absorption, mineral metabolism, and bone mass in children with arthritis: effect of supplementation with vitamin D3 and calcium	L. S. Hillman, J. T. Cassidy, F. Chanetsa, J. E. Hewett, B. J. Higgins and J. D. Robertson	Arthritis Rheumatism	English	2008	18821668	RCT/qRCT	North America	1	24	16	Yes	Yes			4	Other, Juvenile arthritis	Toddlers, Primary school age, Adolescents	3-15 years	Both female/male	Daily	1000-3999	Daily	PO	D3	26	2000		constant dose	No			Yes	Immunoassay	Yes	Yes	Calcium absorption	25OHD , 125(OH)2D, Blood calcium, Urine calcium, Phosphate, Bone mass marker, Serum osteocalcin, Magnesium	Medium/Unclear	Unclear	Yes	Yes	Unclear	No	Yes	50 - 80 nmol/l	16	55.775		15.3
Percent true calcium absorption, mineral metabolism, and bone mass in children with arthritis: effect of supplementation with vitamin D3 and calcium	L. S. Hillman, J. T. Cassidy, F. Chanetsa, J. E. Hewett, B. J. Higgins and J. D. Robertson	Arthritis Rheumatism	English	2008	18821668	RCT/qRCT	North America	1	24	16	Yes	Yes			4	Other, Juvenile arthritis	Toddlers, Primary school age, Adolescents	3-15 years	Both female/male	Daily	1000-3999	Daily	PO	D3	26	2000		constant dose	Yes	1 g/day		Yes	Immunoassay	Yes	Yes	Calcium absorption	25OHD , 125(OH)2D, Blood calcium, Urine calcium, Phosphate, Bone mass marker, Serum osteocalcin, Magnesium	Medium/Unclear	Unclear	Yes	Yes	Unclear	No	Yes	50 - 80 nmol/l	16	55.775		15.3
Percent true calcium absorption, mineral metabolism, and bone mineralization in children with cystic fibrosis: effect of supplementation with vitamin D and calcium	L. S. Hillman, J. T. Cassidy, M. F. Popescu, J. E. Hewett, J. Kyger and J. D. Robertson	Pediatric Pulmonology	English	2008	18615666	RCT/qRCT	North America	1	11	9	Yes	Yes	Outpatient - hospital clinic		4	Cystic fibrosis	Toddlers, Primary school age, Adolescents	3-15 years	Both female/male	Daily	Under RDA/AI	Daily	PO	D3	26	400		constant dose	No			Yes	Immunoassay	Yes	Yes	Calcium absorption	25OHD , 125(OH)2D, Blood calcium, Urine calcium, Phosphate, Bone mass marker, PTH, Magnesium	Medium/Unclear	Unclear	Yes	Yes	Unclear	Yes	Yes	> 80 nmol/l	15	88.5		33
Percent true calcium absorption, mineral metabolism, and bone mineralization in children with cystic fibrosis: effect of supplementation with vitamin D and calcium	L. S. Hillman, J. T. Cassidy, M. F. Popescu, J. E. Hewett, J. Kyger and J. D. Robertson	Pediatric Pulmonology	English	2008	18615666	RCT/qRCT	North America	1	11	10	Yes	Yes	Outpatient - hospital clinic		4	Cystic fibrosis	Toddlers, Primary school age, Adolescents	3-15 years	Both female/male	Daily	Under RDA/AI	Daily	PO	D3	26	400		constant dose	Yes	1 g/day		Yes	Immunoassay	Yes	Yes	Calcium absorption	25OHD , 125(OH)2D, Blood calcium, Urine calcium, Phosphate, Bone mass marker, PTH, Magnesium	Medium/Unclear	Unclear	Yes	Yes	Unclear	Yes	Yes	> 80 nmol/l	15	88.5		33
Percent true calcium absorption, mineral metabolism, and bone mineralization in children with cystic fibrosis: effect of supplementation with vitamin D and calcium	L. S. Hillman, J. T. Cassidy, M. F. Popescu, J. E. Hewett, J. Kyger and J. D. Robertson	Pediatric Pulmonology	English	2008	18615666	RCT/qRCT	North America	1	11	12	Yes	Yes	Outpatient - hospital clinic		4	Cystic fibrosis	Toddlers, Primary school age, Adolescents	3-15 years	Both female/male	Daily	1000-3999	Daily	PO	D3	26	2000		constant dose	No			Yes	Immunoassay	Yes	Yes	Calcium absorption	25OHD , 125(OH)2D, Blood calcium, Urine calcium, Phosphate, Bone mass marker, PTH, Magnesium	Medium/Unclear	Unclear	Yes	Yes	Unclear	Yes	Yes	> 80 nmol/l	15	88.5		33
Percent true calcium absorption, mineral metabolism, and bone mineralization in children with cystic fibrosis: effect of supplementation with vitamin D and calcium	L. S. Hillman, J. T. Cassidy, M. F. Popescu, J. E. Hewett, J. Kyger and J. D. Robertson	Pediatric Pulmonology	English	2008	18615666	RCT/qRCT	North America	1	11	11	Yes	Yes	Outpatient - hospital clinic		4	Cystic fibrosis	Toddlers, Primary school age, Adolescents	3-15 years	Both female/male	Daily	1000-3999	Daily	PO	D3	26	2000		constant dose	Yes	1 g/day		Yes	Immunoassay	Yes	Yes	Calcium absorption	25OHD , 125(OH)2D, Blood calcium, Urine calcium, Phosphate, Bone mass marker, PTH, Magnesium	Medium/Unclear	Unclear	Yes	Yes	Unclear	Yes	Yes	> 80 nmol/l	15	88.5		33
Randomized controlled trial of vitamin D supplementation for winter-related atopic dermatitis in Boston: a pilot study.	R. Sidbury, A. F. Sullivan, R. I. Thadhani and C. A. Camargo Jr.	British Journal of Dermatology	English	2008	18489598	RCT/qRCT	North America	1	11	5	Yes	No comment on consent process	Outpatient - hospital clinic		2	Other, Atopic dermatitis	Toddlers, Primary school age	not stated	Both female/male	Daily	1000-3999	Daily	PO	D2	4.3	1000		constant dose	No			No		No	No	Clinical atopic dermatitis		Medium/Unclear	Yes	Yes	Yes	Yes	Yes	Yes	Not measured/reported
Randomized controlled trial of vitamin D supplementation for winter-related atopic dermatitis in Boston: a pilot study.	R. Sidbury, A. F. Sullivan, R. I. Thadhani and C. A. Camargo Jr.	British Journal of Dermatology	English	2008	18489598	RCT/qRCT	North America	1	11	6	Yes	No comment on consent process	Outpatient - hospital clinic		2	Other, Atopic dermatitis	Toddlers, Primary school age	not stated	Both female/male	placebo	none/placebo	Daily	PO		4.3			Placebo	No			No		No	No	Clinical atopic dermatitis		Medium/Unclear	Yes	Yes	Yes	Yes	Yes	Yes	Not measured/reported
Short- and long-term safety of weekly high-dose vitamin D3 supplementation in school children	J. Maalouf, M. Nabulsi, R. Vieth, S. Kimball, R. El-Rassi, Z. Mahfoud and F. G. El-Hajj	The Journal of Clinical Endocrinology and Metabolis	English	2008	18445674	RCT/qRCT	Middle East	1	25	9	Yes	Yes	School-based		2	Healthy/Subclinical VDD	Primary school age, Adolescents	10-17 years	Both female/male	placebo	none/placebo	Weekly	PO		8	0		Placebo	No			Yes	Immunoassay	Yes	No	25OHD , 125(OH)2D, Blood calcium	25OHD , 125(OH)2D, Blood calcium, Adverse effects	Medium/Unclear	Unclear	Unclear	No	Yes	Yes	Unclear	> 80 nmol/l	9		8
Short- and long-term safety of weekly high-dose vitamin D3 supplementation in school children	J. Maalouf, M. Nabulsi, R. Vieth, S. Kimball, R. El-Rassi, Z. Mahfoud and F. G. El-Hajj	The Journal of Clinical Endocrinology and Metabolis	English	2008	18445674	RCT/qRCT	Middle East	1	340	111	Yes	Yes	School-based		3	Healthy/Subclinical VDD	Primary school age, Adolescents	10-17 years	Both female/male	placebo	none/placebo	Weekly	PO		52	0		Placebo	No			Yes	Immunoassay	Yes	No	25OHD , 125(OH)2D, Blood calcium	125(OH)2D, Blood calcium, Phosphate, ALKP, Adverse effects, Phosphorus, ALKP, Adverse events	Medium/Unclear	Unclear	Unclear	Yes	Yes	Yes	Unclear	< 50 nmol/l	111	37.5		16.4
Short- and long-term safety of weekly high-dose vitamin D3 supplementation in school children	J. Maalouf, M. Nabulsi, R. Vieth, S. Kimball, R. El-Rassi, Z. Mahfoud and F. G. El-Hajj	The Journal of Clinical Endocrinology and Metabolis	English	2008	18445674	RCT/qRCT	Middle East	1	25	8	Yes	Yes	School-based		2	Healthy/Subclinical VDD	Primary school age, Adolescents	10-17 years	Both female/male	Weekly	4000-39999	Weekly	PO	D3	8	14000		constant dose	No			Yes	Immunoassay	Yes	No	25OHD , 125(OH)2D, Blood calcium	25OHD , 125(OH)2D, Blood calcium, Adverse effects	Medium/Unclear	Unclear	Unclear	No	Yes	Yes	Unclear	> 80 nmol/l	8		8
Short- and long-term safety of weekly high-dose vitamin D3 supplementation in school children	J. Maalouf, M. Nabulsi, R. Vieth, S. Kimball, R. El-Rassi, Z. Mahfoud and F. G. El-Hajj	The Journal of Clinical Endocrinology and Metabolis	English	2008	18445674	RCT/qRCT	Middle East	1	340	114	Yes	Yes	School-based		3	Healthy/Subclinical VDD	Primary school age, Adolescents	10-17 years	Both female/male	Weekly	1000-3999	Weekly	PO	D3	52	1400		constant dose	No			Yes	Immunoassay	Yes	No	25OHD , 125(OH)2D, Blood calcium	125(OH)2D, Blood calcium, Phosphate, ALKP, Adverse effects, Phosphorus, ALKP, Adverse events	Medium/Unclear	Unclear	Unclear	Yes	Yes	Yes	Unclear	< 50 nmol/l	114	37.45		20.25
Short- and long-term safety of weekly high-dose vitamin D3 supplementation in school children	J. Maalouf, M. Nabulsi, R. Vieth, S. Kimball, R. El-Rassi, Z. Mahfoud and F. G. El-Hajj	The Journal of Clinical Endocrinology and Metabolis	English	2008	18445674	RCT/qRCT	Middle East	1	25	9	Yes	Yes	School-based		2	Healthy/Subclinical VDD	Primary school age, Adolescents	10-17 years	Both female/male	Weekly	4000-39999	Weekly	PO	D3	8	14000		constant dose	No			Yes	Immunoassay	Yes	No	25OHD , 125(OH)2D, Blood calcium	25OHD , 125(OH)2D, Blood calcium, Adverse effects	Medium/Unclear	Unclear	Unclear	No	Yes	Yes	Unclear	> 80 nmol/l	9		1
Short- and long-term safety of weekly high-dose vitamin D3 supplementation in school children	J. Maalouf, M. Nabulsi, R. Vieth, S. Kimball, R. El-Rassi, Z. Mahfoud and F. G. El-Hajj	The Journal of Clinical Endocrinology and Metabolis	English	2008	18445674	RCT/qRCT	Middle East	1	340	115	Yes	Yes	School-based		3	Healthy/Subclinical VDD	Primary school age, Adolescents	10-17 years	Both female/male	Weekly	4000-39999	Weekly	PO	D3	52	14000		constant dose	No			Yes	Immunoassay	Yes	No	25OHD , 125(OH)2D, Blood calcium	125(OH)2D, Blood calcium, Phosphate, ALKP, Adverse effects, Phosphorus, ALKP, Adverse events	Medium/Unclear	Unclear	Unclear	Yes	Yes	Yes	Unclear	< 50 nmol/l	115	36.425		19.025
Treatment of hypovitaminosis D in infants and toddlers	C. M. Gordon, A. L. Williams, H. A. Feldman, J. May, L. Sinclair, A. Vasquez and J. E. Cox	The Journal of Clinical Endocrinology and Metabolis	English	2008	18413426	RCT/qRCT	North America	1	40	12	Yes	Yes	Outpatient - hospital clinic		3	Healthy/Subclinical VDD	Infants, Toddlers	8-24 months	Both female/male	Daily	1000-3999	Daily	PO	D2	6	2000		constant dose	Yes	50 mg/kg/day		Yes	Immunoassay	Yes	No	25OHD	Blood calcium, ALKP, PTH, Magnesium	Medium/Unclear	Yes	Yes	Unclear	Unclear	No	Yes	< 50 nmol/l	12	39.25
Treatment of hypovitaminosis D in infants and toddlers	C. M. Gordon, A. L. Williams, H. A. Feldman, J. May, L. Sinclair, A. Vasquez and J. E. Cox	The Journal of Clinical Endocrinology and Metabolis	English	2008	18413426	RCT/qRCT	North America	1	40	14	Yes	Yes	Outpatient - hospital clinic		3	Healthy/Subclinical VDD	Infants, Toddlers	8-24 months	Both female/male	Weekly	Above 40000	Weekly	PO	D2	6	50000		constant dose	Yes	50 mg/kg/day		Yes	Immunoassay	Yes	No	25OHD	Blood calcium, ALKP, PTH, Magnesium	Medium/Unclear	Yes	Yes	Unclear	Unclear	No	Yes	< 50 nmol/l	14	34.5
Treatment of hypovitaminosis D in infants and toddlers	C. M. Gordon, A. L. Williams, H. A. Feldman, J. May, L. Sinclair, A. Vasquez and J. E. Cox	The Journal of Clinical Endocrinology and Metabolis	English	2008	18413426	RCT/qRCT	North America	1	40	14	Yes	Yes	Outpatient - hospital clinic		3	Healthy/Subclinical VDD	Infants, Toddlers	8-24 months	Both female/male	Daily	1000-3999	Daily	PO	D3	6	2000		constant dose	Yes	50 mg/kg/day		Yes	Immunoassay	Yes	No	25OHD	Blood calcium, ALKP, PTH, Magnesium	Medium/Unclear	Yes	Yes	Unclear	Unclear	No	Yes	< 50 nmol/l	14	34.25
Comparison of oral versus injectable vitamin-D for the treatment of nutritional vitamin-D deficiency rickets	A. G. Billoo, G. Murtaza, M. A. Memon, S. A. Khaskheli, K. Iqbal and M. H. Rao	Journal of the College of Physicians and Surgeons -	English	2009	19576150	Controlled non-randomized	East Asia	1	100	50	No comment on REB approval	Yes	Outpatient - hospital clinic		2	Rickets	Infants, Toddlers	0.5-3 years	Both female/male	Intermittent	Above 40000	Single	PO	D3		200000		constant dose	No			No		Yes	No	Clinical Rickets	Blood calcium, Phosphate, ALKP, Hematology	Medium/Unclear	Unclear	Unclear	No	Yes	Yes	Unclear	Not measured/reported
Comparison of oral versus injectable vitamin-D for the treatment of nutritional vitamin-D deficiency rickets	A. G. Billoo, G. Murtaza, M. A. Memon, S. A. Khaskheli, K. Iqbal and M. H. Rao	Journal of the College of Physicians and Surgeons -	English	2009	19576150	Controlled non-randomized	East Asia	1	100	50	No comment on REB approval	Yes	Outpatient - hospital clinic		2	Rickets	Infants, Toddlers	0.5-3 years	Both female/male	Intermittent	Above 40000	Single	IM	D3		200000		constant dose	No			No		Yes	No	Clinical Rickets	Blood calcium, Phosphate, ALKP, Hematology	Medium/Unclear	Unclear	Unclear	No	Yes	Yes	Unclear	Not measured/reported
Effect of bimonthly supplementation with oral cholecalciferol on serum 25-hydroxyvitamin D concentrations in HIV-infected children and adolescents.	S. M. Arpadi, D. McMahon, E. J. Abrams, M. Bamji, M. Purswani, E. S. Engelson, M. Horlick and E. Shane	Pediatrics	English	2009	19117833	RCT/qRCT	North America	4	59	29	Yes	Yes	Outpatient - hospital clinic		2	HIV	Primary school age, Adolescents	6-16 years	Both female/male	placebo	none/placebo	q2 monthly	PO			0		Placebo	No			Yes	Not stated	Yes	Yes	25OHD	Blood calcium, Urine calcium, Anthropometric measures, Immune/Inflammatory marker	Low	Yes	Yes	Yes	Yes	No	Yes	50 - 80 nmol/l	27	60.5
Effect of bimonthly supplementation with oral cholecalciferol on serum 25-hydroxyvitamin D concentrations in HIV-infected children and adolescents.	S. M. Arpadi, D. McMahon, E. J. Abrams, M. Bamji, M. Purswani, E. S. Engelson, M. Horlick and E. Shane	Pediatrics	English	2009	19117833	RCT/qRCT	North America	4	59	29	Yes	Yes	Outpatient - hospital clinic		2	HIV	Primary school age, Adolescents	6-16 years	Both female/male	Intermittent	Above 40000	q2 monthly	PO	D3		100000		constant dose	Yes	1 gram per day		Yes	Not stated	Yes	Yes	25OHD	Blood calcium, Urine calcium, Anthropometric measures, Immune/Inflammatory marker	Low	Yes	Yes	Yes	Yes	No	Yes	50 - 80 nmol/l	29	62
Meals and dephytinization affect calcium and zinc absorption in Nigerian children with rickets	T. D. Thacher, O. Aliu, I. J. Griffin, S. D. Pam, K. O. O'Brien, G. E. Imade and S. A. Abrams	The Journal of Nutrition	English	2009	19321589	Single arm	Africa	1	19	19	Yes	Yes	Outpatient - hospital clinic		2	Rickets	Toddlers, Primary school age	2-10 years	Both female/male	Weekly	Above 40000	Weekly	PO	D2	7	50000		constant dose	Yes	600 mg/day		Yes	Immunoassay	Yes	Yes	Calcium absorption, Zinc absorption	25OHD, Blood calcium, Phosphate, ALKP, PTH	High	No	No	No	Yes	No	Yes	< 50 nmol/l	19	27.8		11.3
Meals and dephytinization affect calcium and zinc absorption in Nigerian children with rickets	T. D. Thacher, O. Aliu, I. J. Griffin, S. D. Pam, K. O. O'Brien, G. E. Imade and S. A. Abrams	The Journal of Nutrition	English	2009	19321589	Single arm	Africa	1	15	15	Yes	Yes	Outpatient - hospital clinic		2	Healthy/Subclinical VDD	Toddlers, Primary school age	2-10 years	Both female/male	Weekly	Above 40000	Weekly	PO	D2	7	50000		constant dose	Yes	600 mg/day		Yes	Immunoassay	Yes	Yes	Calcium absorption, Zinc absorption	25OHD, Blood calcium, Phosphate, ALKP, PTH	High	No	No	No	Yes	No	No	50 - 80 nmol/l	15	55.8		8.3
The effect of oral steroids with and without vitamin D3 on early efficacy of immunotherapy in asthmatic children	P. Majak, B. Rychlik and I. Stelmach	Clinical & Experimental Allergy	English	2009	19817753	RCT/qRCT	Europe	1	54	18	Yes	Yes	Outpatient - hospital clinic		3	Asthma	Primary school age	6-12 years	Both female/male	placebo	none/placebo	Weekly	PO		12	0		Placebo	No			Yes	Immunoassay	No	No	Respiratory marker	25OHD, Immune/Inflammatory marker	Medium/Unclear	Yes	Yes	Yes	Yes	Yes	Yes	50 - 80 nmol/l	15	78.5		6.75
The effect of oral steroids with and without vitamin D3 on early efficacy of immunotherapy in asthmatic children	P. Majak, B. Rychlik and I. Stelmach	Clinical & Experimental Allergy	English	2009	19817753	RCT/qRCT	Europe	1	54	18	Yes	Yes	Outpatient - hospital clinic		3	Asthma	Primary school age	6-12 years	Both female/male	placebo	none/placebo	Weekly	PO		12	0		Placebo	No		Prednisone	Yes	Immunoassay	No	No	Respiratory marker	25OHD, Immune/Inflammatory marker	Medium/Unclear	Yes	Yes	Yes	Yes	Yes	Yes	50 - 80 nmol/l	17	78.25		8.5
The effect of oral steroids with and without vitamin D3 on early efficacy of immunotherapy in asthmatic children	P. Majak, B. Rychlik and I. Stelmach	Clinical & Experimental Allergy	English	2009	19817753	RCT/qRCT	Europe	1	54	18	Yes	Yes	Outpatient - hospital clinic		3	Asthma	Primary school age	6-12 years	Both female/male	Weekly	1000-3999	Weekly	PO	D3	12	1000		constant dose	No		Prednisone	Yes	Immunoassay	No	No	Respiratory marker	25OHD, Immune/Inflammatory marker	Medium/Unclear	Yes	Yes	Yes	Yes	Yes	Yes	> 80 nmol/l	16	80		7.75
The effect of vitamin D2 and vitamin D3 on intestinal calcium absorption in Nigerian children with rickets	T. D. Thacher, M. O. Obadofin, K. O. O'Brien and S. A. Abrams	The Journal of Clinical Endocrinology and Metabolis	English	2009	19567516	RCT/qRCT	Africa	1	17	9	Yes	Yes	Outpatient - hospital clinic		2	Rickets	Toddlers, Primary school age	24-144 mont	Both female/male	Intermittent	Above 40000	Single	PO	D2		50000		constant dose	Yes	120 mg		Yes	LC/MS	Yes	Yes	Calcium absorption	25OHD , 125(OH)2D, Blood calcium, Urine calcium, Phosphate, ALKP, Serum vitamin D3/2	Medium/Unclear	Yes	Yes	Unclear	Yes	No	Yes	< 50 nmol/l	9		4
The effect of vitamin D2 and vitamin D3 on intestinal calcium absorption in Nigerian children with rickets	T. D. Thacher, M. O. Obadofin, K. O. O'Brien and S. A. Abrams	The Journal of Clinical Endocrinology and Metabolis	English	2009	19567516	RCT/qRCT	Africa	1	17	8	Yes	Yes	Outpatient - hospital clinic		2	Rickets	Toddlers, Primary school age	24-144 mont	Both female/male	Intermittent	Above 40000	Single	PO	D3		50000		constant dose	Yes	120 mg		Yes	LC/MS	Yes	Yes	Calcium absorption	25OHD , 125(OH)2D, Blood calcium, Urine calcium, Phosphate, ALKP, Serum vitamin D3/2	Medium/Unclear	Yes	Yes	Unclear	Yes	No	Yes	50 - 80 nmol/l	8		5
Urinary calcium/creatinin ratio with different dosages of vitamin D3 prophylaxis in infants	A. Shajari, M. Shakiba, F. Nourani, M. Zaki and M. Kheirandish	Iranian Journal of Pediatrics	English	2009	N/A	RCT/qRCT	Middle East	1	90	30	Yes	Yes	Outpatient - hospital clinic		3	Healthy/Subclinical VDD	Neonate	15-15 days	Both female/male	Daily	Under RDA/AI	Daily	PO	D3	10	200		constant dose	No			Yes	Not stated	No	Yes	Urine calcium	25OHD	Medium/Unclear	Unclear	Unclear	No	Unclear	No	Unclear	Not measured/reported
Urinary calcium/creatinin ratio with different dosages of vitamin D3 prophylaxis in infants	A. Shajari, M. Shakiba, F. Nourani, M. Zaki and M. Kheirandish	Iranian Journal of Pediatrics	English	2009	N/A	RCT/qRCT	Middle East	1	90	30	Yes	Yes	Outpatient - hospital clinic		3	Healthy/Subclinical VDD	Neonate	15-15 days	Both female/male	Daily	Under RDA/AI	Daily	PO	D3	10	400		constant dose	No			Yes	Not stated	No	Yes	Urine calcium	25OHD	Medium/Unclear	Unclear	Unclear	No	Unclear	No	Unclear	Not measured/reported
Urinary calcium/creatinin ratio with different dosages of vitamin D3 prophylaxis in infants	A. Shajari, M. Shakiba, F. Nourani, M. Zaki and M. Kheirandish	Iranian Journal of Pediatrics	English	2009	N/A	RCT/qRCT	Middle East	1	90	30	Yes	Yes	Outpatient - hospital clinic		3	Healthy/Subclinical VDD	Neonate	15-15 days	Both female/male	Intermittent	Above 40000	Single	PO	D3	6	50000		constant dose	No			Yes	Not stated	No	Yes	Urine calcium	25OHD	Medium/Unclear	Unclear	Unclear	No	Unclear	No	Unclear	Not measured/reported
Very high-dose ergocalciferol is effective for correcting vitamin D deficiency in children and young adults with cystic fibrosis	S. R. Boas, J. R. Hageman, L. T. Ho and M. Liveris	Journal of Cystic Fibrosis	English	2009	19447079	Single arm	North America	1	6	6	No comment on REB approval	No comment on consent process	Outpatient - hospital clinic		1	Cystic fibrosis	Primary school age, Adolescents	not stated	Both female/male	Daily	Above 40000	Daily	PO	D3	2	50000		constant dose	No			Yes	Immunoassay	No	No	25OHD	Respiratory marker	High	No	No	No	Yes	No	Unclear	50 - 80 nmol/l	6	53.75		12.75
Vitamin D receptor gene polymorphisms modulate the skeletal response to vitamin D supplementation in healthy girls	A. Arabi, L. Zahed, Z. Mahfoud, L. El-Onsi, M. Nabulsi, J. Maalouf and G. Fuleihan	Bone	English	2009	19647104	RCT/qRCT	Middle East	1	179	54	Yes	Yes	School-based		3	Healthy/Subclinical VDD	Primary school age, Adolescents	10-17 years	Females only	placebo	none/placebo	Daily	PO		52	0		Placebo	No			Yes	Immunoassay	Yes	No	Clinical Rickets	25OHD , 125(OH)2D, Blood calcium, Phosphate, Bone mass marker	Medium/Unclear	Unclear	Unclear	Yes	Unclear	No	Unclear	< 50 nmol/l	54	35.25		20.25
Vitamin D receptor gene polymorphisms modulate the skeletal response to vitamin D supplementation in healthy girls	A. Arabi, L. Zahed, Z. Mahfoud, L. El-Onsi, M. Nabulsi, J. Maalouf and G. Fuleihan	Bone	English	2009	19647104	RCT/qRCT	Middle East	1	179	58	Yes	Yes	School-based		3	Healthy/Subclinical VDD	Primary school age, Adolescents	10-17 years	Females only	Weekly	1000-3999	Weekly	PO	D3	52	1400		constant dose	No			Yes	Immunoassay	Yes	No	Clinical Rickets	25OHD , 125(OH)2D, Blood calcium, Phosphate, Bone mass marker	Medium/Unclear	Unclear	Unclear	Yes	Unclear	No	Unclear	< 50 nmol/l	58	35.25		20.25
Vitamin D receptor gene polymorphisms modulate the skeletal response to vitamin D supplementation in healthy girls	A. Arabi, L. Zahed, Z. Mahfoud, L. El-Onsi, M. Nabulsi, J. Maalouf and G. Fuleihan	Bone	English	2009	19647104	RCT/qRCT	Middle East	1	179	55	Yes	Yes	School-based		3	Healthy/Subclinical VDD	Primary school age, Adolescents	10-17 years	Females only	Weekly	4000-39999	Weekly	PO	D3	52	14000		constant dose	No			Yes	Immunoassay	Yes	No	Clinical Rickets	25OHD , 125(OH)2D, Blood calcium, Phosphate, Bone mass marker	Medium/Unclear	Unclear	Unclear	Yes	Unclear	No	Unclear	< 50 nmol/l	55	35.25		20.25
A 16-week randomized clinical trial of 2000 international units daily vitamin D3 supplementation in black youth: 25-hydroxyvitamin D, adiposity, and arterial stiffness	Y. Dong, I. S. Stallmann-Jorgensen, N. K. Pollock, R. A. Harris, D. Keeton, Y. Huang, K. Li, R. Bassali, D. H. Guo, J. Thomas, G. L. Pierce,	The Journal of Clinical Endocrinology and Metabolis	English	2010	20660028	RCT/qRCT	North America	1	49	24	Yes	Yes	School-based		2	Healthy/Subclinical VDD	Adolescents	14-18 years	Both female/male	Daily	Under RDA/AI	Daily	PO	D3	16	400		constant dose	No			Yes	Immunoassay	Yes	Yes	25OHD	Blood calcium, Urine calcium, Cardiovascular marker, Arterial stiffness	Low	Yes	Yes	No	Yes	No	Yes	< 50 nmol/l	21	33.3		10.3
A 16-week randomized clinical trial of 2000 international units daily vitamin D3 supplementation in black youth: 25-hydroxyvitamin D, adiposity, and arterial stiffness	Y. Dong, I. S. Stallmann-Jorgensen, N. K. Pollock, R. A. Harris, D. Keeton, Y. Huang, K. Li, R. Bassali, D. H. Guo, J. Thomas, G. L. Pierce,	The Journal of Clinical Endocrinology and Metabolis	English	2010	20660028	RCT/qRCT	North America	1	49	25	Yes	Yes	School-based		2	Healthy/Subclinical VDD	Adolescents	14-18 years	Both female/male	Daily	1000-3999	Daily	PO	D3	16	2000		constant dose	No			Yes	Immunoassay	Yes	Yes	25OHD	Blood calcium, Urine calcium, Cardiovascular marker, Arterial stiffness	Low	Yes	Yes	No	Yes	No	Yes	< 50 nmol/l	23	33.5		9.9
A randomized, controlled trial of vitamin D supplementation upon musculoskeletal health in postmenarchal females	K. A. Ward, G. Das, S. A. Roberts, J. L. Berry, J. E. Adams, R. Rawer and M. Z. Mughal	The Journal of Clinical Endocrinology and Metabolis	English	2010	20631020	RCT/qRCT	Europe	1	73	37	Yes	Yes	School-based		2	Healthy/Subclinical VDD	Primary school age, Adolescents	12-14 years	Females only	Intermittent	Above 40000	q3 monthly	PO	D2		150000		constant dose	No			Yes	LC/MS	Yes	No	Bone mass marker	25OHD, Blood calcium, Phosphate, PTH, Anthropometric measures, Renal marker	Low	Yes	Yes	Yes	Unclear	No	Yes	< 50 nmol/l	36	18.1		8
A randomized, controlled trial of vitamin D supplementation upon musculoskeletal health in postmenarchal females	K. A. Ward, G. Das, S. A. Roberts, J. L. Berry, J. E. Adams, R. Rawer and M. Z. Mughal	The Journal of Clinical Endocrinology and Metabolis	English	2010	20631020	RCT/qRCT	Europe	1	73	36	Yes	Yes	School-based		2	Healthy/Subclinical VDD	Primary school age, Adolescents	12-14 years	Females only	placebo	none/placebo	q3 monthly	PO			0		Placebo	No			Yes	LC/MS	Yes	No	Bone mass marker	25OHD, Blood calcium, Phosphate, PTH, Anthropometric measures, Renal marker	Low	Yes	Yes	Yes	Unclear	No	Yes	< 50 nmol/l	36	17.9		7.4
Administration of a single Winter oral dose of 200,000 IU of vitamin D3 in adolescents in Normandy: evaluation of the safety and vitamin D status obtained	E. Mallet, F. Philippe, M. Castanet and J. P. Basuyau	Archives de pÃ©diatrie	French	2010	20542672	Single arm	Europe	1	64	27	Yes	No comment on consent process	School-based		3	Healthy/Subclinical VDD	Primary school age, Adolescents	not stated	Both female/male	Other/non-vitamin	none/placebo							Other/non-vitamin	No			Yes	Other	Yes	Yes	25OHD	Blood calcium, Urine calcium, PTH	High	Unclear	Unclear	No	Unclear	Yes	Unclear	50 - 80 nmol/l	27	63.8		19.8
Administration of a single Winter oral dose of 200,000 IU of vitamin D3 in adolescents in Normandy: evaluation of the safety and vitamin D status obtained	E. Mallet, F. Philippe, M. Castanet and J. P. Basuyau	Archives de pÃ©diatrie	French	2010	20542672	Single arm	Europe	1	64	20	Yes	No comment on consent process	School-based		3	Healthy/Subclinical VDD	Primary school age, Adolescents	not stated	Both female/male	Intermittent	Above 40000	Single	PO	D3		200000		constant dose	No			Yes	Other	Yes	Yes	25OHD	Blood calcium, Urine calcium, PTH	High	Unclear	Unclear	No	Unclear	Yes	Unclear	Not measured/reported
Administration of a single Winter oral dose of 200,000 IU of vitamin D3 in adolescents in Normandy: evaluation of the safety and vitamin D status obtained	E. Mallet, F. Philippe, M. Castanet and J. P. Basuyau	Archives de pÃ©diatrie	French	2010	20542672	Single arm	Europe	1	64	17	Yes	No comment on consent process	School-based		3	Healthy/Subclinical VDD	Primary school age, Adolescents	not stated	Both female/male	Intermittent	Above 40000	Single	PO	D3		200000		constant dose	No			Yes	Other	Yes	Yes	25OHD	Blood calcium, Urine calcium, PTH	High	Unclear	Unclear	No	Unclear	Yes	Unclear	Not measured/reported
Circulating insulin-like growth factor binding protein-4 (IGFBP-4) is not regulated by parathyroid hormone and vitamin D in vivo: evidence from children with rickets	A. Bereket, Y. Cesur, B. Ozkan, E. Adal, S. Turan, S. H. Onan, H. Doneray, T. Akcay and G. Haklar	Journal of Clinical Research in Pediatric Endocrino	English	2010	21274331	Single arm	Middle East	2	22	22	No comment on REB approval	Yes	Outpatient - hospital clinic		1	Rickets	Neonate, Infants, Toddlers, Primary school age	not stated	Not specified	Intermittent	Above 40000	Single	PO	Unclear		300000		constant dose	No			Yes	Immunoassay	Yes	No	PTH, Insulin like Growth Factor	25OHD, Blood calcium, Phosphate, ALKP	High	No	No	No	Yes	Yes	Unclear	< 50 nmol/l	22	19.375		6.225
Clinical responses to a mega-dose of vitamin D3 in infants and toddlers with vitamin D deficiency rickets	A. T. Soliman, M. El-Dabbagh, A. Adel, M. Al Ali, E. M. Aziz Bedair and R. K. Elalaily	Journal of Tropical Pediatrics	English	2010	19506025	Single arm	Middle East	1	40	40	Yes	Yes	Outpatient - hospital clinic		1	Rickets	Infants, Toddlers	0.1-3 years	Both female/male	Intermittent	Above 40000	Single	IM	D3		600000	10000 IU/	Dose varies by age/weight/bsa	No			Yes	Immunoassay	Yes	No	25OHD, Clinical Rickets, ALKP, Anthropometric measures	Blood calcium, Clinical Rickets, Bone mass marker, PTH	High	No	No	No	Unclear	No	Unclear	< 50 nmol/l	40	15.6		12.275
Combination of bolus dose vitamin D with routine vaccination in infants: a randomised trial	M. Shakiba, S. Sadr, Z. Nefei, H. Mozaffari-Khosravi, M. H. Lotfi and M. H. Bemanian	Singapore medical journal	English	2010	20593151	RCT/qRCT	Middle East	1	120	45	Yes	Yes	Outpatient - hospital clinic		3	Healthy/Subclinical VDD	Neonate	15-30 days	Both female/male	Daily	Under RDA/AI	Daily	PO	D3	24	200		constant dose	No			Yes	Immunoassay	Yes	No	25OHD	Blood calcium, Adverse effects	Medium/Unclear	Yes	Yes	Yes	No	No	Unclear	Not measured/reported
Combination of bolus dose vitamin D with routine vaccination in infants: a randomised trial	M. Shakiba, S. Sadr, Z. Nefei, H. Mozaffari-Khosravi, M. H. Lotfi and M. H. Bemanian	Singapore medical journal	English	2010	20593151	RCT/qRCT	Middle East	1	120	45	Yes	Yes	Outpatient - hospital clinic		3	Healthy/Subclinical VDD	Neonate	15-30 days	Both female/male	Daily	Under RDA/AI	Daily	PO	D3	24	400		constant dose	No			Yes	Immunoassay	Yes	No	25OHD	Blood calcium, Adverse effects	Medium/Unclear	Yes	Yes	Yes	No	No	Unclear	Not measured/reported
Combination of bolus dose vitamin D with routine vaccination in infants: a randomised trial	M. Shakiba, S. Sadr, Z. Nefei, H. Mozaffari-Khosravi, M. H. Lotfi and M. H. Bemanian	Singapore medical journal	English	2010	20593151	RCT/qRCT	Middle East	1	120	30	Yes	Yes	Outpatient - hospital clinic		3	Healthy/Subclinical VDD	Neonate	15-30 days	Both female/male	Intermittent	Above 40000	q2 monthly	PO	D3		50000		constant dose	No			Yes	Immunoassay	Yes	No	25OHD	Blood calcium, Adverse effects	Medium/Unclear	Yes	Yes	Yes	No	No	Unclear	Not measured/reported
Comparison of metabolism of vitamins D2 and D3 in children with nutritional rickets	T. D. Thacher, P. R. Fischer, M. O. Obadofin, M. a. Levine, R. J. Singh and J. M. Pettifor	Journal of Bone and Mineral Research	English	2010	20499377	Single arm	Africa	1	13	12	Yes	Yes	Outpatient - hospital clinic		1	Rickets	Toddlers, Primary school age	not stated	Both female/male	Intermittent	Above 40000	Single	PO	D3		50000		constant dose	No			Yes	LC/MS	Yes	No	25OHD	125(OH)2D, Blood calcium, Phosphate, ALKP	High	No	No	No	Yes	Yes	Yes	< 50 nmol/l	12	37.5
Comparison of metabolism of vitamins D2 and D3 in children with nutritional rickets	T. D. Thacher, P. R. Fischer, M. O. Obadofin, M. a. Levine, R. J. Singh and J. M. Pettifor	Journal of Bone and Mineral Research	English	2010	20499377	RCT/qRCT	Africa	1	23	12	Yes	Yes	Outpatient - hospital clinic		2	Healthy/Subclinical VDD	Toddlers, Primary school age	not stated	Both female/male	Intermittent	Above 40000	Single	PO	D2		50000		constant dose	No			Yes	LC/MS	Yes	No	25OHD	125(OH)2D, Blood calcium, Phosphate, ALKP	Medium/Unclear	Unclear	Unclear	No	Yes	No	Yes	50 - 80 nmol/l	11	65
Comparison of metabolism of vitamins D2 and D3 in children with nutritional rickets	T. D. Thacher, P. R. Fischer, M. O. Obadofin, M. a. Levine, R. J. Singh and J. M. Pettifor	Journal of Bone and Mineral Research	English	2010	20499377	RCT/qRCT	Africa	1	23	11	Yes	Yes	Outpatient - hospital clinic		2	Healthy/Subclinical VDD	Toddlers, Primary school age	not stated	Both female/male	Intermittent	Above 40000	Single	PO	D3		50000		constant dose	No			Yes	LC/MS	Yes	No	25OHD	125(OH)2D, Blood calcium, Phosphate, ALKP	Medium/Unclear	Unclear	Unclear	No	Yes	No	Yes	50 - 80 nmol/l	10	70
Daily supplementation with 25 Î¼g cholecalciferol does not increase calcium absorption or skeletal retention in adolescent girls with low serum 25-hydroxyvitamin D	C. Y. Park, K. M. Hill, A. E. Elble, B. R. Martin, L. A. DiMeglio, M. Peacock, G. P. McCabe and C. M. Weaver	The Journal of Nutrition	English	2010	20962148	Single arm	North America	1	13	13	Yes	Yes			1	Healthy/Subclinical VDD	Primary school age, Adolescents	12-14 years	Females only	Daily	1000-3999	Daily	PO	D3	4	1000		constant dose	Yes	325 mg/day		Yes	Immunoassay	Yes	Yes	Calcium absorption	25OHD , 125(OH)2D, Blood calcium, Urine calcium, Phosphate, PTH, Bone turnover markers, BAP, Phosphate, Osteocalcin	High	No	No	No	Yes	Yes	No	< 50 nmol/l	11	46.8
Effects of different doses of oral cholecalciferol on serum 25(OH)D, PTH, calcium and bone markers during fall and winter in schoolchildren	A. A. Ghazi, F. Hosseinpanah, M. Ardakani, S. Ghazi, M. Hedayati and F. Azizi	European Journal of Clinical Nutrition	English	2010	20823895	RCT/qRCT	Middle East	1	210	70	Yes	Yes	School-based		3	Healthy/Subclinical VDD	Adolescents	14-20 years	Both female/male	Intermittent	Above 40000	Monthly	PO	D3	20	50000		constant dose	No			Yes	Immunoassay	Yes	Yes	25OHD	Blood calcium, Urine calcium, PTH	Low	Yes	Yes	Yes	Yes	No	No	< 50 nmol/l	70	32.1		22.1
Effects of different doses of oral cholecalciferol on serum 25(OH)D, PTH, calcium and bone markers during fall and winter in schoolchildren	A. A. Ghazi, F. Hosseinpanah, M. Ardakani, S. Ghazi, M. Hedayati and F. Azizi	European Journal of Clinical Nutrition	English	2010	20823895	RCT/qRCT	Middle East	1	210	70	Yes	Yes	School-based		3	Healthy/Subclinical VDD	Adolescents	14-20 years	Both female/male	Intermittent	Above 40000	q2 monthly	PO	D3		50000		constant dose	No			Yes	Immunoassay	Yes	Yes	25OHD	Blood calcium, Urine calcium, PTH	Low	Yes	Yes	Yes	Yes	No	No	< 50 nmol/l	70	28.25		14.5
Effects of different doses of oral cholecalciferol on serum 25(OH)D, PTH, calcium and bone markers during fall and winter in schoolchildren	A. A. Ghazi, F. Hosseinpanah, M. Ardakani, S. Ghazi, M. Hedayati and F. Azizi	European Journal of Clinical Nutrition	English	2010	20823895	RCT/qRCT	Middle East	1	210	70	Yes	Yes	School-based		3	Healthy/Subclinical VDD	Adolescents	14-20 years	Both female/male	placebo	none/placebo	Monthly	PO		20	0		Placebo	No			Yes	Immunoassay	Yes	Yes	25OHD	Blood calcium, Urine calcium, PTH	Low	Yes	Yes	Yes	Yes	No	No	< 50 nmol/l	70	29		18
Effects of vitamin D supplementation to children diagnosed with pneumonia in Kabul: a randomised controlled trial	S. Manaseki-Holland, G. Qader, M. M. Isaq, J. Bruce, M. M. Zulf, D. Chandramohan and G. Walraven	Tropical Medicine & International Health	English	2010	20723187	RCT/qRCT	East Asia	1	454	229	Yes	Yes	Combined inpatient-outpatient	Combined outpatient/inpa	2	Pneumonia	Infants, Toddlers	1-36 months	Both female/male	placebo	none/placebo	Single	PO			0		Placebo	No		Antibiotics	No		No	No	Respiratory marker	Immune/Inflammatory marker, Adverse effects, Pneumonia occurrence, Duration of illness	Low	Yes	Yes	Yes	Yes	Yes	Yes	Not measured/reported
Effects of vitamin D supplementation to children diagnosed with pneumonia in Kabul: a randomised controlled trial	S. Manaseki-Holland, G. Qader, M. M. Isaq, J. Bruce, M. M. Zulf, D. Chandramohan and G. Walraven	Tropical Medicine & International Health	English	2010	20723187	RCT/qRCT	East Asia	1	454	224	Yes	Yes	Combined inpatient-outpatient	Combined outpatient/inpa	2	Pneumonia	Infants, Toddlers	1-36 months	Both female/male	Intermittent	Above 40000	Single	PO	D3		100000		constant dose	No		Antibiotics	No		No	No	Respiratory marker	Immune/Inflammatory marker, Adverse effects, Pneumonia occurrence, Duration of illness	Low	Yes	Yes	Yes	Yes	Yes	Yes	Not measured/reported
Impact of two regimens of vitamin D supplementation on calcium - vitamin D - PTH axis of schoolgirls of Delhi	R. K. Marwaha, N. Tandon, N. Agarwal, S. Puri, R. Agarwal, S. Singh and K. Mani	Indian Pediatrics	English	2010	20308769	RCT/qRCT	East Asia	1	290	141	Yes	Yes	School-based		2	Healthy/Subclinical VDD	Primary school age, Adolescents	6-17 years	Females only	Intermittent	Above 40000	q2 monthly	PO	D3		60000		constant dose	No			Yes	Immunoassay	Yes	No	25OHD	Blood calcium, Phosphate, ALKP, PTH	Medium/Unclear	Unclear	Unclear	Unclear	Yes	Yes	Yes	< 50 nmol/l	141	30		13.5
Impact of two regimens of vitamin D supplementation on calcium - vitamin D - PTH axis of schoolgirls of Delhi	R. K. Marwaha, N. Tandon, N. Agarwal, S. Puri, R. Agarwal, S. Singh and K. Mani	Indian Pediatrics	English	2010	20308769	RCT/qRCT	East Asia	1	290	149	Yes	Yes	School-based		2	Healthy/Subclinical VDD	Primary school age, Adolescents	6-17 years	Females only	Intermittent	Above 40000	Monthly	PO	D3	26	60000		constant dose	No			Yes	Immunoassay	Yes	No	25OHD	Blood calcium, Phosphate, ALKP, PTH	Medium/Unclear	Unclear	Unclear	Unclear	Yes	Yes	Yes	< 50 nmol/l	149	31.7		12.1
Randomized trial of vitamin D supplementation to prevent seasonal influenza A in schoolchildren.	M. Urashima, T. Segawa, M. Okazaki, M. Kurihara, Y. Wada and H. Ida.	American Journal of Clinical Nutrition	English	2010	20219962	RCT/qRCT	East Asia	20	430	217	Yes	Yes	School-based		2	Healthy/Subclinical VDD	Primary school age, Adolescents	6-15 years	Both female/male	Daily	1000-3999	Daily	PO	D3	15	1200		constant dose	No			No		No	No	Immune/Inflammatory marker	Respiratory marker, Adverse effects, Incidence of Influenza A, Hospital admissions, Incidence of other Resp/Febrile illnesses	Low	Yes	Yes	Yes	Yes	Yes	Yes	Not measured/reported
Randomized trial of vitamin D supplementation to prevent seasonal influenza A in schoolchildren.	M. Urashima, T. Segawa, M. Okazaki, M. Kurihara, Y. Wada and H. Ida.	American Journal of Clinical Nutrition	English	2010	20219962	RCT/qRCT	East Asia	20	430	213	Yes	Yes	School-based		2	Healthy/Subclinical VDD	Primary school age, Adolescents	6-15 years	Both female/male	placebo	none/placebo	Daily	PO		15			Placebo	No			No		No	No	Immune/Inflammatory marker	Respiratory marker, Adverse effects, Incidence of Influenza A, Hospital admissions, Incidence of other Resp/Febrile illnesses	Low	Yes	Yes	Yes	Yes	Yes	Yes	Not measured/reported
Vitamin D insufficiency and effect of cholecalciferol in children with chronic kidney disease	P. Hari, N. Gupta, S. Hari, A. Gulati, P. Mahajan and A. Bagga	Pediatric Nephrology	English	2010	20872152	Single arm	East Asia	1	42	42	Yes	Yes			1	Renal disease	Toddlers, Primary school age, Adolescents	1-16 years	Both female/male	Daily	Above 40000	Daily	PO	D3	0.43	200000		constant dose	No			Yes	Immunoassay	Yes	No	PTH	25OHD, Blood calcium, Phosphate, ALKP, Renal marker, eGFP	High	No	No	No	Yes	Yes	Unclear	< 50 nmol/l	42		4
Vitamin D supplementation and bone mass accrual in underprivileged adolescent Indian girls	A. V. Khadilkar, M. G. Sayyad, N. J. Sanwalka, D. R. Bhandari, S. Naik, V. V. Khadilkar and M. Z. Mughal	Asia Pacific Journal of Clinical Nutrition	English	2010	21147706	RCT/qRCT	East Asia	1	50	25	Yes	Yes	School-based		2	Healthy/Subclinical VDD	Adolescents	14-15 years	Females only	placebo	none/placebo	q3 monthly	PO			0		Placebo	Yes	250 mg/day		Yes	Immunoassay	Yes	No	Bone mass marker	25OHD, Blood calcium, Phosphate, ALKP, PTH, Anthropometric measures	Medium/Unclear	Unclear	Unclear	Yes	Yes	Yes	Unclear	< 50 nmol/l	24		2
Vitamin D supplementation and bone mass accrual in underprivileged adolescent Indian girls	A. V. Khadilkar, M. G. Sayyad, N. J. Sanwalka, D. R. Bhandari, S. Naik, V. V. Khadilkar and M. Z. Mughal	Asia Pacific Journal of Clinical Nutrition	English	2010	21147706	RCT/qRCT	East Asia	1	50	25	Yes	Yes	School-based		2	Healthy/Subclinical VDD	Adolescents	14-15 years	Females only	Intermittent	Above 40000	q3 monthly	PO	D2		300000		constant dose	Yes	250 mg/day		Yes	Immunoassay	Yes	No	Bone mass marker	25OHD, Blood calcium, Phosphate, ALKP, PTH, Anthropometric measures	Medium/Unclear	Unclear	Unclear	Yes	Yes	Yes	Unclear	< 50 nmol/l	25		2
A pilot randomized controlled trial of oral calcium and vitamin D supplementation using fortified laddoos in underprivileged Indian toddlers.	V. H. Ekbote, A. V. Khadilkar, S. A. Chiplonkar, N. M. Hanumante, V. V. Khadilkar and M. Z. Mughal.	European Journal of Clinical Nutrition	English	2011	21245882	RCT/qRCT	East Asia	1	64	30	Yes	Yes	Other	Local creche for young c	2	Healthy/Subclinical VDD	Toddlers	2-3 years	Both female/male	Intermittent	4000-39999	Monthly	PO	D3	52	30000		constant dose	Yes	405 mg		Yes	Immunoassay	Yes	No	Bone mass marker	25OHD, Blood calcium, Phosphate, ALKP, PTH	Medium/Unclear	Unclear	Unclear	Yes	Yes	Yes	Yes	< 50 nmol/l	30	25		27.1
A pilot randomized controlled trial of oral calcium and vitamin D supplementation using fortified laddoos in underprivileged Indian toddlers.	V. H. Ekbote, A. V. Khadilkar, S. A. Chiplonkar, N. M. Hanumante, V. V. Khadilkar and M. Z. Mughal.	European Journal of Clinical Nutrition	English	2011	21245882	RCT/qRCT	East Asia	1	64	30	Yes	Yes	Other	Local creche for young c	2	Healthy/Subclinical VDD	Toddlers	2-3 years	Both female/male	Intermittent	4000-39999	Monthly	PO	D3	52	30000		constant dose	Yes	156 mg		Yes	Immunoassay	Yes	No	Bone mass marker	25OHD, Blood calcium, Phosphate, ALKP, PTH	Medium/Unclear	Unclear	Unclear	Yes	Yes	Yes	Yes	< 50 nmol/l	28	18.9		27
Associations of serum 25-hydroxyvitamin D and components of the metabolic syndrome in obese adolescent females	A. P. Ashraf, J. a. Alvarez, B. a. Gower, K. H. Saenz and K. L. McCormick	Obesity	English	2011	21546933	Single arm	North America	1	14	14	Yes	Yes	Outpatient - hospital clinic		1	Obesity	Primary school age, Adolescents	not stated	Females only	Weekly	Above 40000	Weekly	PO	D2	8	50000		constant dose	No			Yes	LC/MS	Yes	No	Cardiovascular marker, Glucose tolerance test	25OHD, PTH, Diabetes marker, Immune/Inflammatory marker, Glucose, Insulin, BMI, C-reactive protein, Lipid profile	High	No	No	No	Yes	Yes	Yes	< 50 nmol/l	14	26.5		11
Effect of weekly vitamin D supplements on mortality, morbidity, and growth of low birthweight term infants in India up to age 6 months: randomised controlled trial.	G. T. Kumar, H. S. Sachdev, H. Chellani, a. M. Rehman, V. Singh, H. Arora and S. Filteau.	British Medical Journal	English	2011	21628364	RCT/qRCT	East Asia	1	2079	1039	Yes	Yes	Outpatient - hospital clinic		2	Premature and/or low birth weight	Neonate	0-2 days	Both female/male	Weekly	1000-3999	Weekly	PO	D3	25	1400		constant dose	No			Yes	Immunoassay	No	No	Adverse effects, Hospital admission and mortality	25OHD, Anthropometric measures	Low	Yes	Yes	Yes	Yes	Yes	Yes	Not measured/reported
Effect of weekly vitamin D supplements on mortality, morbidity, and growth of low birthweight term infants in India up to age 6 months: randomised controlled trial.	G. T. Kumar, H. S. Sachdev, H. Chellani, a. M. Rehman, V. Singh, H. Arora and S. Filteau.	British Medical Journal	English	2011	21628364	RCT/qRCT	East Asia	1	2079	1040	Yes	Yes	Outpatient - hospital clinic		2	Premature and/or low birth weight	Neonate	0-2 days	Both female/male	placebo	none/placebo	Weekly	PO		25			Placebo	No			Yes	Immunoassay	No	No	Adverse effects, Hospital admission and mortality	25OHD, Anthropometric measures	Low	Yes	Yes	Yes	Yes	Yes	Yes	Not measured/reported
Manifestations of severe vitamin D deficiency in adolescents: effects of intramuscular injection of a megadose of cholecalciferol	A. T. Soliman, A. Adel, M. Wagdy, M. Alali and E. M. ziz Bedair	Journal of Tropical Pediatrics	English	2011	20427425	Single arm	Middle East	1	40	40	No comment on REB approval	No comment on consent process	Outpatient - hospital clinic		1	Healthy/Subclinical VDD	Primary school age, Adolescents	12-18 years	Both female/male	Intermittent	Above 40000	Single	IM	D3		600000	10,000 IU	Dose varies by age/weight/bsa	No			Yes	Immunoassay	Yes	Yes	25OHD	Blood calcium, Urine calcium, Phosphate, Clinical Rickets, PTH, Anthropometric measures, IGF-1	High	No	No	No	Yes	No	Unclear	< 50 nmol/l	40	23.25		11.5
Prophylactic vitamin D in healthy infants: assessing the need.	A. Alonso, J. Rodriguez, I. Carvajal, M. A. Prieto, R. M. Rodriguez, A. M. Perez, A. Cepeda, F. Nuno, F. Santos and C. G. o. P. w. Vitamin	Metabolism	English	2011	21663925	RCT/qRCT	Europe	11	102	48	Yes	Yes	Outpatient - hospital clinic		2	Healthy/Subclinical VDD	Neonate	0-15 days	Both female/male	Daily	RDA/AI to999	Daily	PO	D3	52	402		constant dose	No			Yes	Immunoassay	No	No	25OHD	PTH, Anthropometric measures	Medium/Unclear	Yes	Yes	No	No	Yes	Yes	Not measured/reported
Prophylactic vitamin D in healthy infants: assessing the need.	A. Alonso, J. Rodriguez, I. Carvajal, M. A. Prieto, R. M. Rodriguez, A. M. Perez, A. Cepeda, F. Nuno, F. Santos and C. G. o. P. w. Vitamin	Metabolism	English	2011	21663925	RCT/qRCT	Europe	11	102	54	Yes	Yes	Outpatient - hospital clinic		2	Healthy/Subclinical VDD	Neonate	0-15 days	Both female/male	None	none/placebo							No drug, control arm	No			Yes	Immunoassay	No	No	25OHD	PTH, Anthropometric measures	Medium/Unclear	Yes	Yes	No	No	Yes	Yes	Not measured/reported
Randomised controlled trial analysing supplementation with 250 versus 500 units of vitamin D3, sun exposure and surrounding factors in breastfed infants.	A. Siafarikas, H. Piazena, U. Feister, M. K. Bulsara, H. Meffert and V. Hesse.	Archives of disease in childhood	English	2011	20861405	RCT/qRCT	Europe	1	40	20	Yes	Yes	Inpatient - hospital		2	Healthy/Subclinical VDD	Neonate	1-1 days	Not specified	Daily	Under RDA/AI	Daily	PO	D3	6	250		constant dose	No			Yes	Immunoassay	Yes	Yes	25OHD	Blood calcium, Urine calcium, Phosphate, Clinical Rickets, ALKP	Low	Yes	Yes	No	Yes	Yes	Yes	50 - 80 nmol/l	14	68
Randomised controlled trial analysing supplementation with 250 versus 500 units of vitamin D3, sun exposure and surrounding factors in breastfed infants.	A. Siafarikas, H. Piazena, U. Feister, M. K. Bulsara, H. Meffert and V. Hesse.	Archives of disease in childhood	English	2011	20861405	RCT/qRCT	Europe	1	40	20	Yes	Yes	Inpatient - hospital		2	Healthy/Subclinical VDD	Neonate	1-1 days	Not specified	Daily	RDA/AI to999	Daily	PO	D3	6	500		constant dose	No			Yes	Immunoassay	Yes	Yes	25OHD	Blood calcium, Urine calcium, Phosphate, Clinical Rickets, ALKP	Low	Yes	Yes	No	Yes	Yes	Yes	50 - 80 nmol/l	14	68
Randomized trial of fortified milk and supplements to raise 25-hydroxyvitamin D concentrations in schoolchildren in Mongolia	J. W. Rich-Edwards, D. Ganmaa, K. Kleinman, N. Sumberzul, M. F. Holick, T. Lkhagvasuren, B. Dulguun, A. Burke and A. L. Frazier	American Journal of Clinical Nutrition	English	2011	21697075	RCT/qRCT	East Asia	2	744	101	Yes	Yes	School-based		5	Healthy/Subclinical VDD	Primary school age	9-11 years	Both female/male	placebo	none/placebo	Daily	PO		7	0		Placebo	No			Yes	LC/MS	No	No	25OHD		Low	Unclear	Unclear	No	Yes	Yes	Yes	< 50 nmol/l	101	20		10
Randomized trial of fortified milk and supplements to raise 25-hydroxyvitamin D concentrations in schoolchildren in Mongolia	J. W. Rich-Edwards, D. Ganmaa, K. Kleinman, N. Sumberzul, M. F. Holick, T. Lkhagvasuren, B. Dulguun, A. Burke and A. L. Frazier	American Journal of Clinical Nutrition	English	2011	21697075	RCT/qRCT	East Asia	2	744	140	Yes	Yes	School-based		5	Healthy/Subclinical VDD	Primary school age	9-11 years	Both female/male	Daily	Under RDA/AI	Daily	PO	D3	7	300		constant dose	No			Yes	LC/MS	No	No	25OHD		Low	Unclear	Unclear	No	Yes	Yes	Yes	< 50 nmol/l	140	20		10
Randomized trial of fortified milk and supplements to raise 25-hydroxyvitamin D concentrations in schoolchildren in Mongolia	J. W. Rich-Edwards, D. Ganmaa, K. Kleinman, N. Sumberzul, M. F. Holick, T. Lkhagvasuren, B. Dulguun, A. Burke and A. L. Frazier	American Journal of Clinical Nutrition	English	2011	21697075	RCT/qRCT	East Asia	2	744	137	Yes	Yes	School-based		5	Healthy/Subclinical VDD	Primary school age	9-11 years	Both female/male	Daily	Under RDA/AI	Daily	PO	D3	7	300		constant dose	No			Yes	LC/MS	No	No	25OHD		Low	Unclear	Unclear	No	Yes	Yes	Yes	< 50 nmol/l	137	25		12.5
Randomized trial of fortified milk and supplements to raise 25-hydroxyvitamin D concentrations in schoolchildren in Mongolia	J. W. Rich-Edwards, D. Ganmaa, K. Kleinman, N. Sumberzul, M. F. Holick, T. Lkhagvasuren, B. Dulguun, A. Burke and A. L. Frazier	American Journal of Clinical Nutrition	English	2011	21697075	RCT/qRCT	East Asia	2	744	109	Yes	Yes	School-based		5	Healthy/Subclinical VDD	Primary school age	9-11 years	Both female/male	Daily	Under RDA/AI	Daily	PO	D3	7	300		constant dose	No			Yes	LC/MS	No	No	25OHD		Low	Unclear	Unclear	No	Yes	Yes	Yes	< 50 nmol/l	109	17.5		7.5
Randomized trial of fortified milk and supplements to raise 25-hydroxyvitamin D concentrations in schoolchildren in Mongolia	J. W. Rich-Edwards, D. Ganmaa, K. Kleinman, N. Sumberzul, M. F. Holick, T. Lkhagvasuren, B. Dulguun, A. Burke and A. L. Frazier	American Journal of Clinical Nutrition	English	2011	21697075	RCT/qRCT	East Asia	2	744	92	Yes	Yes	School-based		5	Healthy/Subclinical VDD	Primary school age	9-11 years	Both female/male	Daily	1000-3999	Daily	PO	D3	1	1950		constant dose	No			Yes	LC/MS	No	No	25OHD		Low	Unclear	Unclear	No	Yes	Yes	Yes	< 50 nmol/l	92	20		10
Study to evaluate two dosage regimens of vitamin D through an academic year in middle school girls: a randomized trial	M. Shakiba, M. Ghadir, Z. Nafei, K. S. Akhavan, M. H. Lotfi and A. Shajari	Acta Medica Iranica	English	2011	22174164	RCT/qRCT	Middle East	1	102	34	No comment on REB approval	Yes	School-based		3	Healthy/Subclinical VDD	Primary school age, Adolescents	12-15 years	Females only	placebo	none/placebo	q3 monthly	PO			0		Placebo	No			Yes	Immunoassay	No	Yes	25OHD	Urine calcium	Medium/Unclear	Unclear	Unclear	No	Yes	No	Unclear	Not measured/reported
Study to evaluate two dosage regimens of vitamin D through an academic year in middle school girls: a randomized trial	M. Shakiba, M. Ghadir, Z. Nafei, K. S. Akhavan, M. H. Lotfi and A. Shajari	Acta Medica Iranica	English	2011	22174164	RCT/qRCT	Middle East	1	102	34	No comment on REB approval	Yes	School-based		3	Healthy/Subclinical VDD	Primary school age, Adolescents	12-15 years	Females only	Intermittent	Above 40000	q3 monthly	PO	D3		50000		constant dose	No			Yes	Immunoassay	No	Yes	25OHD	Urine calcium	Medium/Unclear	Unclear	Unclear	No	Yes	No	Unclear	Not measured/reported
Study to evaluate two dosage regimens of vitamin D through an academic year in middle school girls: a randomized trial	M. Shakiba, M. Ghadir, Z. Nafei, K. S. Akhavan, M. H. Lotfi and A. Shajari	Acta Medica Iranica	English	2011	22174164	RCT/qRCT	Middle East	1	102	34	No comment on REB approval	Yes	School-based		3	Healthy/Subclinical VDD	Primary school age, Adolescents	12-15 years	Females only	Intermittent	Above 40000	q3 monthly	PO	D3		100000		constant dose	No			Yes	Immunoassay	No	Yes	25OHD	Urine calcium	Medium/Unclear	Unclear	Unclear	No	Yes	No	Unclear	Not measured/reported
The optimal dose of vitamin D in growing girls during academic years: A randomized trial	M. Shakinba, S. Tefagh and Z. Nafei	Turkish Journal of Medical Sciences	English	2011	N/A	RCT/qRCT	Middle East	1	120	30	No comment on REB approval	Yes	School-based		4	Healthy/Subclinical VDD	Primary school age, Adolescents	12-15 years	Females only	Intermittent	Above 40000	Monthly	PO	D3	43.3	300000	300,000 I	Dose varies by vitamin D stat	No			Yes	Immunoassay	No	No	25OHD		Medium/Unclear	Unclear	Unclear	No	Yes	Unclear	Unclear	Not measured/reported
The optimal dose of vitamin D in growing girls during academic years: A randomized trial	M. Shakinba, S. Tefagh and Z. Nafei	Turkish Journal of Medical Sciences	English	2011	N/A	RCT/qRCT	Middle East	1	120	30	No comment on REB approval	Yes	School-based		4	Healthy/Subclinical VDD	Primary school age, Adolescents	12-15 years	Females only	Intermittent	Above 40000	q3 monthly	PO	D3	43.3	300000	300,000 I	Dose varies by vitamin D stat	No			Yes	Immunoassay	No	No	25OHD		Medium/Unclear	Unclear	Unclear	No	Yes	Unclear	Unclear	Not measured/reported
The optimal dose of vitamin D in growing girls during academic years: A randomized trial	M. Shakinba, S. Tefagh and Z. Nafei	Turkish Journal of Medical Sciences	English	2011	N/A	RCT/qRCT	Middle East	1	120	30	No comment on REB approval	Yes	School-based		4	Healthy/Subclinical VDD	Primary school age, Adolescents	12-15 years	Females only	Intermittent	Above 40000	Monthly	PO	D3	43.3	50000		constant dose	No			Yes	Immunoassay	No	No	25OHD		Medium/Unclear	Unclear	Unclear	No	Yes	Unclear	Unclear	Not measured/reported
The optimal dose of vitamin D in growing girls during academic years: A randomized trial	M. Shakinba, S. Tefagh and Z. Nafei	Turkish Journal of Medical Sciences	English	2011	N/A	RCT/qRCT	Middle East	1	120	30	No comment on REB approval	Yes	School-based		4	Healthy/Subclinical VDD	Primary school age, Adolescents	12-15 years	Females only	Intermittent	Above 40000	q3 monthly	PO	D3		100000		constant dose	No			Yes	Immunoassay	No	No	25OHD		Medium/Unclear	Unclear	Unclear	No	Yes	Unclear	Unclear	Not measured/reported
Vitamin D supplementation and CD4 count in children infected with human immunodeficiency virus	S. Kakalia, E. B. Sochett, D. Stephens, E. Assor, S. E. Read and A. Bitnun	The Journal of Pediatrics	English	2011	21820130	RCT/qRCT	North America	1	54	18	Yes	Yes	Outpatient - hospital clinic		3	HIV	Toddlers, Primary school age, Adolescents	3-18 years	Both female/male	None	none/placebo					0		No drug, control arm	No			Yes	Immunoassay	Yes	Yes	Immune/Inflammatory marker	25OHD , 125(OH)2D, Blood calcium, Urine calcium, PTH	Medium/Unclear	Yes	Yes	No	Yes	No	Yes	50 - 80 nmol/l	17	64.3		30
Vitamin D supplementation and CD4 count in children infected with human immunodeficiency virus	S. Kakalia, E. B. Sochett, D. Stephens, E. Assor, S. E. Read and A. Bitnun	The Journal of Pediatrics	English	2011	21820130	RCT/qRCT	North America	1	54	18	Yes	Yes	Outpatient - hospital clinic		3	HIV	Toddlers, Primary school age, Adolescents	3-18 years	Both female/male	Weekly	4000-39999	Weekly	PO	D3	26	5600		constant dose	No			Yes	Immunoassay	Yes	Yes	Immune/Inflammatory marker	25OHD , 125(OH)2D, Blood calcium, Urine calcium, PTH	Medium/Unclear	Yes	Yes	No	Yes	No	Yes	< 50 nmol/l	18	49.9		22.5
Vitamin D supplementation and CD4 count in children infected with human immunodeficiency virus	S. Kakalia, E. B. Sochett, D. Stephens, E. Assor, S. E. Read and A. Bitnun	The Journal of Pediatrics	English	2011	21820130	RCT/qRCT	North America	1	54	18	Yes	Yes	Outpatient - hospital clinic		3	HIV	Toddlers, Primary school age, Adolescents	3-18 years	Both female/male	Weekly	4000-39999	Weekly	PO	D3	26	11200		constant dose	No			Yes	Immunoassay	Yes	Yes	Immune/Inflammatory marker	25OHD , 125(OH)2D, Blood calcium, Urine calcium, PTH	Medium/Unclear	Yes	Yes	No	Yes	No	Yes	< 50 nmol/l	18	42.7		18.1
Bone turnover is not influenced by serum 25-hydroxyvitamin D in pubertal healthy black and white children	K. M. Hill, E. M. Laing, D. B. Hausman, A. Acton, B. R. Martin, G. P. McCabe, C. M. Weaver, R. D. Lewis and M. Peacock	Bone	English	2012	22750015	RCT/qRCT	North America	3	323	66	Yes	Yes	Outpatient - hospital clinic		5	Healthy/Subclinical VDD	Primary school age, Adolescents	not stated	Both female/male	placebo	none/placebo	Daily	PO		12	0		Placebo	No			Yes	Immunoassay	Yes	No	25OHD	Phosphate, Bone mass marker, ALKP, Serum osteocalcin, urine N-telopeptide cross-links	Medium/Unclear	Unclear	Unclear	Unclear	Unclear	No	Yes	50 - 80 nmol/l	64	72
Bone turnover is not influenced by serum 25-hydroxyvitamin D in pubertal healthy black and white children	K. M. Hill, E. M. Laing, D. B. Hausman, A. Acton, B. R. Martin, G. P. McCabe, C. M. Weaver, R. D. Lewis and M. Peacock	Bone	English	2012	22750015	RCT/qRCT	North America	3	323	64	Yes	Yes	Outpatient - hospital clinic		5	Healthy/Subclinical VDD	Primary school age, Adolescents	not stated	Both female/male	Daily	Under RDA/AI	Daily	PO	D3	12	400		constant dose	No			Yes	Immunoassay	Yes	No	25OHD	Phosphate, Bone mass marker, ALKP, Serum osteocalcin, urine N-telopeptide cross-links	Medium/Unclear	Unclear	Unclear	Unclear	Unclear	No	Yes	50 - 80 nmol/l	64	72
Bone turnover is not influenced by serum 25-hydroxyvitamin D in pubertal healthy black and white children	K. M. Hill, E. M. Laing, D. B. Hausman, A. Acton, B. R. Martin, G. P. McCabe, C. M. Weaver, R. D. Lewis and M. Peacock	Bone	English	2012	22750015	RCT/qRCT	North America	3	323	65	Yes	Yes	Outpatient - hospital clinic		5	Healthy/Subclinical VDD	Primary school age, Adolescents	not stated	Both female/male	Daily	1000-3999	Daily	PO	D3	12	1000		constant dose	No			Yes	Immunoassay	Yes	No	25OHD	Phosphate, Bone mass marker, ALKP, Serum osteocalcin, urine N-telopeptide cross-links	Medium/Unclear	Unclear	Unclear	Unclear	Unclear	No	Yes	50 - 80 nmol/l	64	69.75
Bone turnover is not influenced by serum 25-hydroxyvitamin D in pubertal healthy black and white children	K. M. Hill, E. M. Laing, D. B. Hausman, A. Acton, B. R. Martin, G. P. McCabe, C. M. Weaver, R. D. Lewis and M. Peacock	Bone	English	2012	22750015	RCT/qRCT	North America	3	323	64	Yes	Yes	Outpatient - hospital clinic		5	Healthy/Subclinical VDD	Primary school age, Adolescents	not stated	Both female/male	Daily	1000-3999	Daily	PO	D3	12	2000		constant dose	No			Yes	Immunoassay	Yes	No	25OHD	Phosphate, Bone mass marker, ALKP, Serum osteocalcin, urine N-telopeptide cross-links	Medium/Unclear	Unclear	Unclear	Unclear	Unclear	No	Yes	50 - 80 nmol/l	63	66.375
Bone turnover is not influenced by serum 25-hydroxyvitamin D in pubertal healthy black and white children	K. M. Hill, E. M. Laing, D. B. Hausman, A. Acton, B. R. Martin, G. P. McCabe, C. M. Weaver, R. D. Lewis and M. Peacock	Bone	English	2012	22750015	RCT/qRCT	North America	3	323	64	Yes	Yes	Outpatient - hospital clinic		5	Healthy/Subclinical VDD	Primary school age, Adolescents	not stated	Both female/male	Daily	4000-39999	Daily	PO	D3	12	4000		constant dose	No			Yes	Immunoassay	Yes	No	25OHD	Phosphate, Bone mass marker, ALKP, Serum osteocalcin, urine N-telopeptide cross-links	Medium/Unclear	Unclear	Unclear	Unclear	Unclear	No	Yes	50 - 80 nmol/l	63	69.725
Clinical, biochemical and radiological manifestations of severe vitamin d deficiency in adolescents versus children: response to therapy	A. Soliman, S. De V, A. Adel, A. A. El and S. Bedair	Georgian Medical News	English	2012	23045422	Single arm	Middle East	1	45	45	Yes	Yes	Outpatient - hospital clinic		1	Healthy/Subclinical VDD	Infants, Toddlers	not stated	Both female/male	Intermittent	Above 40000	Single	IM	D3		600000	10000 IU/	Dose varies by age/weight/bsa	No			Yes	Immunoassay	Yes	Yes	25OHD, ALKP, Insulin like Growth Factor	Blood calcium, Urine calcium, Phosphate, Clinical Rickets, ALKP, PTH, Anthropometric measures	High	No	No	No	Yes	No	Unclear	< 50 nmol/l	45	16.75		7.25
Clinical, biochemical and radiological manifestations of severe vitamin d deficiency in adolescents versus children: response to therapy	A. Soliman, S. De V, A. Adel, A. A. El and S. Bedair	Georgian Medical News	English	2012	23045422	Single arm	Middle East	1	36	36	Yes	Yes	Outpatient - hospital clinic		1	Healthy/Subclinical VDD	Primary school age, Adolescents	not stated	Both female/male	Intermittent	Above 40000	Single	IM	D3		600000	10000 IU/	Dose varies by age/weight/bsa	No			Yes	Immunoassay	Yes	Yes	25OHD, ALKP, Insulin like Growth Factor	Blood calcium, Urine calcium, Phosphate, Clinical Rickets, ALKP, PTH, Anthropometric measures	High	No	No	No	Yes	No	Unclear	< 50 nmol/l	36	19.75		5.5
Effect of supplementation with cholecalciferol and calcium on 2-y bone mass accrual in HIV-infected children and adolescents: a randomized clinical trial	S. M. Arpadi, D. J. McMahon, E. J. Abrams, M. Bamji, M. Purswani, E. S. Engelson, M. Horlick and E. Shane	American Journal of Clinical Nutrition	English	2012	22258265	RCT/qRCT	North America	4	59	29	Yes	Yes	Outpatient - hospital clinic		2	HIV	Primary school age, Adolescents	not stated	Both female/male	placebo	none/placebo	q2 monthly	PO					Placebo	No			Yes	Not stated	No	No	Bone mass marker	25OHD, Blood calcium, Urine calcium	Medium/Unclear	Yes	Yes	Yes	Yes	No	Yes	50 - 80 nmol/l	29	58.75		5
Effect of supplementation with cholecalciferol and calcium on 2-y bone mass accrual in HIV-infected children and adolescents: a randomized clinical trial	S. M. Arpadi, D. J. McMahon, E. J. Abrams, M. Bamji, M. Purswani, E. S. Engelson, M. Horlick and E. Shane	American Journal of Clinical Nutrition	English	2012	22258265	RCT/qRCT	North America	4	59	30	Yes	Yes	Outpatient - hospital clinic		2	HIV	Primary school age, Adolescents	not stated	Both female/male	Intermittent	Above 40000	q2 monthly	PO	D3		100000		constant dose	Yes	1 g per day		Yes	Not stated	No	No	Bone mass marker	25OHD, Blood calcium, Urine calcium	Medium/Unclear	Yes	Yes	Yes	Yes	No	Yes	50 - 80 nmol/l	27	60.5
Effect of vitamin D supplementation of low birth weight term Indian infants from birth on cytokine production at 6 months.	G. Trilok-Kumar, H. Arora, M. Rajput, H. Chellani, V. Singh, J. Raynes, S. Arya, S. Aggarwal, N. Srivastava, H. P. Sachdev and S. Filteau.	European Journal of Clinical Nutrition	English	2012	22510791	RCT/qRCT	East Asia	1	2079	1039	Yes	Yes	Outpatient - hospital clinic		2	Premature and/or low birth weight	Neonate	0-2 days	Both female/male	Weekly	1000-3999	Weekly	PO	D3	25	1400		constant dose	No			Yes	Immunoassay	No	No	Immune/Inflammatory marker	25OHD	Low	Yes	Yes	Yes	Yes	Yes	Yes	Not measured/reported
Effect of vitamin D supplementation of low birth weight term Indian infants from birth on cytokine production at 6 months.	G. Trilok-Kumar, H. Arora, M. Rajput, H. Chellani, V. Singh, J. Raynes, S. Arya, S. Aggarwal, N. Srivastava, H. P. Sachdev and S. Filteau.	European Journal of Clinical Nutrition	English	2012	22510791	RCT/qRCT	East Asia	1	2079	1040	Yes	Yes	Outpatient - hospital clinic		2	Premature and/or low birth weight	Neonate	0-2 days	Both female/male	placebo	none/placebo	Weekly	PO		25			Placebo	No			Yes	Immunoassay	No	No	Immune/Inflammatory marker	25OHD	Low	Yes	Yes	Yes	Yes	Yes	Yes	Not measured/reported
Effect on the incidence of pneumonia of vitamin D supplementation by quarterly bolus dose to infants in Kabul: a randomised controlled superiority trial	S. Manaseki-Holland, Z. Maroof, J. Bruce, M. Z. Mughal, M. I. Masher, Z. A. Bhutta, G. Walraven and D. Chandramohan	Lancet	English	2012	22494826	RCT/qRCT	East Asia	1	3046	1522	Yes	Yes	Outpatient - hospital clinic		2	Healthy/Subclinical VDD	Infants	1-11 months	Both female/male	placebo	none/placebo	Quarterly	PO		52	0		Placebo	No			Yes	Immunoassay	No	No	Respiratory marker	25OHD, Anthropometric measures, Adverse effects, Clincal Pneumonia, Hospital admissions, Mortality	Low	Yes	Yes	Yes	Yes	Yes	Yes	Not measured/reported
Effect on the incidence of pneumonia of vitamin D supplementation by quarterly bolus dose to infants in Kabul: a randomised controlled superiority trial	S. Manaseki-Holland, Z. Maroof, J. Bruce, M. Z. Mughal, M. I. Masher, Z. A. Bhutta, G. Walraven and D. Chandramohan	Lancet	English	2012	22494826	RCT/qRCT	East Asia	1	3046	1524	Yes	Yes	Outpatient - hospital clinic		2	Healthy/Subclinical VDD	Infants	1-11 months	Both female/male	Intermittent	Above 40000	Quarterly	PO	D3	52	100000		constant dose	No			Yes	Immunoassay	No	No	Respiratory marker	25OHD, Anthropometric measures, Adverse effects, Clincal Pneumonia, Hospital admissions, Mortality	Low	Yes	Yes	Yes	Yes	Yes	Yes	Not measured/reported
Efficacy of fat-soluble vitamin supplementation in infants with biliary atresia.	L. Shneider, J. C. Magee, J. A. Bezerra, B. Haber, S. J. Karpen, T. Raghunathan, P. Rosenthal, K. Schwarz, F. J. Suchy, N. Kerkar, Y. Turmel	Pediatrics	English	2012	22891232	Single arm	North America	10	92	92	Yes	Yes	Outpatient - hospital clinic		1	Malabsorption, Biliary atresia	Neonate, Infants	0-6 months	Both female/male	Daily	RDA/AI to999	Daily	PO	D3	26	800		constant dose	No		Vitamin ADEKs, ± corticosteroid	Yes	Immunoassay	No	No	25OHD	Retinol binding protein, Retinol, alpha tocopherol, Lipid, Bilirubin.	High	No	No	Yes	Yes	Yes	Yes	Not measured/reported
Ergocalciferol supplementation in children with CKD delays the onset of secondary hyperparathyroidism: a randomized trial	R. Shroff, M. Wan, A. Gullett, S. Ledermann, R. Shute, C. Knott, D. Wells, H. Aitkenhead, B. Manickavasagar, H. W. van't and L. Rees	Clinical Journal of The American Society of Nephrol	English	2012	22266572	RCT/qRCT	Europe	1	49	24	Yes	Yes	Outpatient - hospital clinic		2	Renal disease	Neonate, Infants, Toddlers, Primary school age, Adolescents	0-17 years	Both female/male	Daily	4000-39999	Daily	PO	D2	13	8000	600-8000	Dose varies by response	No			Yes	LC/MS	Yes	No	PTH	25OHD , 125(OH)2D, Blood calcium, Phosphate, ALKP, Adverse effects	Medium/Unclear	Yes	Yes	Yes	Yes	No	Unclear	50 - 80 nmol/l	24	50.1		19.5
Ergocalciferol supplementation in children with CKD delays the onset of secondary hyperparathyroidism: a randomized trial	R. Shroff, M. Wan, A. Gullett, S. Ledermann, R. Shute, C. Knott, D. Wells, H. Aitkenhead, B. Manickavasagar, H. W. van't and L. Rees	Clinical Journal of The American Society of Nephrol	English	2012	22266572	RCT/qRCT	Europe	1	49	23	Yes	Yes	Outpatient - hospital clinic		2	Renal disease	Neonate, Infants, Toddlers, Primary school age, Adolescents	0-17 years	Both female/male	placebo	none/placebo	Daily	PO		13	0		Placebo	No			Yes	LC/MS	Yes	No	PTH	25OHD , 125(OH)2D, Blood calcium, Phosphate, ALKP, Adverse effects	Medium/Unclear	Yes	Yes	Yes	Yes	No	Unclear	50 - 80 nmol/l	23	52.1		17.3
High dose vitamin D therapy for chronic pain in children and adolescents with sickle cell disease: results of a randomized double blind pilot study	I. Osunkwo, T. R. Ziegler, J. Alvarez, C. McCracken, K. Cherry, C. E. Osunkwo, S. F. Ofori-Acquah, S. Ghosh, A. Ogunbobode, J. Rhodes, J. R.	British Journal of Haematology	English	2012	22924607	RCT/qRCT	North America		46	20	Yes	Yes			2	Other, Sickle cell	Primary school age, Adolescents	7-21 years	Both female/male	Weekly	Above 40000	Weekly	PO	D3	6	100000	40000 to	Dose varies by age/weight/bsa	Yes	500 mg/day		Yes	Immunoassay	Yes	No	Chronic pain	25OHD	Medium/Unclear	Unclear	Unclear	Unclear	Unclear	No	Yes	50 - 80 nmol/l	20	55.2		19
High dose vitamin D therapy for chronic pain in children and adolescents with sickle cell disease: results of a randomized double blind pilot study	I. Osunkwo, T. R. Ziegler, J. Alvarez, C. McCracken, K. Cherry, C. E. Osunkwo, S. F. Ofori-Acquah, S. Ghosh, A. Ogunbobode, J. Rhodes, J. R.	British Journal of Haematology	English	2012	22924607	RCT/qRCT	North America		46	19	Yes	Yes			2	Other, Sickle cell	Primary school age, Adolescents	7-21 years	Both female/male	Daily	Under RDA/AI	Daily	PO	D3	6	200		constant dose	Yes	500 mg/day		Yes	Immunoassay	Yes	No	Chronic pain	25OHD	Medium/Unclear	Unclear	Unclear	Unclear	Unclear	No	Yes	50 - 80 nmol/l	19	50.4		20.5
High-dose vitamin d intervention in infants--effects on vitamin d status, calcium homeostasis, and bone strength	E. Holmlund-Suila, H. Viljakainen, T. Hytinantti, C. Lamberg-Allardt, S. Andersson and O. MâˆšÂ§kitie	The Journal of Clinical Endocrinology and Metabolis	English	2012	22933541	RCT/qRCT	Europe	1	113	38	Yes	Yes	Outpatient - hospital clinic		3	Healthy/Subclinical VDD	Neonate	0-0 days	Both female/male	Daily	Under RDA/AI	Daily	PO	D3	10	400		constant dose	No			Yes	Immunoassay	Yes	Yes	25OHD	Blood calcium, Urine calcium, Phosphate, Bone mass marker, PTH, Anthropometric measures, Hematology, Immune/Inflammatory marker	Low	Yes	Yes	Yes	Yes	Yes	Yes	50 - 80 nmol/l	38	52		14
High-dose vitamin d intervention in infants--effects on vitamin d status, calcium homeostasis, and bone strength	E. Holmlund-Suila, H. Viljakainen, T. Hytinantti, C. Lamberg-Allardt, S. Andersson and O. MâˆšÂ§kitie	The Journal of Clinical Endocrinology and Metabolis	English	2012	22933541	RCT/qRCT	Europe	1	113	38	Yes	Yes	Outpatient - hospital clinic		3	Healthy/Subclinical VDD	Neonate	0-0 days	Both female/male	Daily	1000-3999	Daily	PO	D3	10	1200		constant dose	No			Yes	Immunoassay	Yes	Yes	25OHD	Blood calcium, Urine calcium, Phosphate, Bone mass marker, PTH, Anthropometric measures, Hematology, Immune/Inflammatory marker	Low	Yes	Yes	Yes	Yes	Yes	Yes	50 - 80 nmol/l	35	54		15
High-dose vitamin d intervention in infants--effects on vitamin d status, calcium homeostasis, and bone strength	E. Holmlund-Suila, H. Viljakainen, T. Hytinantti, C. Lamberg-Allardt, S. Andersson and O. MâˆšÂ§kitie	The Journal of Clinical Endocrinology and Metabolis	English	2012	22933541	RCT/qRCT	Europe	1	113	37	Yes	Yes	Outpatient - hospital clinic		3	Healthy/Subclinical VDD	Neonate	0-0 days	Both female/male	Daily	1000-3999	Daily	PO	D3	10	1600		constant dose	No			Yes	Immunoassay	Yes	Yes	25OHD	Blood calcium, Urine calcium, Phosphate, Bone mass marker, PTH, Anthropometric measures, Hematology, Immune/Inflammatory marker	Low	Yes	Yes	Yes	Yes	Yes	Yes	50 - 80 nmol/l	37	53		15
Intermittent high-dose vitamin D corrects vitamin D deficiency in adolescents: a pilot study	J. Carnes, S. Quinn, M. Nelson, G. Jones and T. Winzenberg	European Journal of Clinical Nutrition	English	2012	22190133	RCT/qRCT	Australia/New Zealand	1	22	8	Yes	No comment on consent process	School-based		3	Healthy/Subclinical VDD	Adolescents	15-17 years	Both female/male	placebo	none/placebo	q6 monthly	PO			0		Placebo	No			Yes	Immunoassay	Yes	No	25OHD	Blood calcium	Medium/Unclear	Unclear	Unclear	Yes	Yes	No	Yes	< 50 nmol/l	8	43.4		5.9
Intermittent high-dose vitamin D corrects vitamin D deficiency in adolescents: a pilot study	J. Carnes, S. Quinn, M. Nelson, G. Jones and T. Winzenberg	European Journal of Clinical Nutrition	English	2012	22190133	RCT/qRCT	Australia/New Zealand	1	22	7	Yes	No comment on consent process	School-based		3	Healthy/Subclinical VDD	Adolescents	15-17 years	Both female/male	Intermittent	Above 40000	q6 monthly	PO	D3		150000		constant dose	No			Yes	Immunoassay	Yes	No	25OHD	Blood calcium	Medium/Unclear	Unclear	Unclear	Yes	Yes	No	Yes	< 50 nmol/l	7	39.4		9.8
Intermittent high-dose vitamin D corrects vitamin D deficiency in adolescents: a pilot study	J. Carnes, S. Quinn, M. Nelson, G. Jones and T. Winzenberg	European Journal of Clinical Nutrition	English	2012	22190133	RCT/qRCT	Australia/New Zealand	1	22	7	Yes	No comment on consent process	School-based		3	Healthy/Subclinical VDD	Adolescents	15-17 years	Both female/male	Intermittent	Above 40000	q6 monthly	PO	D3		300000		constant dose	No			Yes	Immunoassay	Yes	No	25OHD	Blood calcium	Medium/Unclear	Unclear	Unclear	Yes	Yes	No	Yes	< 50 nmol/l	7	37.9		9.1
Oxidant/antioxidant system markers and trace element levels in children with nutritional rickets	M. Dogan, Y. Cesur, D. S. Zehra, S. Kaba, K. Bulan and M. Cemek	Journal of Pediatric Endocrinology & Metabolism	English	2012	23329760	Single arm	Middle East	1	30	30	Yes	Yes	Outpatient - hospital clinic		1	Rickets	Infants, Toddlers, Primary school age, Adolescents	0.25-15 yea	Both female/male	Intermittent	Above 40000	Single	IM	Unclear		300000		constant dose	No			Yes	LC/MS	Yes	No	Blood calcium, Immune/Inflammatory marker, Oxidative stress, Trace elements	25OHD, Phosphate, ALKP, PTH	High	No	No	No	Yes	Yes	Yes	< 50 nmol/l	30	16.25		6.25
Relationship of 25-hydroxyvitamin D and asthma control in children	E. Lewis, C. Fernandez, A. Nella, R. Hopp, J. C. Gallagher and T. B. Casale	Annals of Allergy, Asthma, & Immunology	English	2012	22469451	RCT/qRCT	North America	1	30	15	No comment on REB approval	No comment on consent process	Outpatient - hospital clinic		2	Asthma	Primary school age, Adolescents	6-17 years	Both female/male	Daily	1000-3999	Daily	PO	D3	52	1000		constant dose	No			Yes	Not stated	No	No	Respiratory marker	25OHD	Medium/Unclear	Unclear	Unclear	Unclear	Yes	Yes	Unclear	< 50 nmol/l	15	29.5
Relationship of 25-hydroxyvitamin D and asthma control in children	E. Lewis, C. Fernandez, A. Nella, R. Hopp, J. C. Gallagher and T. B. Casale	Annals of Allergy, Asthma, & Immunology	English	2012	22469451	RCT/qRCT	North America	1	30	15	No comment on REB approval	No comment on consent process	Outpatient - hospital clinic		2	Asthma	Primary school age, Adolescents	6-17 years	Both female/male	placebo	none/placebo	Daily	PO		52	0		Placebo	No			Yes	Not stated	No	No	Respiratory marker	25OHD	Medium/Unclear	Unclear	Unclear	Unclear	Yes	Yes	Unclear	< 50 nmol/l	15	35.75
Response to vitamin D3 supplementation in obese and non-obese Caucasian adolescents	R. A. Castaneda, N. Nader, A. Weaver, R. Singh, S. Kumar and C. R. Aguirre	Hormone Research In Paediatrics	English	2012	23128469	Single arm	North America	1	22	22	Yes	Yes			2	Healthy/Subclinical VDD	Primary school age, Adolescents	12-18 years	Both female/male	Daily	1000-3999	Daily	PO	D3	12	2000		constant dose	No			Yes	LC/MS	Yes	No	25OHD	Blood calcium, Phosphate, PTH, Anthropometric measures	High	No	No	No	Unclear	Yes	Yes	50 - 80 nmol/l	18	72.25		20.5
Response to vitamin D3 supplementation in obese and non-obese Caucasian adolescents	R. A. Castaneda, N. Nader, A. Weaver, R. Singh, S. Kumar and C. R. Aguirre	Hormone Research In Paediatrics	English	2012	23128469	Single arm	North America	1	27	27	Yes	Yes			2	Obesity	Primary school age, Adolescents	12-18 years	Both female/male	Daily	1000-3999	Daily	PO	D3	12	2000		constant dose	No			Yes	LC/MS	Yes	No	25OHD	Blood calcium, Phosphate, PTH, Anthropometric measures	High	No	No	No	Unclear	Yes	Yes	50 - 80 nmol/l	18	63		12.25
The effect of vitamin D therapy on hematological indices in children with vitamin D deficiency	A. T. Soliman, M. Eldabbagh, A. Elawwa, R. Ashour and W. Saleem	The Journal of Tropical Pediatrics	English	2012	22532054	Single arm	Middle East	1	40	40	No comment on REB approval	No comment on consent process			1	Healthy/Subclinical VDD	Toddlers, Primary school age	not stated	Both female/male	Intermittent	Above 40000	Single	IM	D3		600000	10000 IU/	Dose varies by age/weight/bsa	No			Yes	Not stated	No	No	Cardiovascular marker, Hematology, Immune/Inflammatory marker, CBC	25OHD, Vitals	High	No	No	No	Unclear	Unclear	Unclear	< 50 nmol/l	40	28		12
Therapy strategies in vitamin D deficiency with or without rickets: efficiency of low-dose stoss therapy	T. Emel, D. A. Ã¼. l. DoÆ’Ã¼an, G. n. l. Erdem and Ã±. Faruk	Journal of Pediatric Endocrinology & Metabolism	English	2012	22570958	Controlled non-randomized	Middle East	1	42	21	Yes	Yes	Outpatient - hospital clinic		2	Rickets	Infants, Toddlers	not stated	Both female/male	Daily	1000-3999	Daily	PO	D3	6	2000		constant dose	Yes	50 mg/kg/day		Yes	Immunoassay	Yes	Yes	25OHD	Blood calcium, Urine calcium, PTH	Medium/Unclear	Unclear	Unclear	No	Unclear	Yes	Unclear	< 50 nmol/l	21	34.25		12.25
Therapy strategies in vitamin D deficiency with or without rickets: efficiency of low-dose stoss therapy	T. Emel, D. A. Ã¼. l. DoÆ’Ã¼an, G. n. l. Erdem and Ã±. Faruk	Journal of Pediatric Endocrinology & Metabolism	English	2012	22570958	Controlled non-randomized	Middle East	1	42	21	Yes	Yes	Outpatient - hospital clinic		2	Rickets	Infants, Toddlers	not stated	Both female/male	Intermittent	Above 40000	Single	PO	D3		150000		constant dose	Yes	50 mg/kg/day		Yes	Immunoassay	Yes	Yes	25OHD	Blood calcium, Urine calcium, PTH	Medium/Unclear	Unclear	Unclear	No	Unclear	Yes	Unclear	< 50 nmol/l	21	36		12.75
Vitamin d supplementation for severe pneumonia a randomized controlled trial.	N. Choudhary and P. Gupta.	Indian pediatrics	English	2012	21992858	RCT/qRCT	East Asia	1	200	100	Yes	Yes	Inpatient - hospital		2	Pneumonia	Infants, Toddlers, Primary school age	2-60 months	Both female/male	Daily	1000-3999	Daily	PO	Unclear	0.7	2000	1000 (age	Dose varies by age/weight/bsa	No		Antibiotics	No		Yes	No	Respiratory marker	Adverse effects, Hospitalizations, Vitals	Low	Yes	Yes	Yes	Yes	Yes	Yes	Not measured/reported
Vitamin d supplementation for severe pneumonia a randomized controlled trial.	N. Choudhary and P. Gupta.	Indian pediatrics	English	2012	21992858	RCT/qRCT	East Asia	1	200	100	Yes	Yes	Inpatient - hospital		2	Pneumonia	Infants, Toddlers, Primary school age	2-60 months	Both female/male	placebo	none/placebo							Placebo	No		Lactulose (placebo), Antibiotics	No		Yes	No	Respiratory marker	Adverse effects, Hospitalizations, Vitals	Low	Yes	Yes	Yes	Yes	Yes	Yes	Not measured/reported
Vitamin D supplementation in infants with chronic congestive heart failure	S. A. Shedeed	Pediatric Cardiology	English	2012	22349668	RCT/qRCT	Middle East	1	80	42	Yes	Yes	Inpatient - hospital		2	Other, Congestive heart failure	Infants, Toddlers	not stated	Both female/male	Daily	1000-3999	Daily	PO	D3	12	1000		constant dose	No		Digoxin, Captopril, Spironolactone	Yes	Immunoassay	Yes	No	Immune/Inflammatory marker	25OHD, Blood calcium, Phosphate, PTH, Cardiovascular marker	Low	Yes	Yes	Yes	Yes	Yes	Unclear	< 50 nmol/l	42	33.5		5.525
Vitamin D supplementation in infants with chronic congestive heart failure	S. A. Shedeed	Pediatric Cardiology	English	2012	22349668	RCT/qRCT	Middle East	1	80	38	Yes	Yes	Inpatient - hospital		2	Other, Congestive heart failure	Infants, Toddlers	not stated	Both female/male	placebo	none/placebo	Daily	PO		12	0		Placebo	No		Digoxin, Captopril, Spironolactone	Yes	Immunoassay	Yes	No	Immune/Inflammatory marker	25OHD, Blood calcium, Phosphate, PTH, Cardiovascular marker	Low	Yes	Yes	Yes	Yes	Yes	Unclear	< 50 nmol/l	38	35		6.15
Vitamin D, tuberculin skin test conversion, and latent tuberculosis in Mongolian school-age children: a randomized, double-blind, placebo-controlled feasibility trial.	D. Ganmaa, E. Giovannucci, B. R. Bloom, W. Fawzi, W. Burr, D. Batbaatar, N. Sumberzul, M. F. Holick and W. C. Willett.	American Journal of Clinical Nutrition	English	2012	22760564	RCT/qRCT	East Asia	1	120	61	Yes	Yes	School-based		2	Healthy/Subclinical VDD	Primary school age, Adolescents	12-15 years	Both female/male	Daily	RDA/AI to999	Daily	PO	D3	26	800		constant dose	No			Yes	Immunoassay	No	No	Immune/Inflammatory marker	25OHD	Low	Yes	Yes	Yes	Yes	Yes	Yes	< 50 nmol/l	60	17.5		9
Vitamin D, tuberculin skin test conversion, and latent tuberculosis in Mongolian school-age children: a randomized, double-blind, placebo-controlled feasibility trial.	D. Ganmaa, E. Giovannucci, B. R. Bloom, W. Fawzi, W. Burr, D. Batbaatar, N. Sumberzul, M. F. Holick and W. C. Willett.	American Journal of Clinical Nutrition	English	2012	22760564	RCT/qRCT	East Asia	1	120	59	Yes	Yes	School-based		2	Healthy/Subclinical VDD	Primary school age, Adolescents	12-15 years	Both female/male	placebo	none/placebo	Daily	PO		26			Placebo	No			Yes	Immunoassay	No	No	Immune/Inflammatory marker	25OHD	Low	Yes	Yes	Yes	Yes	Yes	Yes	< 50 nmol/l	59	18.25		9.75
A randomized clinical trial of vitamin d supplementation in healthy adolescents	M. S. Putman, S. A. B. Pitts, C. E. Milliren, H. A. Feldman, K. Reinold and C. M. Gordon	Journal of Adolescent Health	English	2013	23608721	RCT/qRCT	North America	1	56	25	Yes	Yes	Outpatient - hospital clinic		2	Healthy/Subclinical VDD	Primary school age, Adolescents	11-19 years	Both female/male	Daily	Under RDA/AI	Daily	PO	D3	11	200		constant dose	No			Yes	Immunoassay	Yes	No	25OHD	Blood calcium, Phosphate, Bone mass marker, ALKP, PTH, Diabetes marker, Fasting glucose, Insulin	Medium/Unclear	Yes	Unclear	Yes	Yes	Yes	Yes	50 - 80 nmol/l	25	70.25		15.5
A randomized clinical trial of vitamin d supplementation in healthy adolescents	M. S. Putman, S. A. B. Pitts, C. E. Milliren, H. A. Feldman, K. Reinold and C. M. Gordon	Journal of Adolescent Health	English	2013	23608721	RCT/qRCT	North America	1	56	29	Yes	Yes	Outpatient - hospital clinic		2	Healthy/Subclinical VDD	Primary school age, Adolescents	11-19 years	Both female/male	Daily	1000-3999	Daily	PO	D3	11	1000		constant dose	No			Yes	Immunoassay	Yes	No	25OHD	Blood calcium, Phosphate, Bone mass marker, ALKP, PTH, Diabetes marker, Fasting glucose, Insulin	Medium/Unclear	Yes	Unclear	Yes	Yes	Yes	Yes	50 - 80 nmol/l	29	72.5		18.25
A Randomized Trial of Vitamin D3 Supplementation in Children: Dose-Response Effects on Vitamin D Metabolites and Calcium Absorption	R.D. Lewis, K.M. Laing	The Journal of Clinical Endocrinology and Metabolis	English	2013	24092833	RCT/qRCT	North America	3	323	66	Yes	Yes	Outpatient - hospital clinic		5	Healthy/Subclinical VDD	Primary school age, Adolescents	9-13 years	Both female/male	placebo	none/placebo	Daily	PO		12	0		Placebo	No			Yes	Immunoassay	Yes	Yes	25OHD	125(OH)2D, Blood calcium, Urine calcium, PTH, Calcium absorption	Low	Yes	Unclear	Yes	Yes	No	Yes	50 - 80 nmol/l	66	71.5		18.6
A Randomized Trial of Vitamin D3 Supplementation in Children: Dose-Response Effects on Vitamin D Metabolites and Calcium Absorption	R.D. Lewis, K.M. Laing	The Journal of Clinical Endocrinology and Metabolis	English	2013	24092833	RCT/qRCT	North America	3	323	64	Yes	Yes	Outpatient - hospital clinic		5	Healthy/Subclinical VDD	Primary school age, Adolescents	9-13 years	Both female/male	Daily	Under RDA/AI	Daily	PO	D3	12	400		constant dose	No			Yes	Immunoassay	Yes	Yes	25OHD	125(OH)2D, Blood calcium, Urine calcium, PTH, Calcium absorption	Low	Yes	Unclear	Yes	Yes	No	Yes	50 - 80 nmol/l	64	71.4		19.5
A Randomized Trial of Vitamin D3 Supplementation in Children: Dose-Response Effects on Vitamin D Metabolites and Calcium Absorption	R.D. Lewis, K.M. Laing	The Journal of Clinical Endocrinology and Metabolis	English	2013	24092833	RCT/qRCT	North America	3	323	65	Yes	Yes	Outpatient - hospital clinic		5	Healthy/Subclinical VDD	Primary school age, Adolescents	9-13 years	Both female/male	Daily	1000-3999	Daily	PO	D3	12	1000		constant dose	No			Yes	Immunoassay	Yes	Yes	25OHD	125(OH)2D, Blood calcium, Urine calcium, PTH, Calcium absorption	Low	Yes	Unclear	Yes	Yes	No	Yes	50 - 80 nmol/l	65	71.1		19.7
A Randomized Trial of Vitamin D3 Supplementation in Children: Dose-Response Effects on Vitamin D Metabolites and Calcium Absorption	R.D. Lewis, K.M. Laing	The Journal of Clinical Endocrinology and Metabolis	English	2013	24092833	RCT/qRCT	North America	3	323	64	Yes	Yes	Outpatient - hospital clinic		5	Healthy/Subclinical VDD	Primary school age, Adolescents	9-13 years	Both female/male	Daily	1000-3999	Daily	PO	D3	12	2000		constant dose	No			Yes	Immunoassay	Yes	Yes	25OHD	125(OH)2D, Blood calcium, Urine calcium, PTH, Calcium absorption	Low	Yes	Unclear	Yes	Yes	No	Yes	50 - 80 nmol/l	64	65.8		7.3
A Randomized Trial of Vitamin D3 Supplementation in Children: Dose-Response Effects on Vitamin D Metabolites and Calcium Absorption	R.D. Lewis, K.M. Laing	The Journal of Clinical Endocrinology and Metabolis	English	2013	24092833	RCT/qRCT	North America	3	323	64	Yes	Yes	Outpatient - hospital clinic		5	Healthy/Subclinical VDD	Primary school age, Adolescents	9-13 years	Both female/male	Daily	4000-39999	Daily	PO	D3	12	4000		constant dose	No			Yes	Immunoassay	Yes	Yes	25OHD	125(OH)2D, Blood calcium, Urine calcium, PTH, Calcium absorption	Low	Yes	Unclear	Yes	Yes	No	Yes	50 - 80 nmol/l	64	70		17.5
Correcting vitamin D insufficiency improves insulin sensitivity in obese adolescents: a randomized controlled trial	A. M. Belenchia, A. K. Tosh, L. S. Hillman and C. A. Peterson	American Journal of Clinical Nutrition	English	2013	23407306	RCT/qRCT	North America	1	49	21	Yes	Yes	Outpatient - hospital clinic		2	Obesity	Primary school age, Adolescents	9-19 years	Both female/male	Daily	4000-39999	Daily	PO	D3	24	4000		constant dose	No			Yes	Immunoassay	Yes	No	25OHD	Immune/Inflammatory marker	Low	Yes	Yes	Yes	Yes	Yes	Yes	< 50 nmol/l	21	48		15.75
Correcting vitamin D insufficiency improves insulin sensitivity in obese adolescents: a randomized controlled trial	A. M. Belenchia, A. K. Tosh, L. S. Hillman and C. A. Peterson	American Journal of Clinical Nutrition	English	2013	23407306	RCT/qRCT	North America	1	49	23	Yes	Yes	Outpatient - hospital clinic		2	Obesity	Primary school age, Adolescents	9-19 years	Both female/male	placebo	none/placebo	Daily	PO		24			Placebo	No			Yes	Immunoassay	Yes	No	25OHD	Immune/Inflammatory marker	Low	Yes	Yes	Yes	Yes	Yes	Yes	< 50 nmol/l	23	49		19.75
Effect of different dosages of oral vitamin D supplementation on vitamin D status in healthy, breastfed infants	S. Gallo, K. Comeau, C. Vanstone, S. Agellon, A. Sharma, G. Jones, M. L'AbbÃ©, A. Khamessan, C. Rodd, H. Weiler	The Journal of the American Medical Association	English	2013	23632722	RCT/qRCT	North America	1	132	39	Yes	Yes	Outpatient - hospital clinic		4	Healthy/Subclinical VDD	Neonate	0-1 months	Both female/male	Daily	Under RDA/AI	Daily	PO	D3	47.3	400		constant dose	No			Yes	LC/MS	Yes	Yes	25OHD	Blood calcium, Urine calcium, Phosphate, Bone mass marker, ALKP, Anthropometric measures	Low	Yes	Yes	Yes	Yes	No	Yes	50 - 80 nmol/l	35	55.7
Effect of different dosages of oral vitamin D supplementation on vitamin D status in healthy, breastfed infants	S. Gallo, K. Comeau, C. Vanstone, S. Agellon, A. Sharma, G. Jones, M. L'AbbÃ©, A. Khamessan, C. Rodd, H. Weiler	The Journal of the American Medical Association	English	2013	23632722	RCT/qRCT	North America	1	132	39	Yes	Yes	Outpatient - hospital clinic		4	Healthy/Subclinical VDD	Neonate	0-1 months	Both female/male	Daily	RDA/AI to999	Daily	PO	D3	47.3	800		constant dose	No			Yes	LC/MS	Yes	Yes	25OHD	Blood calcium, Urine calcium, Phosphate, Bone mass marker, ALKP, Anthropometric measures	Low	Yes	Yes	Yes	Yes	No	Yes	50 - 80 nmol/l	30	53.6
Effect of different dosages of oral vitamin D supplementation on vitamin D status in healthy, breastfed infants	S. Gallo, K. Comeau, C. Vanstone, S. Agellon, A. Sharma, G. Jones, M. L'AbbÃ©, A. Khamessan, C. Rodd, H. Weiler	The Journal of the American Medical Association	English	2013	23632722	RCT/qRCT	North America	1	132	38	Yes	Yes	Outpatient - hospital clinic		4	Healthy/Subclinical VDD	Neonate	0-1 months	Both female/male	Daily	1000-3999	Daily	PO	D3	47.3	1200		constant dose	No			Yes	LC/MS	Yes	Yes	25OHD	Blood calcium, Urine calcium, Phosphate, Bone mass marker, ALKP, Anthropometric measures	Low	Yes	Yes	Yes	Yes	No	Yes	50 - 80 nmol/l	29	64.5
Effect of different dosages of oral vitamin D supplementation on vitamin D status in healthy, breastfed infants	S. Gallo, K. Comeau, C. Vanstone, S. Agellon, A. Sharma, G. Jones, M. L'AbbÃ©, A. Khamessan, C. Rodd, H. Weiler	The Journal of the American Medical Association	English	2013	23632722	RCT/qRCT	North America	1	132	16	Yes	Yes	Outpatient - hospital clinic		4	Healthy/Subclinical VDD	Neonate	0-1 months	Both female/male	Daily	1000-3999	Daily	PO	D3	47.3	1600		constant dose	No			Yes	LC/MS	Yes	Yes	25OHD	Blood calcium, Urine calcium, Phosphate, Bone mass marker, ALKP, Anthropometric measures	Low	Yes	Yes	Yes	Yes	No	Yes	50 - 80 nmol/l	11	64
Effect of Vitamin D Supplementation on Moderate to Severe Bronchial Asthma.	Yadav M, Mittal K.	Indian J Pediatrics	English	2013	24193954	RCT/qRCT	East Asia	1	100	50	Yes	Yes	Outpatient - hospital clinic		2	Asthma	Toddlers, Primary school age, Adolescents	3-14 years	Both female/male	placebo	none/placebo	Monthly	PO		26			Placebo	No		Glucose (placebo)	No		No	No	Respiratory marker	Adverse effects, Clinical asthma, Emergency visits	Low	Unclear	Yes	Yes	Yes	Yes	Yes	Not measured/reported
Effect of Vitamin D Supplementation on Moderate to Severe Bronchial Asthma.	Yadav M, Mittal K.	Indian J Pediatrics	English	2013	24193954	RCT/qRCT	East Asia	1	100	50	Yes	Yes	Outpatient - hospital clinic		2	Asthma	Toddlers, Primary school age, Adolescents	3-14 years	Both female/male	Intermittent	Above 40000	Monthly	PO	D3	26	60000		constant dose	No			No		No	No	Respiratory marker	Adverse effects, Clinical asthma, Emergency visits	Low	Unclear	Yes	Yes	Yes	Yes	Yes	Not measured/reported
Effects of correction of vitamin D insufficiency on serum osteocalcin and glucose metabolism in obese children	P. Poomthavorn, P. Nantarakchaikul, et al.	Clinical Endocrinology	English	2013	24107003	Single arm	East Asia	1	72	72	Yes	Yes	Outpatient - hospital clinic		1	Obesity	Primary school age, Adolescents	6-18 years	Both female/male	Daily	4000-39999	Daily	PO	D2	4	20000		constant dose	No			Yes	LC/MS	No	No	Bone mass marker, Diabetes marker, Osteocalcin, Glucose metabolism	25OHD, PTH, Anthropometric measures, BMI	High	No	No	No	Yes	Yes	Yes	50 - 80 nmol/l	40	51.5		12.3
Effects of vitamin D supplementation on insulin resistance and cardiometabolic risk factors in children with metabolic syndrome: a triple-masked controlled trial	R. Kelishadi, S. Salek S, M. Salek M, M. Hashemipour, M. Movahedian	Jornal de Pediatria	English	2013	24140383	RCT/qRCT	Middle East	1	50	25	Yes	Yes	Outpatient - hospital clinic		2	Obesity	Primary school age, Adolescents	10-16 years	Both female/male	placebo	none/placebo	Weekly	PO		6	0		Placebo	No			Yes	Immunoassay	No	No	Diabetes marker, Insulin sensitivity/HOMA-IR	25OHD, Cardiovascular marker, BMI, Lipid profile	Low	Yes	Yes	Yes	Yes	Yes	Yes	< 50 nmol/l	22	44.775		5.675
Effects of vitamin D supplementation on insulin resistance and cardiometabolic risk factors in children with metabolic syndrome: a triple-masked controlled trial	R. Kelishadi, S. Salek S, M. Salek M, M. Hashemipour, M. Movahedian	Jornal de Pediatria	English	2013	24140383	RCT/qRCT	Middle East	1	50	25	Yes	Yes	Outpatient - hospital clinic		2	Obesity	Primary school age, Adolescents	10-16 years	Both female/male	Weekly	Above 40000	Weekly	PO	D3	6	50000		constant dose	No			Yes	Immunoassay	No	No	Diabetes marker, Insulin sensitivity/HOMA-IR	25OHD, Cardiovascular marker, BMI, Lipid profile	Low	Yes	Yes	Yes	Yes	Yes	Yes	< 50 nmol/l	21	45.675		5.1
Efficacy of vitamin D loading doses on serum 25-hydroxy vitamin D levels in school going adolescents: an open label, non-randomized prospective trial	M.K. Garg, R.K. Marwaha, R. Khadgawat, R. Ramot, A.K. Obroi, N. Mehan, N. Gupta, R. Madan	Journal of Pediatric Endocrinology & Metabolism	English	2013	23509211	Controlled non-randomized	East Asia	1	511	238	Yes	Yes	School-based		3	Healthy/Subclinical VDD	Primary school age, Adolescents	10-15 years	Both female/male	Weekly	Above 40000	Weekly	PO	D3	4	60000		constant dose	No			Yes	Immunoassay	Yes	Yes	25OHD	Blood calcium, Urine calcium, Phosphate, ALKP	Medium/Unclear	No	No	No	Yes	Yes	Unclear	< 50 nmol/l	214	21.8		11.3
Efficacy of vitamin D loading doses on serum 25-hydroxy vitamin D levels in school going adolescents: an open label, non-randomized prospective trial	M.K. Garg, R.K. Marwaha, R. Khadgawat, R. Ramot, A.K. Obroi, N. Mehan, N. Gupta, R. Madan	Journal of Pediatric Endocrinology & Metabolism	English	2013	23509211	Controlled non-randomized	East Asia	1	511	139	Yes	Yes	School-based		3	Healthy/Subclinical VDD	Primary school age, Adolescents	10-15 years	Both female/male	Weekly	Above 40000	Weekly	PO	D3	6	60000		constant dose	No			Yes	Immunoassay	Yes	Yes	25OHD	Blood calcium, Urine calcium, Phosphate, ALKP	Medium/Unclear	No	No	No	Yes	Yes	Unclear	< 50 nmol/l	136	17.5		7.5
Efficacy of vitamin D loading doses on serum 25-hydroxy vitamin D levels in school going adolescents: an open label, non-randomized prospective trial	M.K. Garg, R.K. Marwaha, R. Khadgawat, R. Ramot, A.K. Obroi, N. Mehan, N. Gupta, R. Madan	Journal of Pediatric Endocrinology & Metabolism	English	2013	23509211	Controlled non-randomized	East Asia	1	511	134	Yes	Yes	School-based		3	Healthy/Subclinical VDD	Primary school age, Adolescents	10-15 years	Both female/male	Weekly	Above 40000	Weekly	PO	D3	8	60000		constant dose	No			Yes	Immunoassay	Yes	Yes	25OHD	Blood calcium, Urine calcium, Phosphate, ALKP	Medium/Unclear	No	No	No	Yes	Yes	Unclear	< 50 nmol/l	132	32.5		14.3
Enhanced effect of zinc and calcium supplementation on bone status in growth hormone-deficient children treated with growth hormone: a pilot randomized controlled trial.	V. Ekbote, A. Khadilkar, S. Chiplonkar, Z. Mughal and V. Khadilkar.	Endocrine	English	2013	23224626	RCT/qRCT	East Asia	1	31	15	Yes	Yes	Outpatient - hospital clinic		2	Other, Growth hormone deficiency	Toddlers, Primary school age, Adolescents	not stated	Both female/male	Intermittent	Above 40000	q3 monthly	PO	D3		60000		constant dose	Yes	500 mg	rhGH	Yes	Immunoassay	Yes	No	Bone mass marker	25OHD, Blood calcium, PTH, IGF, Zn	Medium/Unclear	Unclear	Unclear	No	Yes	No	Unclear	< 50 nmol/l	15	24.69		12.32
Enhanced effect of zinc and calcium supplementation on bone status in growth hormone-deficient children treated with growth hormone: a pilot randomized controlled trial.	V. Ekbote, A. Khadilkar, S. Chiplonkar, Z. Mughal and V. Khadilkar.	Endocrine	English	2013	23224626	RCT/qRCT	East Asia	1	31	16	Yes	Yes	Outpatient - hospital clinic		2	Other, Growth hormone deficiency	Toddlers, Primary school age, Adolescents	not stated	Both female/male	Intermittent	Above 40000	q3 monthly	PO	D3		60000		constant dose	Yes	500 mg	Zn, rhGH	Yes	Immunoassay	Yes	No	Bone mass marker	25OHD, Blood calcium, PTH, IGF, Zn	Medium/Unclear	Unclear	Unclear	No	Yes	No	Unclear	< 50 nmol/l	16	18.2		8
Ergocalciferol decreases erythropoietin resistance in children with chronic kidney disease stage 5	P. Rianthavorn and P. Boonyapapong	Pediatric Nephrology	English	2013	23420502	RCT/qRCT	East Asia	1	20	10	Yes	Yes				Renal disease	Neonate, Infants, Toddlers, Primary school age, Adolescents	0-18 years	Both female/male	placebo	none/placebo	Weekly	PO		12	0		Placebo	No		Epoetin-alfa	Yes	Immunoassay	Yes	No	Renal marker, Dose of ESA	25OHD, Blood calcium, PTH	Medium/Unclear	Unclear	Unclear	No	Yes	Yes	Unclear	< 50 nmol/l	10	35.25		14
Ergocalciferol decreases erythropoietin resistance in children with chronic kidney disease stage 5	P. Rianthavorn and P. Boonyapapong	Pediatric Nephrology	English	2013	23420502	RCT/qRCT	East Asia	1	20	10	Yes	Yes				Renal disease	Neonate, Infants, Toddlers, Primary school age, Adolescents	0-18 years	Both female/male	Weekly	Above 40000	Weekly	PO	D2	12	40000	Severe 25	Dose varies by response	No		Epoetin-alfa	Yes	Immunoassay	Yes	No	Renal marker, Dose of ESA	25OHD, Blood calcium, PTH	Medium/Unclear	Unclear	Unclear	No	Yes	Yes	Unclear	< 50 nmol/l	10	37.75
Impact of vitamin D administration on immunogenicity of trivalent inactivated influenza vaccine in previously unvaccinated children	N. Principi, P. Marchisio	Human Vaccines & Immunotherapeutics	English	2013	23324599	RCT/qRCT	Europe	1	118	57	Yes	Yes	Outpatient - hospital clinic		2	Recurrent acute otitis media	Toddlers, Primary school age	2-5 years	Both female/male	placebo	none/placebo	Daily	PO		17	0		Placebo	No			Yes	Not stated	No	No	Immune/Inflammatory marker	25OHD, Adverse effects	Low	Unclear	Unclear	Yes	Yes	Yes	Yes	50 - 80 nmol/l	57	64.5		64.75
Impact of vitamin D administration on immunogenicity of trivalent inactivated influenza vaccine in previously unvaccinated children	N. Principi, P. Marchisio	Human Vaccines & Immunotherapeutics	English	2013	23324599	RCT/qRCT	Europe	1	118	59	Yes	Yes	Outpatient - hospital clinic		2	Recurrent acute otitis media	Toddlers, Primary school age	2-5 years	Both female/male	Daily	1000-3999	Daily	PO	D3	17	1000		constant dose	No			Yes	Not stated	No	No	Immune/Inflammatory marker	25OHD, Adverse effects	Low	Unclear	Unclear	Yes	Yes	Yes	Yes	50 - 80 nmol/l	59	68.5		65.5
Impact of vitamin D fortified milk supplementation on vitamin D status of healthy school children aged 10-14 years	R. Khadgawat, R. K. Marwaha, M. K. Garg, R. Ramot, A. K. Oberoi, V. Sreenivas, M. Gahlot, N. Mehan, P. Mathur and N. Gupta	Osteoporosis International	English	2013	23460234	RCT/qRCT	East Asia	3	796	255	Yes	Yes	School-based		3	Healthy/Subclinical VDD	Primary school age, Adolescents	10-14 years	Both female/male	placebo	none/placebo	Daily	PO		12	0		Placebo	No			Yes	Immunoassay	Yes	Yes	25OHD	Blood calcium, Urine calcium, Phosphate, ALKP, TSH	Low	Yes	Yes	Yes	Yes	Yes	Unclear	< 50 nmol/l	237	29.35		13.075
Impact of vitamin D fortified milk supplementation on vitamin D status of healthy school children aged 10-14 years	R. Khadgawat, R. K. Marwaha, M. K. Garg, R. Ramot, A. K. Oberoi, V. Sreenivas, M. Gahlot, N. Mehan, P. Mathur and N. Gupta	Osteoporosis International	English	2013	23460234	RCT/qRCT	East Asia	3	796	263	Yes	Yes	School-based		3	Healthy/Subclinical VDD	Primary school age, Adolescents	10-14 years	Both female/male	Daily	Under RDA/AI	Daily	PO	D3	12	600		constant dose	No			Yes	Immunoassay	Yes	Yes	25OHD	Blood calcium, Urine calcium, Phosphate, ALKP, TSH	Low	Yes	Yes	Yes	Yes	Yes	Unclear	< 50 nmol/l	243	28.55		13.1
Impact of vitamin D fortified milk supplementation on vitamin D status of healthy school children aged 10-14 years	R. Khadgawat, R. K. Marwaha, M. K. Garg, R. Ramot, A. K. Oberoi, V. Sreenivas, M. Gahlot, N. Mehan, P. Mathur and N. Gupta	Osteoporosis International	English	2013	23460234	RCT/qRCT	East Asia	3	796	258	Yes	Yes	School-based		3	Healthy/Subclinical VDD	Primary school age, Adolescents	10-14 years	Both female/male	Daily	1000-3999	Daily	PO	D3	12	1000		constant dose	No			Yes	Immunoassay	Yes	Yes	25OHD	Blood calcium, Urine calcium, Phosphate, ALKP, TSH	Low	Yes	Yes	Yes	Yes	Yes	Unclear	< 50 nmol/l	233	29.85		14.05
Is high-dose cholecalciferol justified in children with chronic kidney disease who failed low-dose maintenance therapy?	J. A. Kari, O. T. Baghdadi and S. El-Desoky	Pediatric Nephrology	English	2013	23338053	Single arm	Middle East	1	19	19	Yes	Yes	Outpatient - hospital clinic		1	Renal disease	Neonate	not stated	Both female/male	Intermittent	Above 40000	Single	IM	D3		300000		constant dose	No		a-Calcidiol, Calcium carbonate	Yes	Immunoassay	Yes	No	25OHD	Blood calcium, Phosphate, PTH	High	No	No	No	Yes	No	Unclear	< 50 nmol/l	19	36.02		19.057
Management of nutritional rickets in Indian children: a randomized controlled trial	V. Aggarwal, A. Seth, R. K. Marwaha, B. Sharma, P. Sonkar, S. Singh and S. Aneja	Journal of Tropical Pediatrics	English	2013	23104564	RCT/qRCT	East Asia	1	67	23	Yes	Yes	Outpatient - hospital clinic		3	Rickets	Infants, Toddlers, Primary school age	0.5-5 years	Both female/male	Intermittent	Above 40000	Single	IM	Unclear		600000		constant dose	No			Yes	Immunoassay	Yes	Yes	Clinical Rickets	25OHD, Blood calcium, Phosphate, Bone mass marker, ALKP, PTH	Medium/Unclear	Yes	Yes	No	Yes	No	Unclear	< 50 nmol/l	19	35.25		26.25
Management of nutritional rickets in Indian children: a randomized controlled trial	V. Aggarwal, A. Seth, R. K. Marwaha, B. Sharma, P. Sonkar, S. Singh and S. Aneja	Journal of Tropical Pediatrics	English	2013	23104564	RCT/qRCT	East Asia	1	67	22	Yes	Yes	Outpatient - hospital clinic		3	Rickets	Infants, Toddlers, Primary school age	0.5-5 years	Both female/male	Intermittent	Above 40000	Single	IM	Unclear		600000		constant dose	Yes	75 mg/kg per day (divided in 3 doses)		Yes	Immunoassay	Yes	Yes	Clinical Rickets	25OHD, Blood calcium, Phosphate, Bone mass marker, ALKP, PTH	Medium/Unclear	Yes	Yes	No	Yes	No	Unclear	< 50 nmol/l	20	48.5		44.75
Management of nutritional rickets in Indian children: a randomized controlled trial	V. Aggarwal, A. Seth, R. K. Marwaha, B. Sharma, P. Sonkar, S. Singh and S. Aneja	Journal of Tropical Pediatrics	English	2013	23104564	RCT/qRCT	East Asia	1	67	22	Yes	Yes	Outpatient - hospital clinic		3	Rickets	Infants, Toddlers, Primary school age	0.5-5 years	Both female/male	None	none/placebo							No drug, control arm	Yes	75 mg/kg/day (divided into 3 doses)		Yes	Immunoassay	Yes	Yes	Clinical Rickets	25OHD, Blood calcium, Phosphate, Bone mass marker, ALKP, PTH	Medium/Unclear	Yes	Yes	No	Yes	No	Unclear	< 50 nmol/l	17	36		14.25
Serum vitamin D levels in children with recurrent otitis media	A. Cayir, M. I. Turan, O. Ozkan, Y. Cayir, A. Kaya, S. Davutoglu and B. Ozkan	European Archives of Oto-Rhino-Laryngology	English	2013	23543299	Single arm	Middle East	1	84	84	Yes	Yes	Outpatient - hospital clinic		2	Recurrent acute otitis media	Toddlers, Primary school age	1-5 years	Both female/male	Daily	4000-39999	Daily	PO	D3	52	5000	5000 (25O	Dose varies by response	No		Amoxicillin, Clavulanate	Yes	Immunoassay	Yes	No	25OHD	PTH, Adverse effects, AOM attacks	High	No	No	No	Yes	No	Yes	< 50 nmol/l	84	28.5
Serum vitamin D levels in children with recurrent otitis media	A. Cayir, M. I. Turan, O. Ozkan, Y. Cayir, A. Kaya, S. Davutoglu and B. Ozkan	European Archives of Oto-Rhino-Laryngology	English	2013	23543299	Single arm	Middle East	1	108	109	Yes	Yes	Outpatient - hospital clinic		2	Healthy/Subclinical VDD	Toddlers, Primary school age	1-5 years	Both female/male	Daily	4000-39999	Daily	PO	D3	52	5000	5000 (25O	Dose varies by response	No		Amoxicillin, Clavulanate	Yes	Immunoassay	Yes	No	25OHD	PTH, Adverse effects, AOM attacks	High	No	No	No	Unclear	No	Yes	50 - 80 nmol/l	108	73
Single high-dose oral vitamin D3 (stoss) therapy--a solution to vitamin D deficiency in children with cystic fibrosis?	Darren Shepherd, Yvonne Belessis, Tamarah Katz, John Morton, Penny Field, Adam Jaffe	Journal of Cystic Fibrosis	English	2013	22998937	Single arm	Australia/New Zealand	1	42	42	Yes	Yes	Outpatient - hospital clinic		2	Cystic fibrosis	Toddlers, Primary school age, Adolescents	not stated	Both female/male	Intermittent	Above 40000	Single	PO	D3		600000	Depends o	Dose varies by age/weight/bsa	No			Yes	Immunoassay	Yes	No	25OHD	Blood calcium	High	No	No	No	Yes	Yes	Unclear	< 50 nmol/l	38	49.6		12.9
Supplementation with 1000 IU vitamin D/d leads to parathyroid hormone suppression, but not increased fractional calcium absorption, in 4-8-y-old children: a double-blind randomized controlled trial	S. A. Abrams, K. M. Hawthorne and Z. Chen	American Journal of Clinical Nutrition	English	2013	23151536	RCT/qRCT	North America	1	64	32	Yes	Yes	Outpatient - hospital clinic		2	Healthy/Subclinical VDD	Primary school age	4-9 years	Both female/male	placebo	none/placebo	Daily	PO		8			Placebo	No			Yes	Immunoassay	No	Yes	25OHD	Urine calcium, PTH, Adverse effects, Calcium absorption	Low	Yes	Yes	Yes	Yes	No	Yes	50 - 80 nmol/l	31	69		18.25
Supplementation with 1000 IU vitamin D/d leads to parathyroid hormone suppression, but not increased fractional calcium absorption, in 4-8-y-old children: a double-blind randomized controlled trial	S. A. Abrams, K. M. Hawthorne and Z. Chen	American Journal of Clinical Nutrition	English	2013	23151536	RCT/qRCT	North America	1	64	32	Yes	Yes	Outpatient - hospital clinic		2	Healthy/Subclinical VDD	Primary school age	4-9 years	Both female/male	Daily	1000-3999	Daily	PO	D2	8	1000		constant dose	No			Yes	Immunoassay	No	Yes	25OHD	Urine calcium, PTH, Adverse effects, Calcium absorption	Low	Yes	Yes	Yes	Yes	No	Yes	50 - 80 nmol/l	32	69.25		18.5
Vitamin D Supplementation Reduces the Risk of Acute Otitis Media in Otitis-prone Children	P. Marchisio P, D. Consonni	The Pediatric Infectious Disease Journal	English	2013	23694840	RCT/qRCT	Europe	1	116	58	Yes	Yes	Outpatient - hospital clinic		2	Recurrent acute otitis media	Toddlers, Primary school age	1-5 years	Both female/male	placebo	none/placebo	Daily	PO		17	0		Placebo	No			Yes	Immunoassay	No	No	Immune/Inflammatory marker, Clinical AOM	25OHD, Adverse effects	Low	Yes	Yes	Yes	Unclear	Yes	Yes	50 - 80 nmol/l	58	64.5
Vitamin D Supplementation Reduces the Risk of Acute Otitis Media in Otitis-prone Children	P. Marchisio P, D. Consonni	The Pediatric Infectious Disease Journal	English	2013	23694840	RCT/qRCT	Europe	1	116	58	Yes	Yes	Outpatient - hospital clinic		2	Recurrent acute otitis media	Toddlers, Primary school age	1-5 years	Both female/male	Daily	1000-3999	Daily	PO	D3	17	1000		constant dose	No			Yes	Immunoassay	No	No	Immune/Inflammatory marker, Clinical AOM	25OHD, Adverse effects	Low	Yes	Yes	Yes	Unclear	Yes	Yes	50 - 80 nmol/l	58	66.25
Vitamin D3 Supplementation and Childhood Diarrhea: A Randomized Controlled Trial	Aluisio AR, Maroof Z, Chandramohan D, Bruce J, Mughal MZ, Bhutta Z, Walraven G, Masher MI, Ensink JH, Manaseki-Holland S.	Pediatrics	English	2013	24019420	RCT/qRCT	East Asia	1	3046	1522	Yes	Yes	Outpatient - hospital clinic		2	Healthy/Subclinical VDD	Infants	1-11 months	Both female/male	placebo	none/placebo	Quarterly	PO		78			Placebo	No			Yes	Immunoassay	No	No	Adverse effects, Diarrhea	25OHD, Respiratory marker	Low	Yes	Yes	Yes	Yes	Yes	Yes	< 50 nmol/l		18.1
Vitamin D3 Supplementation and Childhood Diarrhea: A Randomized Controlled Trial	Aluisio AR, Maroof Z, Chandramohan D, Bruce J, Mughal MZ, Bhutta Z, Walraven G, Masher MI, Ensink JH, Manaseki-Holland S.	Pediatrics	English	2013	24019420	RCT/qRCT	East Asia	1	3046	1524	Yes	Yes	Outpatient - hospital clinic		2	Healthy/Subclinical VDD	Infants	1-11 months	Both female/male	Intermittent	Above 40000	Quarterly	PO	D3	78	100000		constant dose	No			Yes	Immunoassay	No	No	Adverse effects, Diarrhea	25OHD, Respiratory marker	Low	Yes	Yes	Yes	Yes	Yes	Yes	Not measured/reported
25-Hydroxyvitamin D concentrations in children with Crohn's disease supplemented with either 2000 or 400 IU daily for 6 months: a randomized controlled study	Kirstin E. Wingate, Kevan Jacobson, Robert Issenman, Matthew Carroll, Collin Barker, David Israel, Herbert Brill, Hope Weiler, Susan I. Barr	Journal of Pediatrics	English	2014	24423431	RCT/qRCT	North America	2	83	40	Yes	Yes	Outpatient - hospital clinic		2	Malabsorption, Crohn's disease	Primary school age, Adolescents	8-18 years	Both female/male	Daily	Under RDA/AI	Daily	PO	D3	26	400		constant dose	No		Multivitamins	Yes	Immunoassay	Yes	Yes	25OHD	Blood calcium, Urine calcium, Phosphate, Immune/Inflammatory marker, Clinical Crohn's (PCDAI: Pediatric Crohn's Disease Activity Index), ESR, C-reactive protein	Low	Yes	Yes	Yes	Yes	No	Yes	50 - 80 nmol/l	40	65		23
25-Hydroxyvitamin D concentrations in children with Crohn's disease supplemented with either 2000 or 400 IU daily for 6 months: a randomized controlled study	Kirstin E. Wingate, Kevan Jacobson, Robert Issenman, Matthew Carroll, Collin Barker, David Israel, Herbert Brill, Hope Weiler, Susan I. Barr	Journal of Pediatrics	English	2014	24423431	RCT/qRCT	North America	2	83	43	Yes	Yes	Outpatient - hospital clinic		2	Malabsorption, Crohn's disease	Primary school age, Adolescents	8-18 years	Both female/male	Daily	1000-3999	Daily	PO	D3	26	2000		constant dose	No		Multivitamins	Yes	Immunoassay	Yes	Yes	25OHD	Blood calcium, Urine calcium, Phosphate, Immune/Inflammatory marker, Clinical Crohn's (PCDAI: Pediatric Crohn's Disease Activity Index), ESR, C-reactive protein	Low	Yes	Yes	Yes	Yes	No	Yes	50 - 80 nmol/l	42	55		17
300,000 IU or 600,000 IU of oral vitamin D3 for treatment of nutritional rickets: a randomized controlled trial	HEMA MITTAL, SUNITA RAI, DHEERAJ SHAH, SV MADHU, GOPESH MEHROTRA, RAJEEV KUMAR MALHOTRA AND PIYUSH GUPTA	Indian Pediatrics	English	2014	24825262	RCT/qRCT	East Asia	1	106	38	Yes	Yes	Outpatient - hospital clinic		2	Rickets	Infants, Toddlers, Primary school age	0.5-6 years	Both female/male	Intermittent	Above 40000	Single	PO	D3		300000		constant dose	Yes	30-50 mg/kg/d		Yes	Immunoassay	Yes	Yes	25OHD	Blood calcium, Urine calcium, Clinical Rickets, PTH	Low	Yes	Yes	No	Yes	No	Yes	< 50 nmol/l	38	18.95
300,000 IU or 600,000 IU of oral vitamin D3 for treatment of nutritional rickets: a randomized controlled trial	HEMA MITTAL, SUNITA RAI, DHEERAJ SHAH, SV MADHU, GOPESH MEHROTRA, RAJEEV KUMAR MALHOTRA AND PIYUSH GUPTA	Indian Pediatrics	English	2014	24825262	RCT/qRCT	East Asia	1	106	38	Yes	Yes	Outpatient - hospital clinic		2	Rickets	Infants, Toddlers, Primary school age	0.5-6 years	Both female/male	Intermittent	Above 40000	Single	PO	D3		600000		constant dose	Yes	30-50 mg/kg/d		Yes	Immunoassay	Yes	Yes	25OHD	Blood calcium, Urine calcium, Clinical Rickets, PTH	Low	Yes	Yes	No	Yes	No	Yes	< 50 nmol/l	38	16.425
A Randomized controlled trial on safety and efficacy of single intramuscular versus staggered oral dose of 600 000IU Vitamin D in treatment of nutritional rickets	Krishanu Mondal, Anju Seth, Raman K. Marwaha, Dinesh Dhanwal, Satinder Aneja, Ritu Singh, and Pitambar Sonkar	Journal of Tropical Pediatrics	English	2014	24401754	RCT/qRCT	East Asia	1	71	37	Yes	Yes	Outpatient - hospital clinic		2	Rickets	Infants, Toddlers, Primary school age	0.5-5 years	Not specified	Intermittent	Above 40000	Single	IM	D3		600000		constant dose	Yes	50 mg/kg/day		Yes	Immunoassay	Yes	Yes	Clinical Rickets	25OHD, Blood calcium, Urine calcium	Low	Yes	Yes	No	Yes	Yes	Unclear	< 50 nmol/l	37	16.25		18.825
A Randomized controlled trial on safety and efficacy of single intramuscular versus staggered oral dose of 600 000IU Vitamin D in treatment of nutritional rickets	Krishanu Mondal, Anju Seth, Raman K. Marwaha, Dinesh Dhanwal, Satinder Aneja, Ritu Singh, and Pitambar Sonkar	Journal of Tropical Pediatrics	English	2014	24401754	RCT/qRCT	East Asia	1	71	34	Yes	Yes	Outpatient - hospital clinic		2	Rickets	Infants, Toddlers, Primary school age	0.5-5 years	Not specified	Weekly	Above 40000	Weekly	PO	D3	10	60000		constant dose	Yes	50 mg/kg/day		Yes	Immunoassay	Yes	Yes	Clinical Rickets	25OHD, Blood calcium, Urine calcium	Low	Yes	Yes	No	Yes	Yes	Unclear	< 50 nmol/l	30	16.275		26.975
Comparison of two regimens of vitamin D supplementation for vitamin D-deficient neonates	Mehrdad Shakiba, Ali Pahloosye, Mehrdad Mirouliaei, Zia Islami	Singapore Medical Journal	English	2014	24862751	Controlled non-randomized	Middle East	1	82	34	Yes	Yes	Outpatient - hospital clinic		2	Healthy/Subclinical VDD	Neonate	0-15 days	Both female/male	Intermittent	4000-39999	Monthly	PO	D3	17.3	30000	30000	Dose varies by response	No			Yes	Immunoassay	No	No	25OHD		High	No	No	No	Yes	No	Unclear	< 50 nmol/l	34
Comparison of two regimens of vitamin D supplementation for vitamin D-deficient neonates	Mehrdad Shakiba, Ali Pahloosye, Mehrdad Mirouliaei, Zia Islami	Singapore Medical Journal	English	2014	24862751	Controlled non-randomized	Middle East	1	82	48	Yes	Yes	Outpatient - hospital clinic		2	Healthy/Subclinical VDD	Neonate	0-15 days	Both female/male	Daily	Under RDA/AI	Daily	PO	D3	17.3	400		constant dose	No			Yes	Immunoassay	No	No	25OHD		High	No	No	No	Yes	No	Unclear	Not measured/reported
Effect of vitamin D3 supplementation on serum 25(OH)D, lipids and markers of insulin resistance in obese adolescents: a prospective, randomized, placebo-controlled pilot trial	Nader NS, Aguirre Castaneda R, Wallace J, Singh R, Weaver A, Kumar S.	Hormone research in pdiatrics	English	2014	25034315	RCT/qRCT	North America	2	58	30	Yes	Yes	Outpatient - hospital clinic		2	Obesity	Primary school age, Adolescents	12-18 years	Both female/male	placebo	none/placebo	Daily			12			Placebo	No			Yes	LC/MS	Yes	No	25OHD	Blood calcium, PTH, Cardiovascular marker, Immune/Inflammatory marker	Low	Yes	Yes	Yes	Yes	Yes	Yes	50 - 80 nmol/l	24		5
Effect of vitamin D3 supplementation on serum 25(OH)D, lipids and markers of insulin resistance in obese adolescents: a prospective, randomized, placebo-controlled pilot trial	Nader NS, Aguirre Castaneda R, Wallace J, Singh R, Weaver A, Kumar S.	Hormone research in pdiatrics	English	2014	25034315	RCT/qRCT	North America	2	58	28	Yes	Yes	Outpatient - hospital clinic		2	Obesity	Primary school age, Adolescents	12-18 years	Both female/male	Daily	1000-3999	Daily	PO	D3	12	2000		constant dose	No			Yes	LC/MS	Yes	No	25OHD	Blood calcium, PTH, Cardiovascular marker, Immune/Inflammatory marker	Low	Yes	Yes	Yes	Yes	Yes	Yes	50 - 80 nmol/l	20		6
Maintenance of optimal vitamin D status in children and adolescents with inflammatory bowel disease: a randomized clinical trial comparing two regimens	Helen M. Pappa, Paul D. Mitchell, Hongyu Jiang, Sivan Kassiff, Rajna Filip-Dhima, Diane DiFabio, Nicolle Quinn, Rachel C. Lawton, M. E. S. B	Journal of Clinical Endocrinology & Metabolism	English	2014	24926949	RCT/qRCT	North America	1	63	32	Yes	Yes	Outpatient - hospital clinic		2	Malabsorption, Inflammatory bowel diseas	Primary school age, Adolescents	5-21 years	Both female/male	Daily	Under RDA/AI	Daily	PO	D2	52	400		constant dose	Yes	800-1200 mg/day		Yes	Immunoassay	Yes	Yes	25OHD	Blood calcium, Urine calcium, Phosphate, PTH, Immune/Inflammatory marker, IL6, CRP, ESR, Clinical Crohn's disease (Paediatric Crohn's Disease Activity Index PCDAI), Clinical Ulcerative Colitis (Paedia	Low	Yes	Yes	No	Yes	Yes	Yes	50 - 80 nmol/l	32	70
Maintenance of optimal vitamin D status in children and adolescents with inflammatory bowel disease: a randomized clinical trial comparing two regimens	Helen M. Pappa, Paul D. Mitchell, Hongyu Jiang, Sivan Kassiff, Rajna Filip-Dhima, Diane DiFabio, Nicolle Quinn, Rachel C. Lawton, M. E. S. B	Journal of Clinical Endocrinology & Metabolism	English	2014	24926949	RCT/qRCT	North America	1	63	31	Yes	Yes	Outpatient - hospital clinic		2	Malabsorption, Inflammatory bowel diseas	Primary school age, Adolescents	5-21 years	Both female/male	Daily	1000-3999	Daily	PO	D2	52	2000	1000 IU i	Dose varies by vitamin D stat	Yes	800-1200 mg/day		Yes	Immunoassay	Yes	Yes	25OHD	Blood calcium, Urine calcium, Phosphate, PTH, Immune/Inflammatory marker, IL6, CRP, ESR, Clinical Crohn's disease (Paediatric Crohn's Disease Activity Index PCDAI), Clinical Ulcerative Colitis (Paedia	Low	Yes	Yes	No	Yes	Yes	Yes	> 80 nmol/l	31	82.5
Prophylactic effect of low dose vitamin D in osteopenia of prematurity: a clinical trial study	Peymaneh Alizadeh Taheri, Negar Sajjadian, Bahram Beyrami, and Mamak Shariat	Acta Medica Iranica	English	2014	25325204	RCT/qRCT	Middle East	1	60	30	Yes	Yes	Other	Combined inpatient-outpa	2	Premature and/or low birth weight	Neonate	0-0 days	Not specified	Daily	RDA/AI to999	Daily	PO	D3	6	200		constant dose	Yes	90-120 mg/kg/d	Phosphate sandose, Premature formula (Prenon)	Yes	Immunoassay	Yes	No	Clinical Rickets	25OHD, Blood calcium, Bone mass marker	Medium/Unclear	Yes	Unclear	No	Yes	Yes	Unclear	Not measured/reported
Prophylactic effect of low dose vitamin D in osteopenia of prematurity: a clinical trial study	Peymaneh Alizadeh Taheri, Negar Sajjadian, Bahram Beyrami, and Mamak Shariat	Acta Medica Iranica	English	2014	25325204	RCT/qRCT	Middle East	1	60	30	Yes	Yes	Other	Combined inpatient-outpa	2	Premature and/or low birth weight	Neonate	0-0 days	Not specified	Daily	RDA/AI to999	Daily	PO	D3	6	400		constant dose	Yes	90-120 mg/kg/d	Phosphate sandose, Premature formula (Prenon)	Yes	Immunoassay	Yes	No	Clinical Rickets	25OHD, Blood calcium, Bone mass marker	Medium/Unclear	Yes	Unclear	No	Yes	Yes	Unclear	Not measured/reported
Randomized trial of vitamin D supplementation for winter-related atopic dermatitis in children	Camargo CA Jr, Ganmaa D, Sidbury R, Erdenedelger Kh, Radnaakhand N, Khandsuren B	Journal of Allergy & Clinical Immunology	English	2014	25282565	RCT/qRCT	East Asia	9	107	49	Yes	No comment on consent process	Outpatient - hospital clinic		2	Other, Atopic dermatitis	Toddlers, Primary school age, Adolescents	2-17 years	Both female/male	placebo	none/placebo		PO					Placebo	No			No		No	No	Clinical Atopic Dermatitis (EASI score, and Investigator's Global Assessment)	Parental assessment of improvement	Medium/Unclear	Yes	Yes	Yes	Yes	Yes	Yes	Not measured/reported
Randomized trial of vitamin D supplementation for winter-related atopic dermatitis in children	Camargo CA Jr, Ganmaa D, Sidbury R, Erdenedelger Kh, Radnaakhand N, Khandsuren B	Journal of Allergy & Clinical Immunology	English	2014	25282565	RCT/qRCT	East Asia	9	107	58	Yes	No comment on consent process	Outpatient - hospital clinic		2	Other, Atopic dermatitis	Toddlers, Primary school age, Adolescents	2-17 years	Both female/male	Daily	1000-3999	Daily	PO	D3	4.3	1000		constant dose	No			No		No	No	Clinical Atopic Dermatitis (EASI score, and Investigator's Global Assessment)	Parental assessment of improvement	Medium/Unclear	Yes	Yes	Yes	Yes	Yes	Yes	Not measured/reported
Trial of daily vitamin D supplementation in preterm infants	Chandra Kumar Natarajan, M. Jeeva Sankar, Ramesh Agarwal, O. Tejo Pratap, Vandana Jain, Nandita Gupta, Arun Kumar Gupta, Ashok K. Deorari, V	Pediatrics	English	2014	24515510	RCT/qRCT	East Asia	1	96	48	Yes	Yes	Outpatient - hospital clinic		2	Premature and/or low birth weight	Neonate	0-14 days	Both female/male	Daily	RDA/AI to999	Daily	PO	D3	13	800		constant dose	No			Yes	Immunoassay	Yes	Yes	25OHD	Blood calcium, Urine calcium, Phosphate, Bone mass marker, ALKP, PTH	Low	Yes	Yes	Yes	Yes	Yes	Yes	< 50 nmol/l	48
Trial of daily vitamin D supplementation in preterm infants	Chandra Kumar Natarajan, M. Jeeva Sankar, Ramesh Agarwal, O. Tejo Pratap, Vandana Jain, Nandita Gupta, Arun Kumar Gupta, Ashok K. Deorari, V	Pediatrics	English	2014	24515510	RCT/qRCT	East Asia	1	96	48	Yes	Yes	Outpatient - hospital clinic		2	Premature and/or low birth weight	Neonate	0-14 days	Both female/male	Daily	RDA/AI to999	Daily	PO	D3	13	400		constant dose	No			Yes	Immunoassay	Yes	Yes	25OHD	Blood calcium, Urine calcium, Phosphate, Bone mass marker, ALKP, PTH	Low	Yes	Yes	Yes	Yes	Yes	Yes	< 50 nmol/l	48
Vitamin D as an adjunct to subcutaneous allergen immunotherapy in asthmatic children sensitized to house dust mite.	Baris S, Kiykim A, Ozen A.	Allergy	English	2014	24180595	RCT/qRCT	Middle East	1	55	18	Yes	Yes	Outpatient - hospital clinic		3	Asthma	Primary school age, Adolescents	5-15 years	Both female/male	Daily	RDA/AI to999	Daily	PO	D3	52	650		constant dose	No		Subcutaneous allergen immunotherapy	Yes	LC/MS	Yes	Yes	Respiratory marker	25OHD, Blood calcium, Urine calcium, PTH, Immune/Inflammatory marker, Clinical asthma	Low	Yes	Yes	No	Yes	Yes	Yes	< 50 nmol/l	17	47.5		22.5
Vitamin D as an adjunct to subcutaneous allergen immunotherapy in asthmatic children sensitized to house dust mite.	Baris S, Kiykim A, Ozen A.	Allergy	English	2014	24180595	RCT/qRCT	Middle East	1	55	17	Yes	Yes	Outpatient - hospital clinic		3	Asthma	Primary school age, Adolescents	5-15 years	Both female/male	placebo	none/placebo	Daily			52			Placebo	No		Subcutaneous allergen immunotherapy	Yes	LC/MS	Yes	Yes	Respiratory marker	25OHD, Blood calcium, Urine calcium, PTH, Immune/Inflammatory marker, Clinical asthma	Low	Yes	Yes	No	Yes	Yes	Yes	50 - 80 nmol/l	15	50		30
Vitamin D as an adjunct to subcutaneous allergen immunotherapy in asthmatic children sensitized to house dust mite.	Baris S, Kiykim A, Ozen A.	Allergy	English	2014	24180595	RCT/qRCT	Middle East	1	55	20	Yes	Yes	Outpatient - hospital clinic		3	Asthma	Primary school age, Adolescents	5-15 years	Both female/male	placebo	none/placebo	Daily	PO		52			Placebo	No		Asthma pharmacotherapy	Yes	LC/MS	Yes	Yes	Respiratory marker	25OHD, Blood calcium, Urine calcium, PTH, Immune/Inflammatory marker, Clinical asthma	Low	Yes	Yes	No	Yes	Yes	Yes	< 50 nmol/l	18	40		20
Vitamin d during pregnancy and infancy and infant serum 25-hydroxyvitamin d concentration.	Grant CC, Stewart A, Scragg R et al.	Pediatrics	English	2014	24344104	RCT/qRCT	Australia/New Zealand	1	259	87	Yes	Yes	Outpatient - hospital clinic		3	Healthy/Subclinical VDD	Neonate	0-0 days	Both female/male	placebo	none/placebo	Daily	PO		26			Placebo	No			Yes	LC/MS	Yes	No	25OHD	Blood calcium	Low	Yes	Yes	Yes	Yes	Yes	Yes	< 50 nmol/l	63		3
Vitamin d during pregnancy and infancy and infant serum 25-hydroxyvitamin d concentration.	Grant CC, Stewart A, Scragg R et al.	Pediatrics	English	2014	24344104	RCT/qRCT	Australia/New Zealand	1	259	87	Yes	Yes	Outpatient - hospital clinic		3	Healthy/Subclinical VDD	Neonate	0-0 days	Both female/male	Daily	Under RDA/AI	Daily	PO	D3	26	400		constant dose	No			Yes	LC/MS	Yes	No	25OHD	Blood calcium	Low	Yes	Yes	Yes	Yes	Yes	Yes	50 - 80 nmol/l	74		6
Vitamin d during pregnancy and infancy and infant serum 25-hydroxyvitamin d concentration.	Grant CC, Stewart A, Scragg R et al.	Pediatrics	English	2014	24344104	RCT/qRCT	Australia/New Zealand	1	259	85	Yes	Yes	Outpatient - hospital clinic		3	Healthy/Subclinical VDD	Neonate	0-0 days	Both female/male	Daily	RDA/AI to999	Daily	PO	D3	26	800		constant dose	No			Yes	LC/MS	Yes	No	25OHD	Blood calcium	Low	Yes	Yes	Yes	Yes	Yes	Yes	50 - 80 nmol/l	63		6
Vitamin D status and adequacy of standard supplementation in preterm neonates from South India	Mintoo Tergestina, Arun Jose, ô°†Santhanam Sridhar, Victoria Job, Grace Rebekah, ô°†Kurien A. Kuruvilla, and ô°†Niranjan Thomas	Journal of Pediatric Gastroenterology & Nutrition	English	2014	24792631	Single arm	East Asia	1	111	90	Yes	Yes	Inpatient - hospital		1	Premature and/or low birth weight	Neonate	0-0 days	Both female/male	Daily	RDA/AI to999	Daily	PO	D3	6	400		constant dose	Yes	100 mg, q8h	Phosphate	Yes	Immunoassay	Yes	No	25OHD	Blood calcium, PTH	High	No	No	No	Yes	Yes	Yes	> 80 nmol/l	111		8
Vitamin D supplementation of breastfed infants: a randomized dose-response trial	Ekhard E. Ziegler, Steven E. Nelson, and Janice M. Jeter	Pediatric Research	English	2014	24858141	RCT/qRCT	North America	1	213	56	Yes	Yes	Outpatient - hospital clinic		4	Healthy/Subclinical VDD	Neonate	28-28 days	Both female/male	Daily	Under RDA/AI	Daily	PO	D3	52	200		constant dose	No			Yes	Immunoassay	Yes	No	25OHD	Blood calcium, PTH	Low	Yes	Yes	Yes	Yes	Yes	Yes	< 50 nmol/l	56	35.1		18.7
Vitamin D supplementation of breastfed infants: a randomized dose-response trial	Ekhard E. Ziegler, Steven E. Nelson, and Janice M. Jeter	Pediatric Research	English	2014	24858141	RCT/qRCT	North America	1	213	60	Yes	Yes	Outpatient - hospital clinic		4	Healthy/Subclinical VDD	Neonate	28-28 days	Both female/male	Daily	Under RDA/AI	Daily	PO	D3	52	400		constant dose	No			Yes	Immunoassay	Yes	No	25OHD	Blood calcium, PTH	Low	Yes	Yes	Yes	Yes	Yes	Yes	< 50 nmol/l	60	42.2		18.6
Vitamin D supplementation of breastfed infants: a randomized dose-response trial	Ekhard E. Ziegler, Steven E. Nelson, and Janice M. Jeter	Pediatric Research	English	2014	24858141	RCT/qRCT	North America	1	213	56	Yes	Yes	Outpatient - hospital clinic		4	Healthy/Subclinical VDD	Neonate	28-28 days	Both female/male	Daily	RDA/AI to999	Daily	PO	D3	52	600		constant dose	No			Yes	Immunoassay	Yes	No	25OHD	Blood calcium, PTH	Low	Yes	Yes	Yes	Yes	Yes	Yes	< 50 nmol/l	56	43.4		21
Vitamin D supplementation of breastfed infants: a randomized dose-response trial	Ekhard E. Ziegler, Steven E. Nelson, and Janice M. Jeter	Pediatric Research	English	2014	24858141	RCT/qRCT	North America	1	213	41	Yes	Yes	Outpatient - hospital clinic		4	Healthy/Subclinical VDD	Neonate	28-28 days	Both female/male	Daily	RDA/AI to999	Daily	PO	D3	52	800		constant dose	No			Yes	Immunoassay	Yes	No	25OHD	Blood calcium, PTH	Low	Yes	Yes	Yes	Yes	Yes	Yes	< 50 nmol/l	41	44.2		19.8
Vitamin D treatment in calcium-deficiency rickets: a randomised controlled trial	Tom D Thacher, Philip R Fischer, John M Pettifor	Archives of Disease in Childhood	English	2014	24748637	RCT/qRCT	Africa	1	72	44	Yes	Yes	Outpatient - hospital clinic		2	Rickets	Toddlers, Primary school age	not stated	Both female/male	Intermittent	Above 40000	Monthly	PO	D2	24	50000		constant dose	Yes	938 mg, q12h		Yes	LC/MS	Yes	No	ALKP	25OHD, Blood calcium, Clinical Rickets, Bone mass marker	Low	Yes	No	Yes	Yes	Yes	Yes	< 50 nmol/l	44		2
Vitamin D treatment in calcium-deficiency rickets: a randomised controlled trial	Tom D Thacher, Philip R Fischer, John M Pettifor	Archives of Disease in Childhood	English	2014	24748637	RCT/qRCT	Africa	1	72	28	Yes	Yes	Outpatient - hospital clinic		2	Rickets	Toddlers, Primary school age	not stated	Both female/male	placebo	none/placebo	Monthly	PO		24			Placebo	Yes	938 mg, q12h	Vitamin B (Placebo)	Yes	LC/MS	Yes	No	ALKP	25OHD, Blood calcium, Clinical Rickets, Bone mass marker	Low	Yes	No	Yes	Yes	Yes	Yes	< 50 nmol/l	28		3
Vitamin D3 dose requirement to raise 25-hydroxyvitamin D to desirable levels in adolescents: results from a randomized controlled trial	Laila Al-Shaar, Rania Mneimneh, Mona Nabulsi, Joyce Maalouf, and Ghada Elâ€Hajj Fuleihan	Journal of Bone & Mineral Research	English	2014	24123134	RCT/qRCT	Middle East	1	363	119	Yes	Yes	School-based		3	Healthy/Subclinical VDD	Primary school age, Adolescents	10-17 years	Both female/male	placebo	none/placebo	Weekly	PO		52			Placebo	No			Yes	Immunoassay	Yes	No	25OHD		Low	Yes	Yes	Yes	Yes	Yes	Unclear	< 50 nmol/l	111	38.5		17
Vitamin D3 dose requirement to raise 25-hydroxyvitamin D to desirable levels in adolescents: results from a randomized controlled trial	Laila Al-Shaar, Rania Mneimneh, Mona Nabulsi, Joyce Maalouf, and Ghada Elâ€Hajj Fuleihan	Journal of Bone & Mineral Research	English	2014	24123134	RCT/qRCT	Middle East	1	363	121	Yes	Yes	School-based		3	Healthy/Subclinical VDD	Primary school age, Adolescents	10-17 years	Both female/male	Weekly	1000-3999	Weekly	PO	D3	52	1400		constant dose	No			Yes	Immunoassay	Yes	No	25OHD		Low	Yes	Yes	Yes	Yes	Yes	Unclear	< 50 nmol/l	112	38		21
Vitamin D3 dose requirement to raise 25-hydroxyvitamin D to desirable levels in adolescents: results from a randomized controlled trial	Laila Al-Shaar, Rania Mneimneh, Mona Nabulsi, Joyce Maalouf, and Ghada Elâ€Hajj Fuleihan	Journal of Bone & Mineral Research	English	2014	24123134	RCT/qRCT	Middle East	1	363	115	Yes	Yes	School-based		3	Healthy/Subclinical VDD	Primary school age, Adolescents	10-17 years	Both female/male	Weekly	4000-39999	Weekly	PO	D3	52	14000		constant dose	No			Yes	Immunoassay	Yes	No	25OHD		Low	Yes	Yes	Yes	Yes	Yes	Unclear	< 50 nmol/l	113	38.25		17.5
Cholecalciferol Supplementation Does Not Influence beta-Cell Function and Insulin Action in Obese Adolescents: A Prospective Double-Blind Randomized Trial	Asma Javed, Adrian Vella, P Babu Balagopal, Philip R Fischer, Amy L Weaver, Francesca Piccinini, Chiara Dalla Man, Claudio Cobelli, Paula D	Journal of Nutrition	English	2015	25644349	RCT/qRCT	North America	1	51	25	Yes	Yes	Outpatient - hospital clinic		2	Obesity	Primary school age, Adolescents	12-18 years	Both female/male	Daily	Under RDA/AI	Daily	PO	D3	12	400		constant dose	No			Yes	LC/MS	No	No	Diabetes marker	25OHD, Anthropometric measures, Cardiovascular marker, Glucose, Insulin, OGTT, HOMA-IR, QUICKI, Si, ISR, BMI, Lipid profiles	Low	Yes	Yes	Yes	Yes	Yes	Yes	50 - 80 nmol/l	23	61		19.25
Cholecalciferol Supplementation Does Not Influence beta-Cell Function and Insulin Action in Obese Adolescents: A Prospective Double-Blind Randomized Trial	Asma Javed, Adrian Vella, P Babu Balagopal, Philip R Fischer, Amy L Weaver, Francesca Piccinini, Chiara Dalla Man, Claudio Cobelli, Paula D	Journal of Nutrition	English	2015	25644349	RCT/qRCT	North America	1	51	26	Yes	Yes	Outpatient - hospital clinic		2	Obesity	Primary school age, Adolescents	12-18 years	Both female/male	Daily	1000-3999	Daily	PO	D3	12	2000		constant dose	No			Yes	LC/MS	No	No	Diabetes marker	25OHD, Anthropometric measures, Cardiovascular marker, Glucose, Insulin, OGTT, HOMA-IR, QUICKI, Si, ISR, BMI, Lipid profiles	Low	Yes	Yes	Yes	Yes	Yes	Yes	50 - 80 nmol/l	24	58.75		21.25
[truncated: 15 more columns]
